# Supplementary material for: Clonal somatic copy number altered driver events inform drug sensitivity in high-grade serous ovarian cancer
Source: PubMed Central journal article supplement (PMC9606297; doi:10.1038/s41467-022-33870-0), 2022-10-26
Supplement: 41467_2022_33870_MOESM1_ESM.pdf [file 41467_2022_33870_MOESM1_ESM.pdf]

### Supplementary Figure S1

**a**

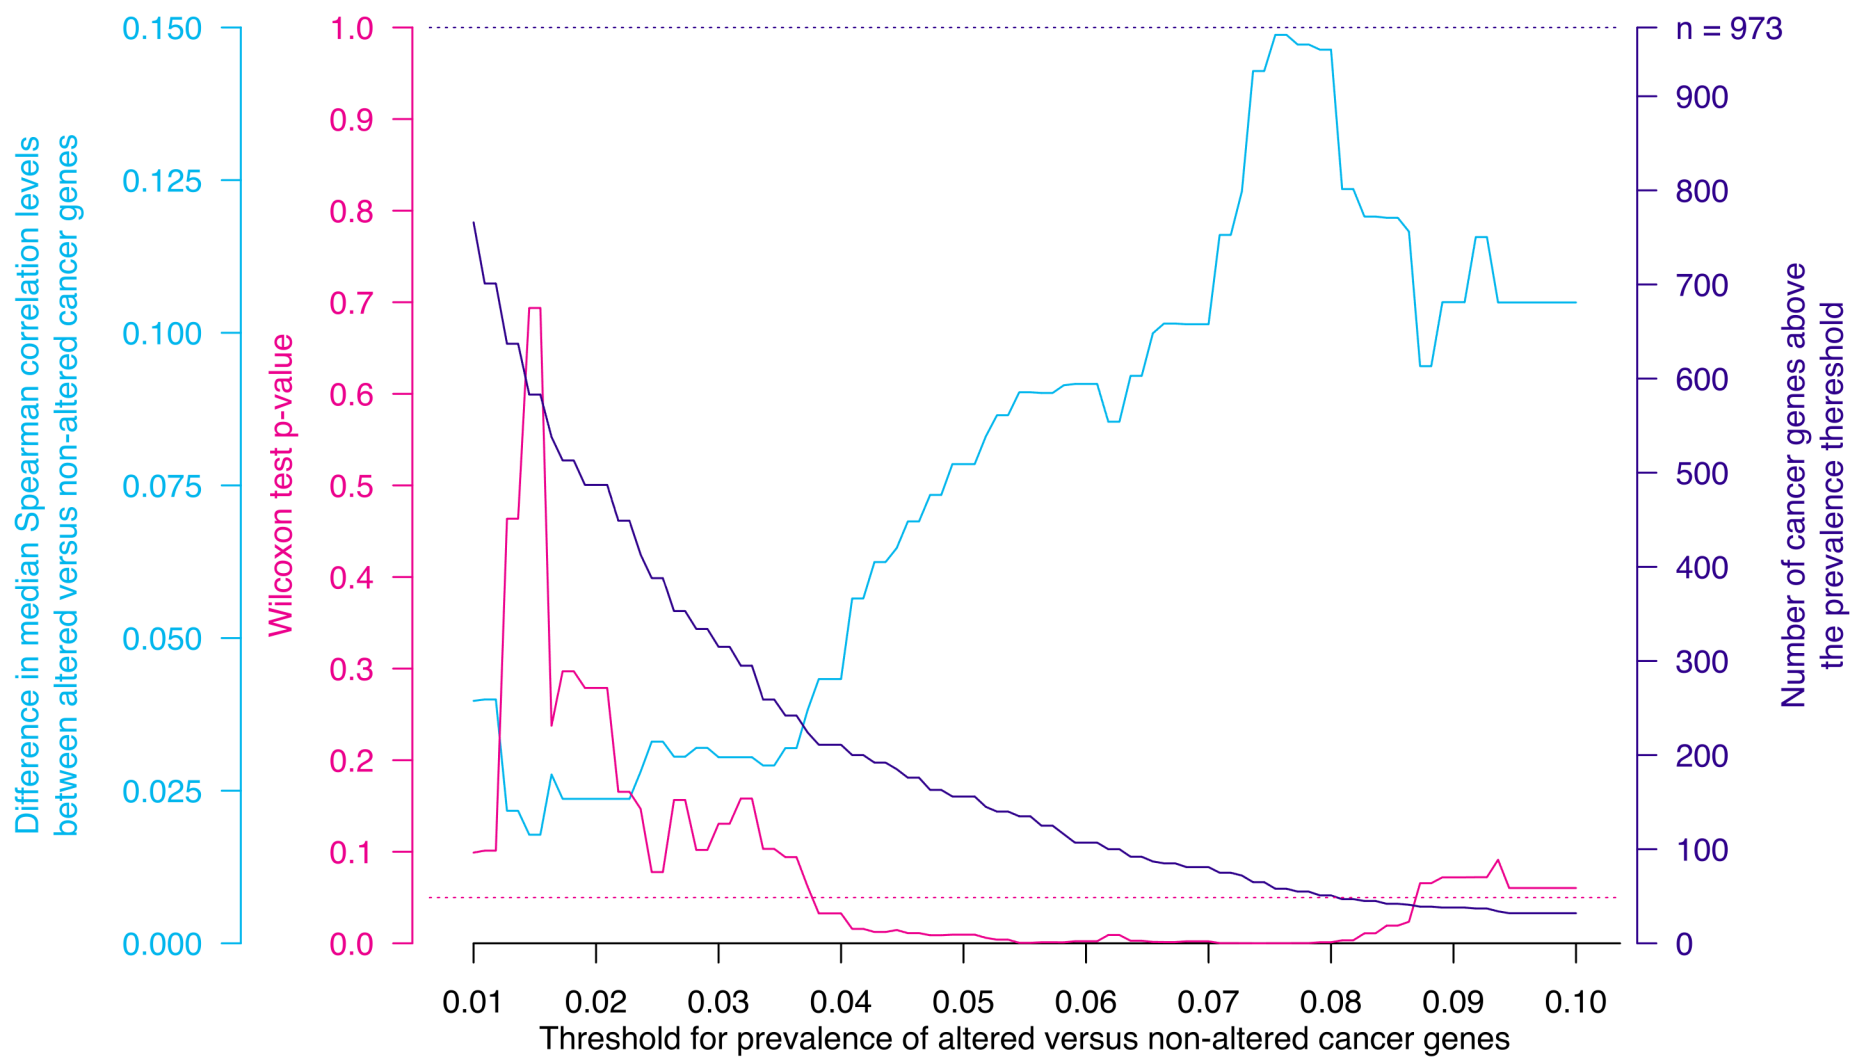

**b**

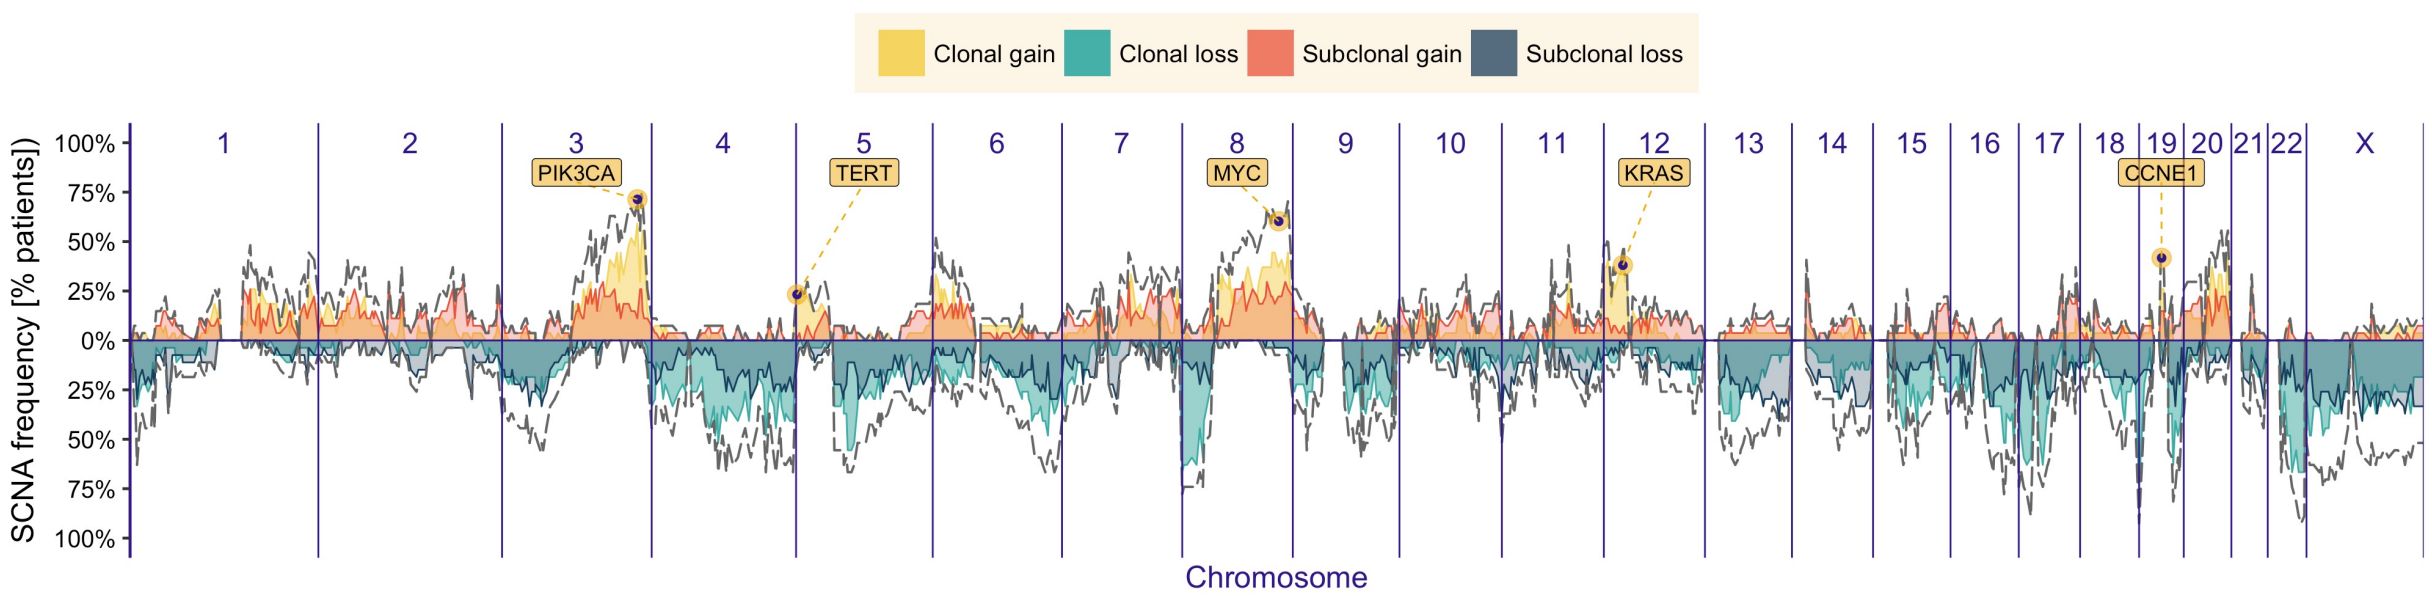

**a.** Plot showing, for different threshold values defining altered versus non-altered genes (x-axis), the number of cancer genes above the threshold (purple line), the difference of median of Spearman's correlation scores between gene expression and respective chromosomal copy number for each gene (light blue line) and the p-values of the two-sided Spearman's test of association between paired samples when comparing altered cancer genes with remaining cancer genes (pink line) **b.** Genomic distribution of the frequency of clonal and subclonal somatic copy number alterations across 127 regions of both primary tumours and metastases from 30 HGSOc patients.

## Supplementary Figure S2

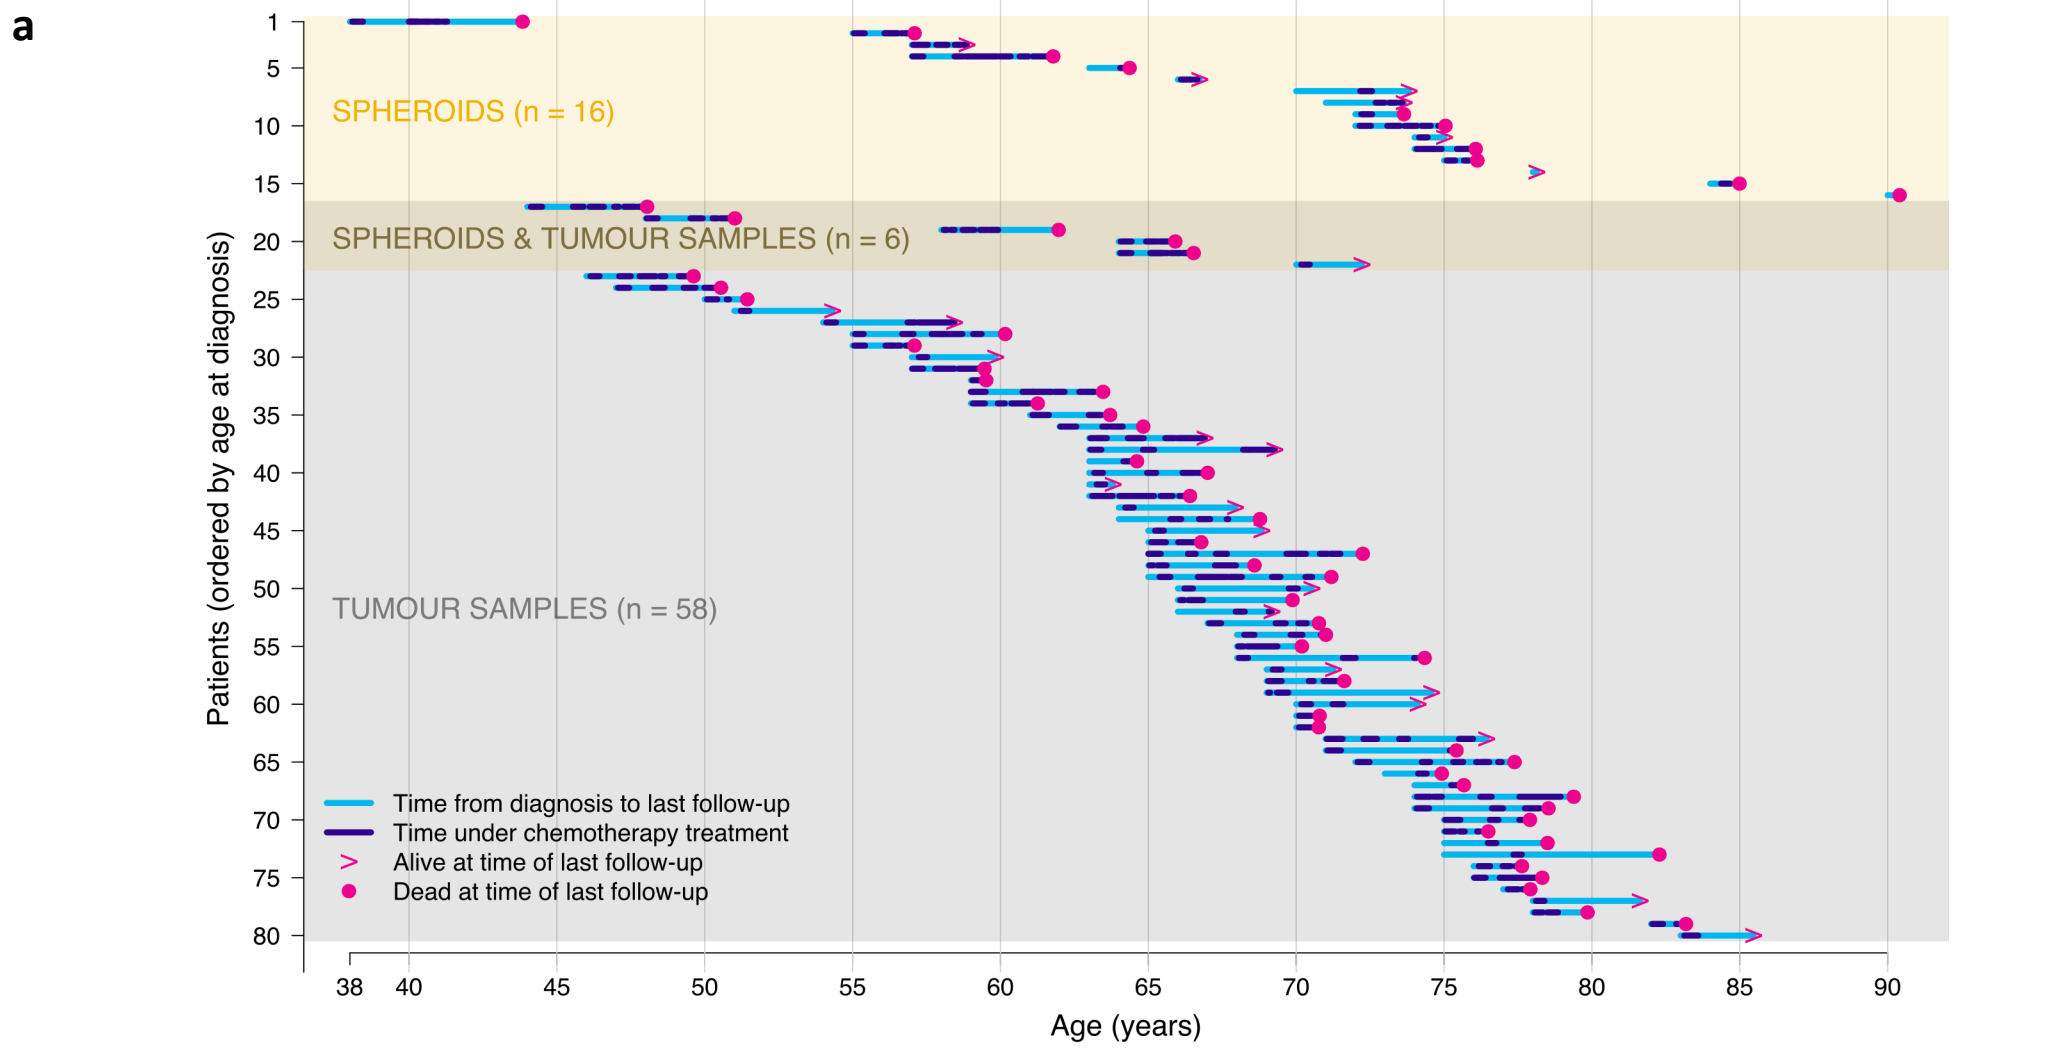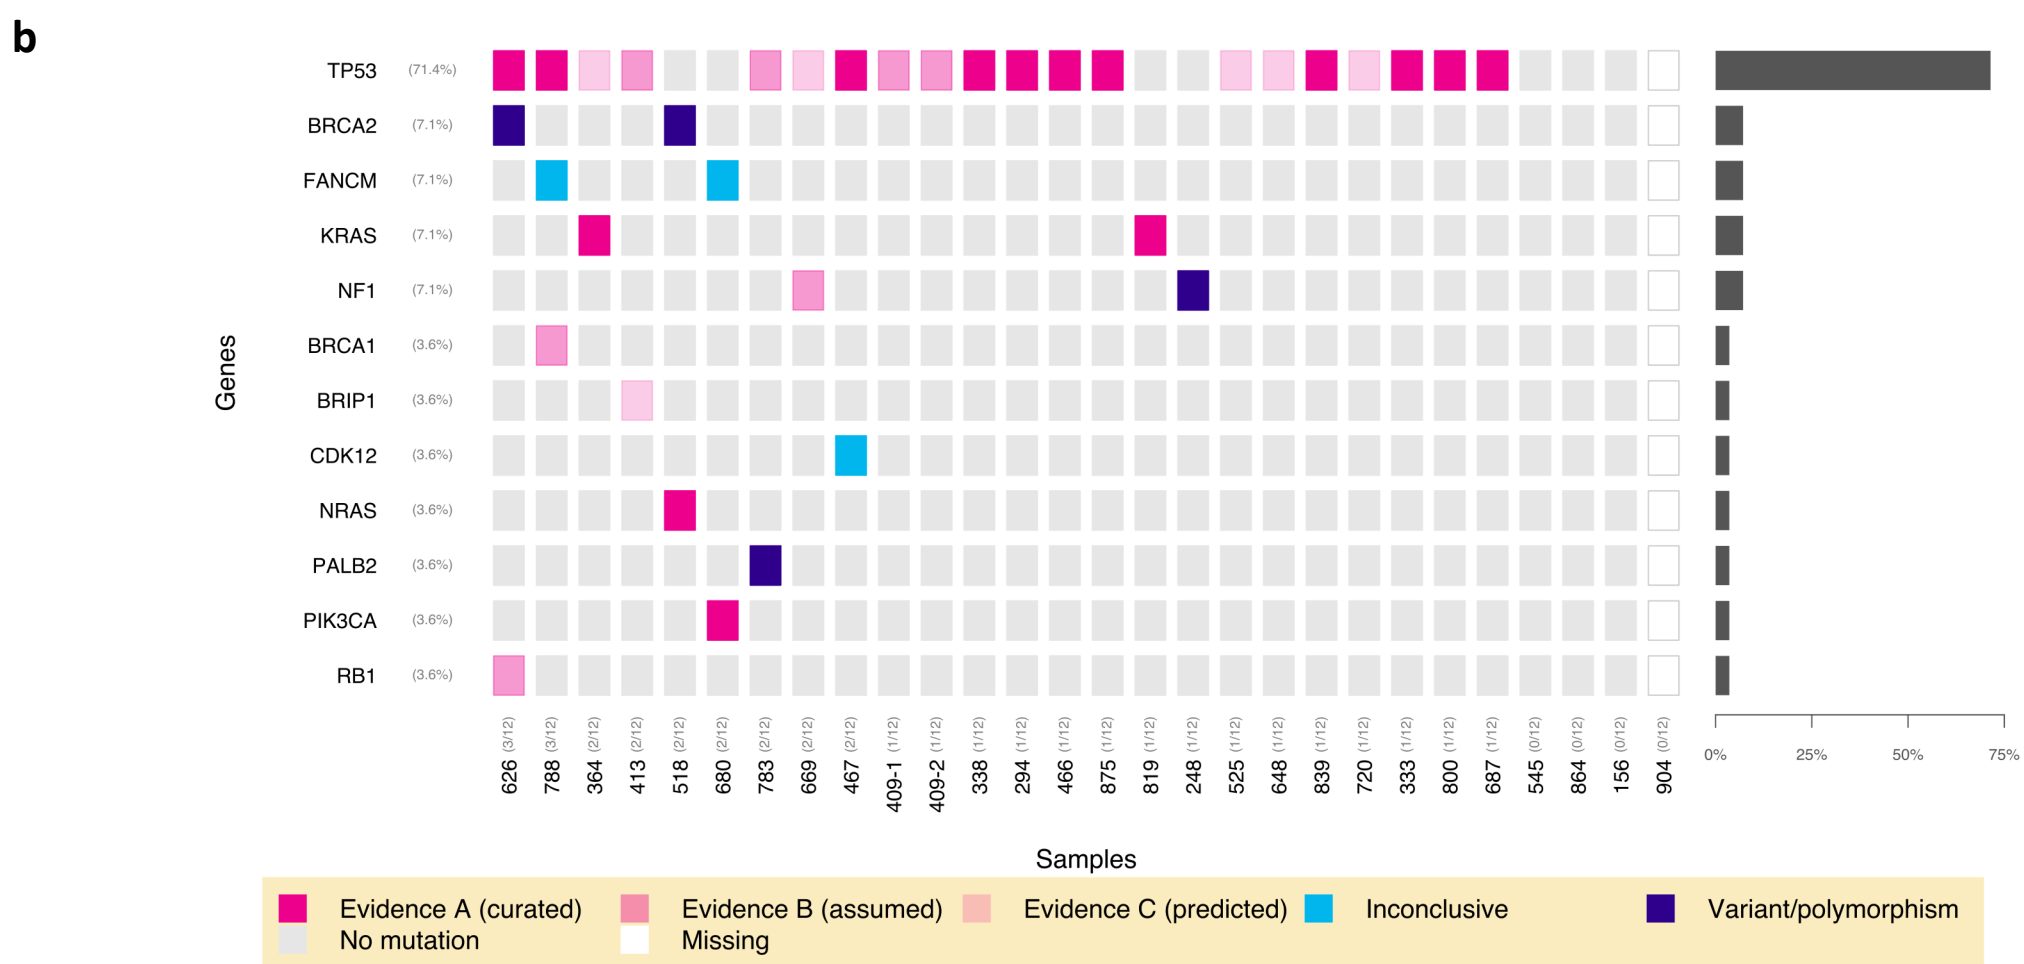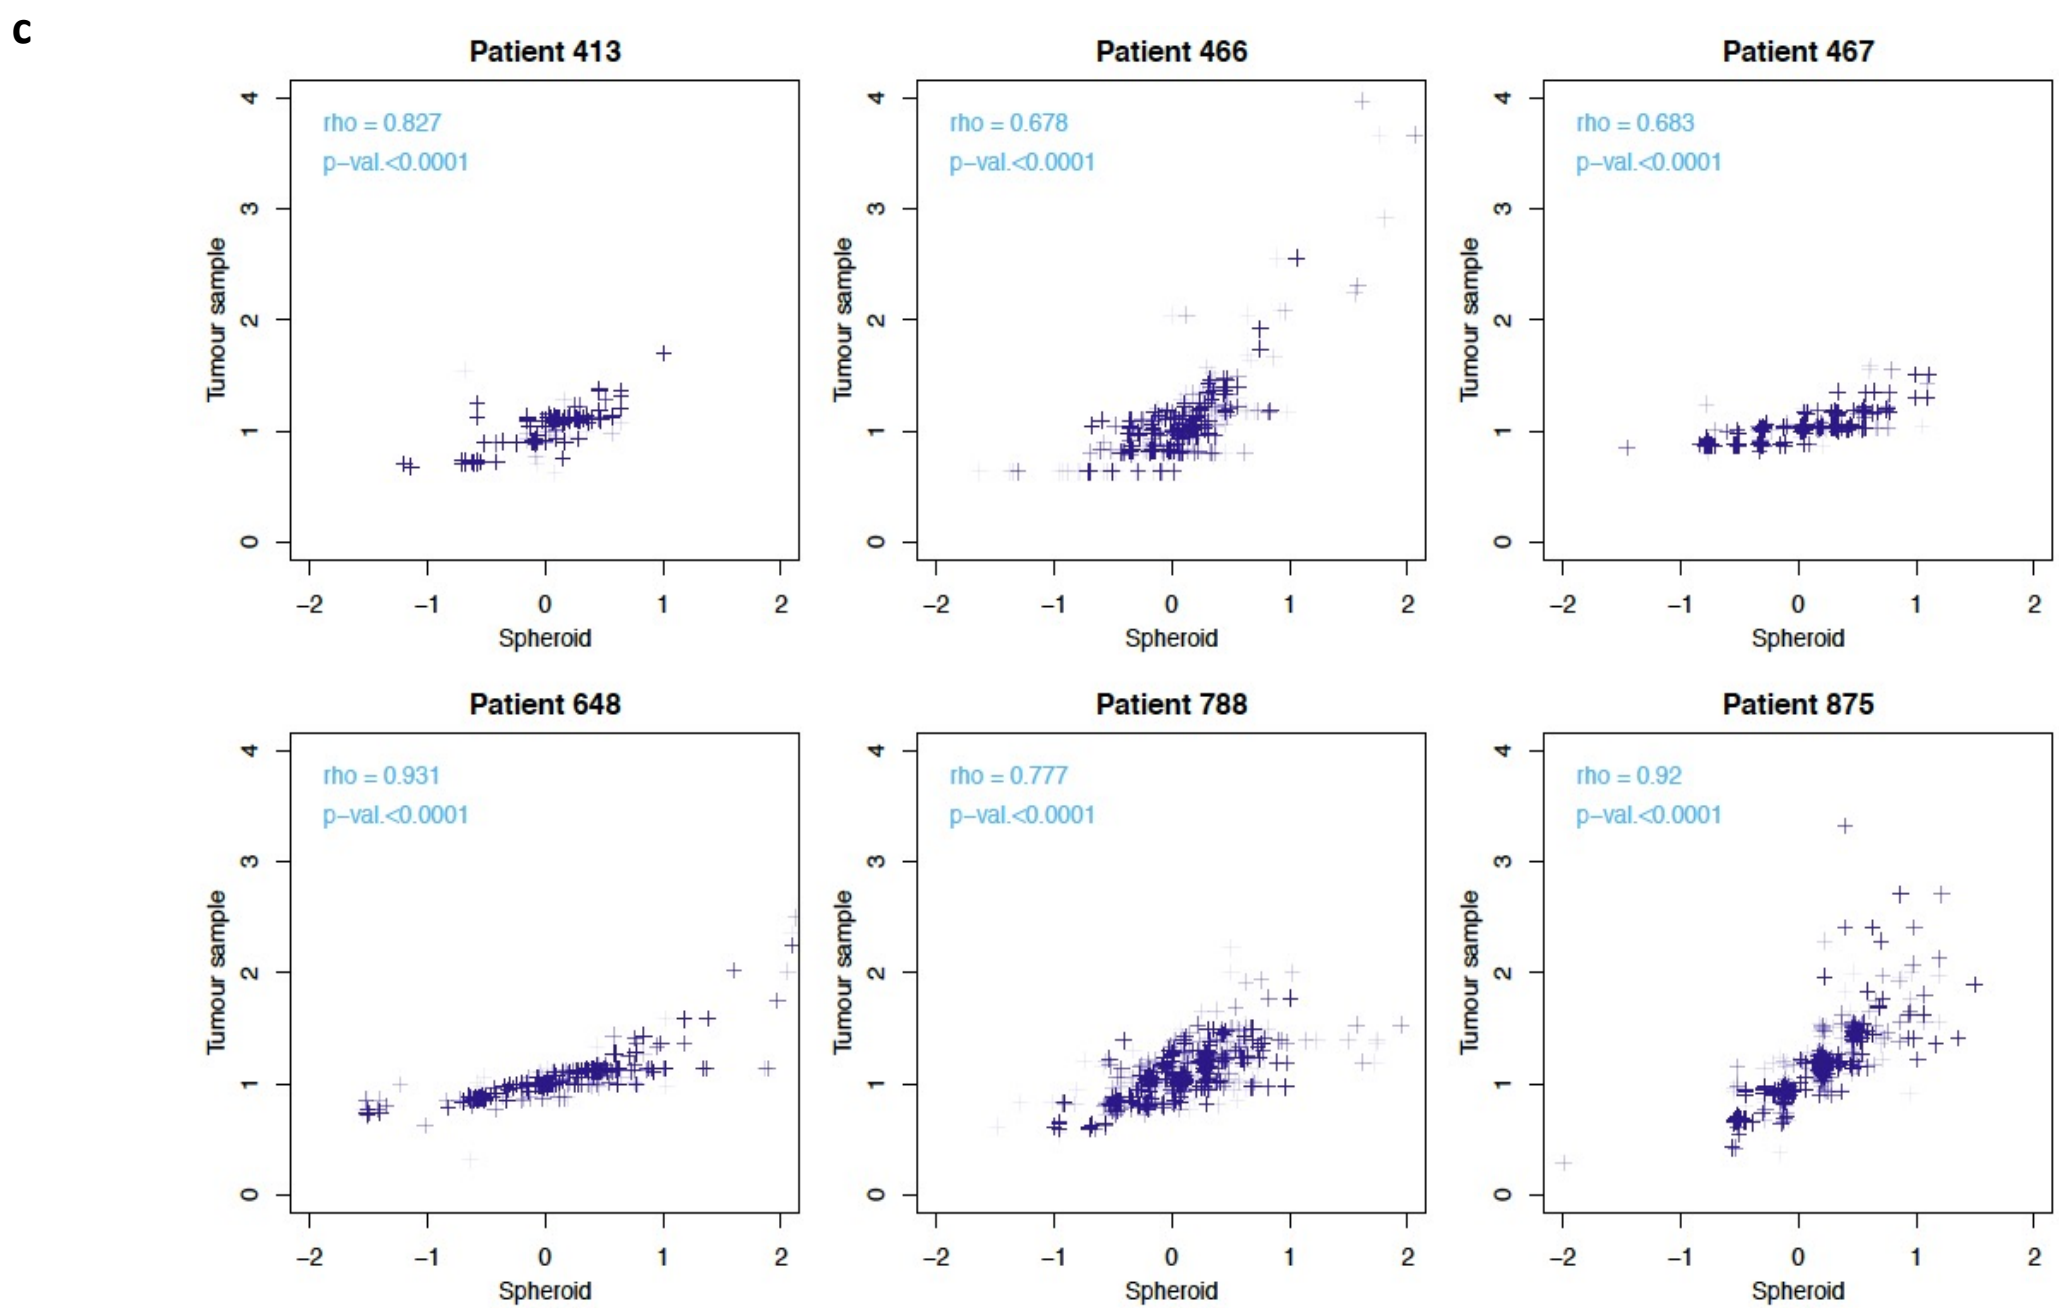

**a.** Timeline with characterisation of the OVO4 clinical cohort used in this study and time of follow-up for each patient with information related to patient status at last follow-up, chemotherapy treatment period(s) and cancer type. Please see Supplementary Figures S3a-u for more clinical details on the cohort of spheroid samples. **b.** Matrix showing the gene variants (mutations and polymorphisms) identified in our cohort, distributed by functionality and level of evidence (after curation using the MTBP clinical decision support system). **c.** Spearman's correlation coefficient and two-sided test p-value (inference without multiplicity correction) between relative copy number for each individual genomic segment in matched spheroid and tumour samples.

### Supplementary Figure S3

*Supplementary Figures S3a-u (figures in the following pages)*

Summary of clinical details, genomic profiles and *in vitro* response to several targeted drugs for each individual HGSOc spheroid sample. In the timelines on the top left quadrant, we have marked relevant time points, including S: day of surgery, C: date for sample collection, D: death; CT is represented as blue (complete response), green (partial response), yellow (stable disease) and red (progressive disease). Chemotherapy treatment periods and drug combinations are available in the lower part of the plot. In the top right quadrant, we present the genomic profiles for each spheroid sample. In the x-axis, the genomic segments from each chromosome are in order and, in the y-axis, the relative copy number is presented in log<sub>2</sub> scale. Plots showing individual drug response in spheroids are presented in the bottom half of each figure, with drug response (standardised to the median of the control group) on the y-axis and drug concentration on the x-axis. Each dot corresponds to a replicate (typically 3 per dose).

# Supplementary Figure S3a -- Patient 294 -- HGSOC -- Stage III

## Timeline

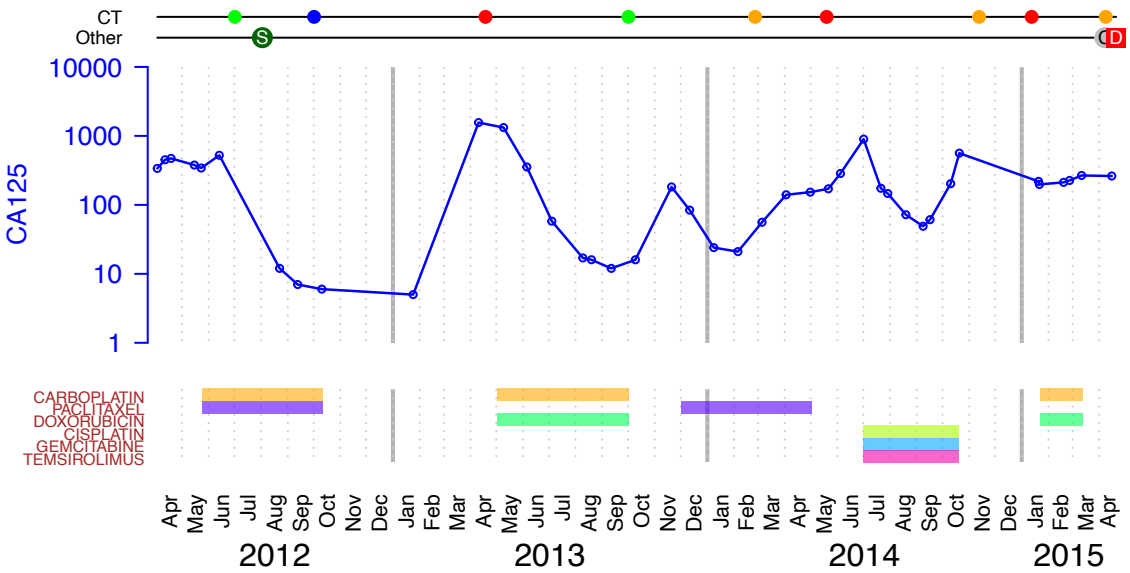

## Tumour Relative Copy Number Profile

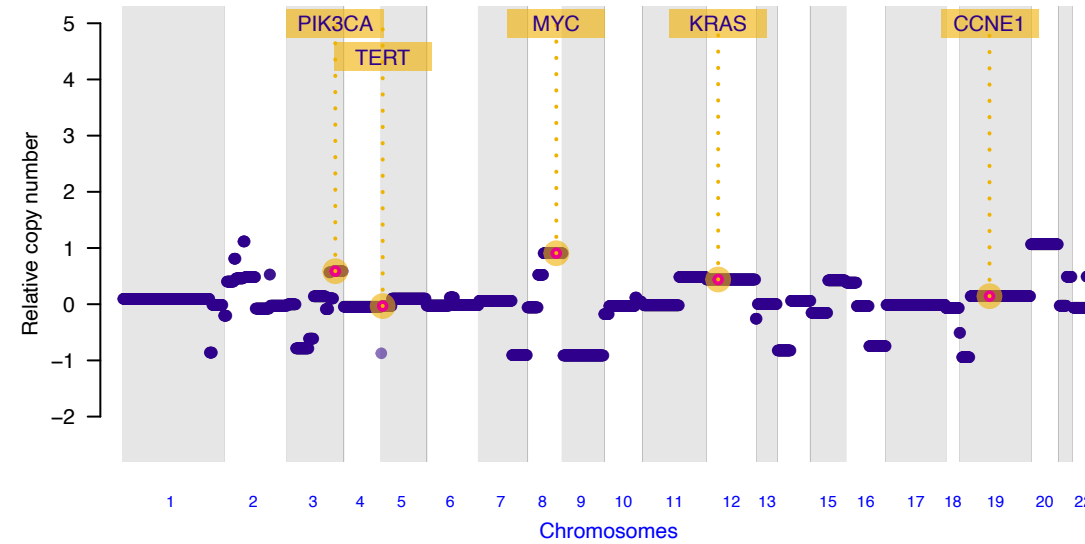

## Spheroids drug response

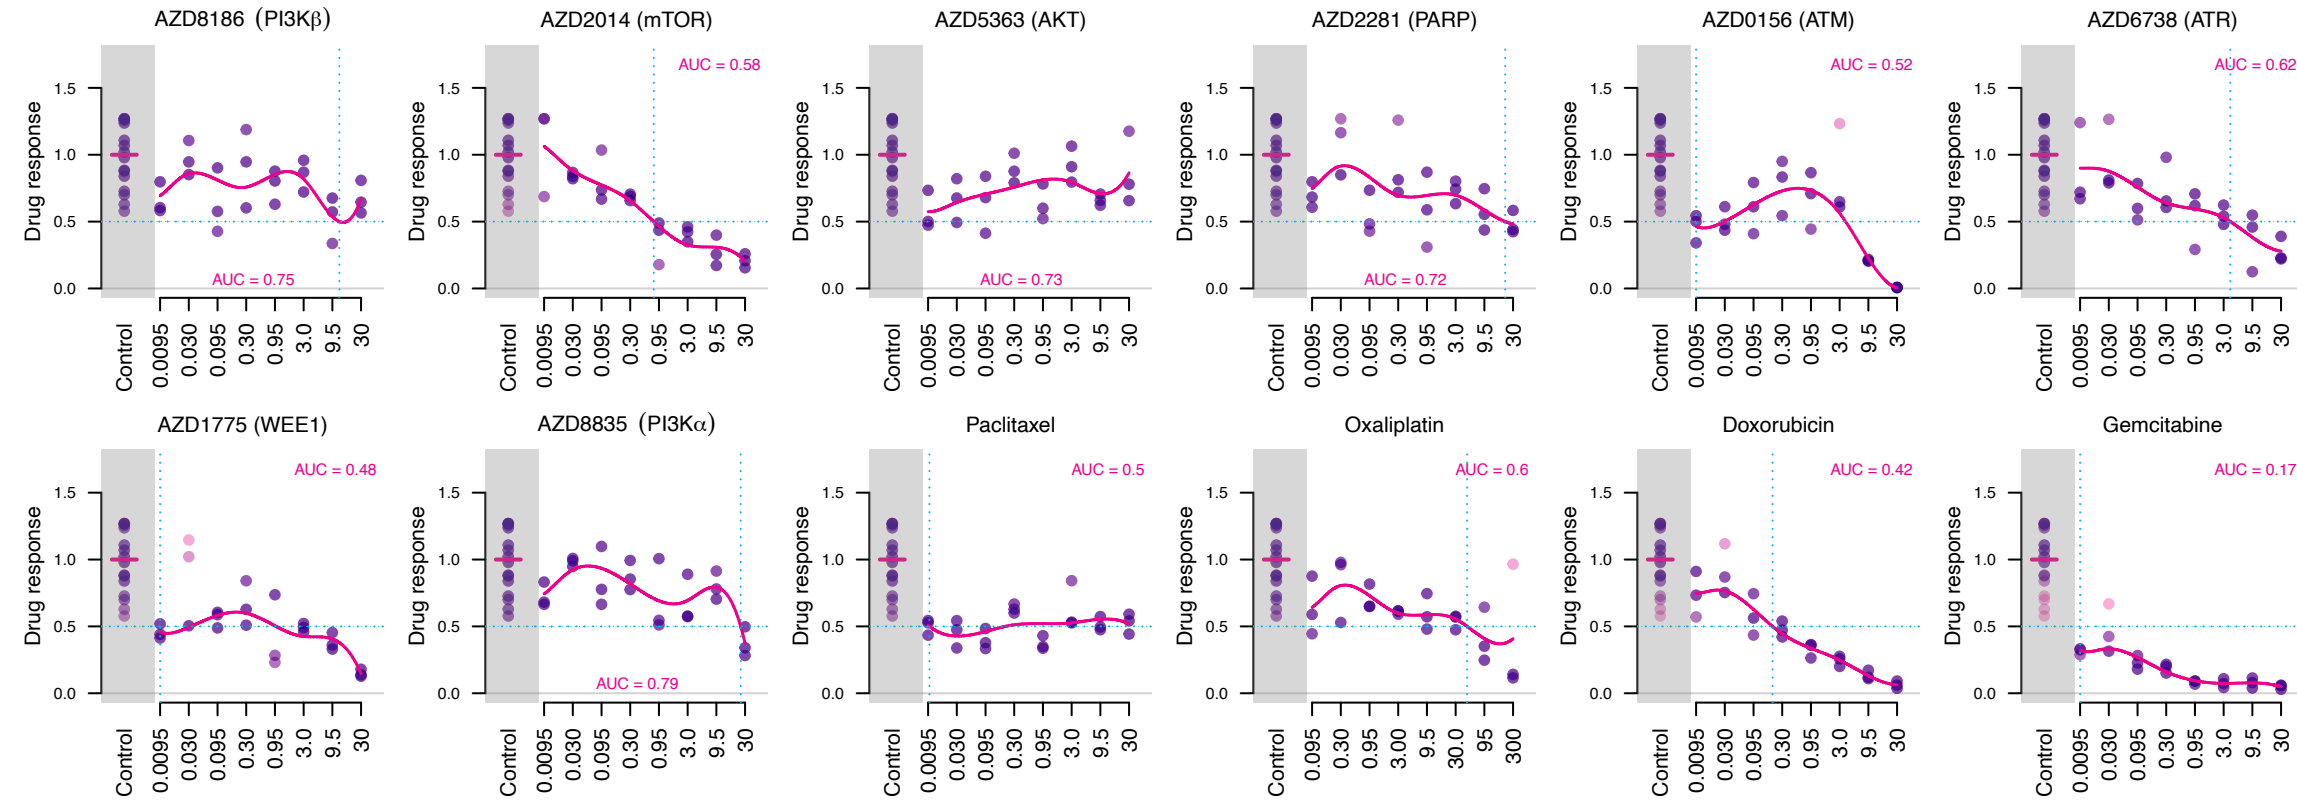

# Supplementary Figure S3b -- Patient 333 -- HGSOC -- Stage IV

## Timeline

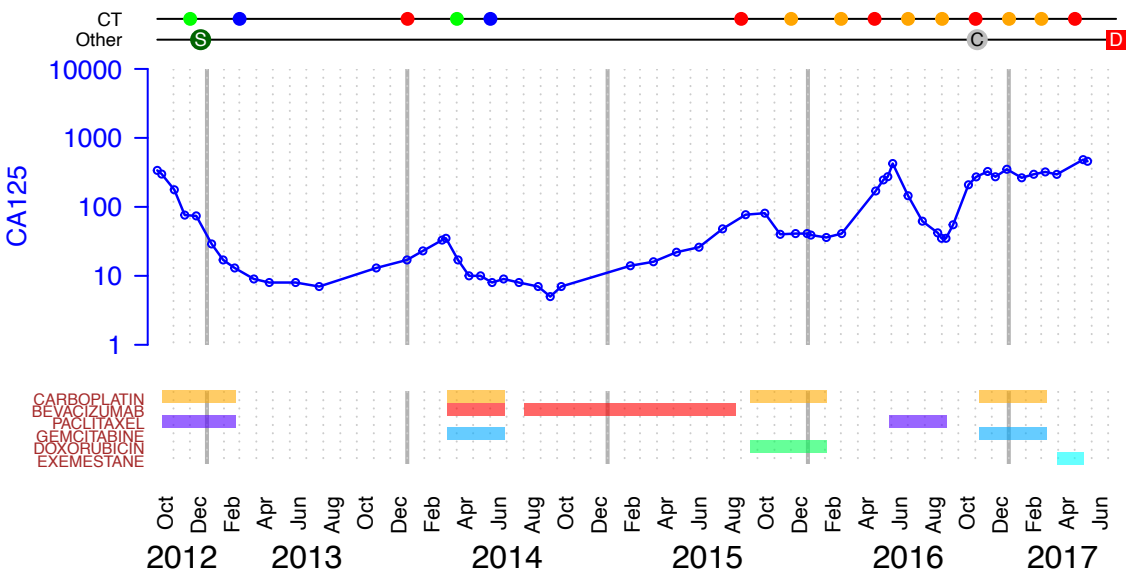

## Tumour Relative Copy Number Profile

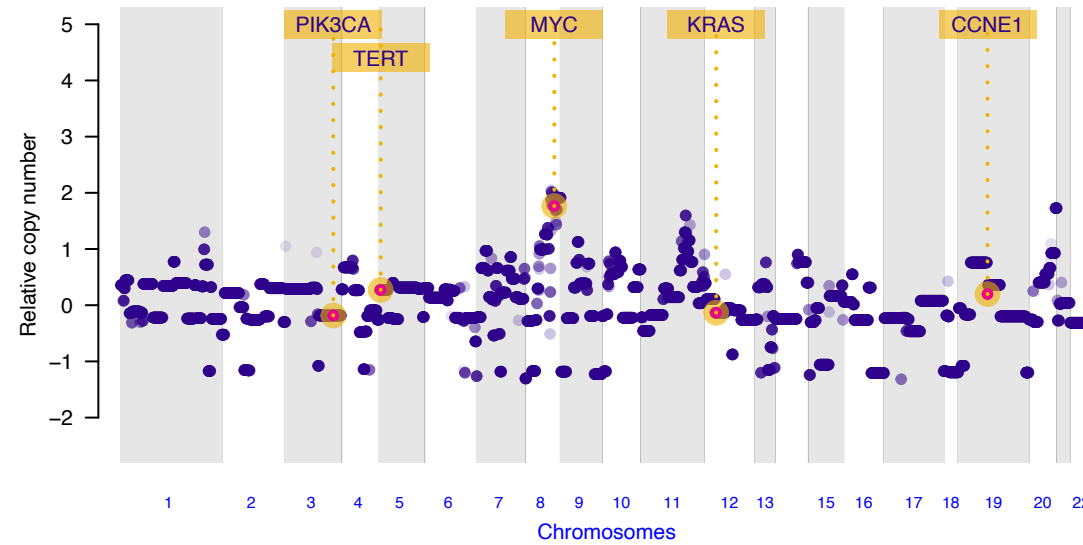

## Spheroids drug response

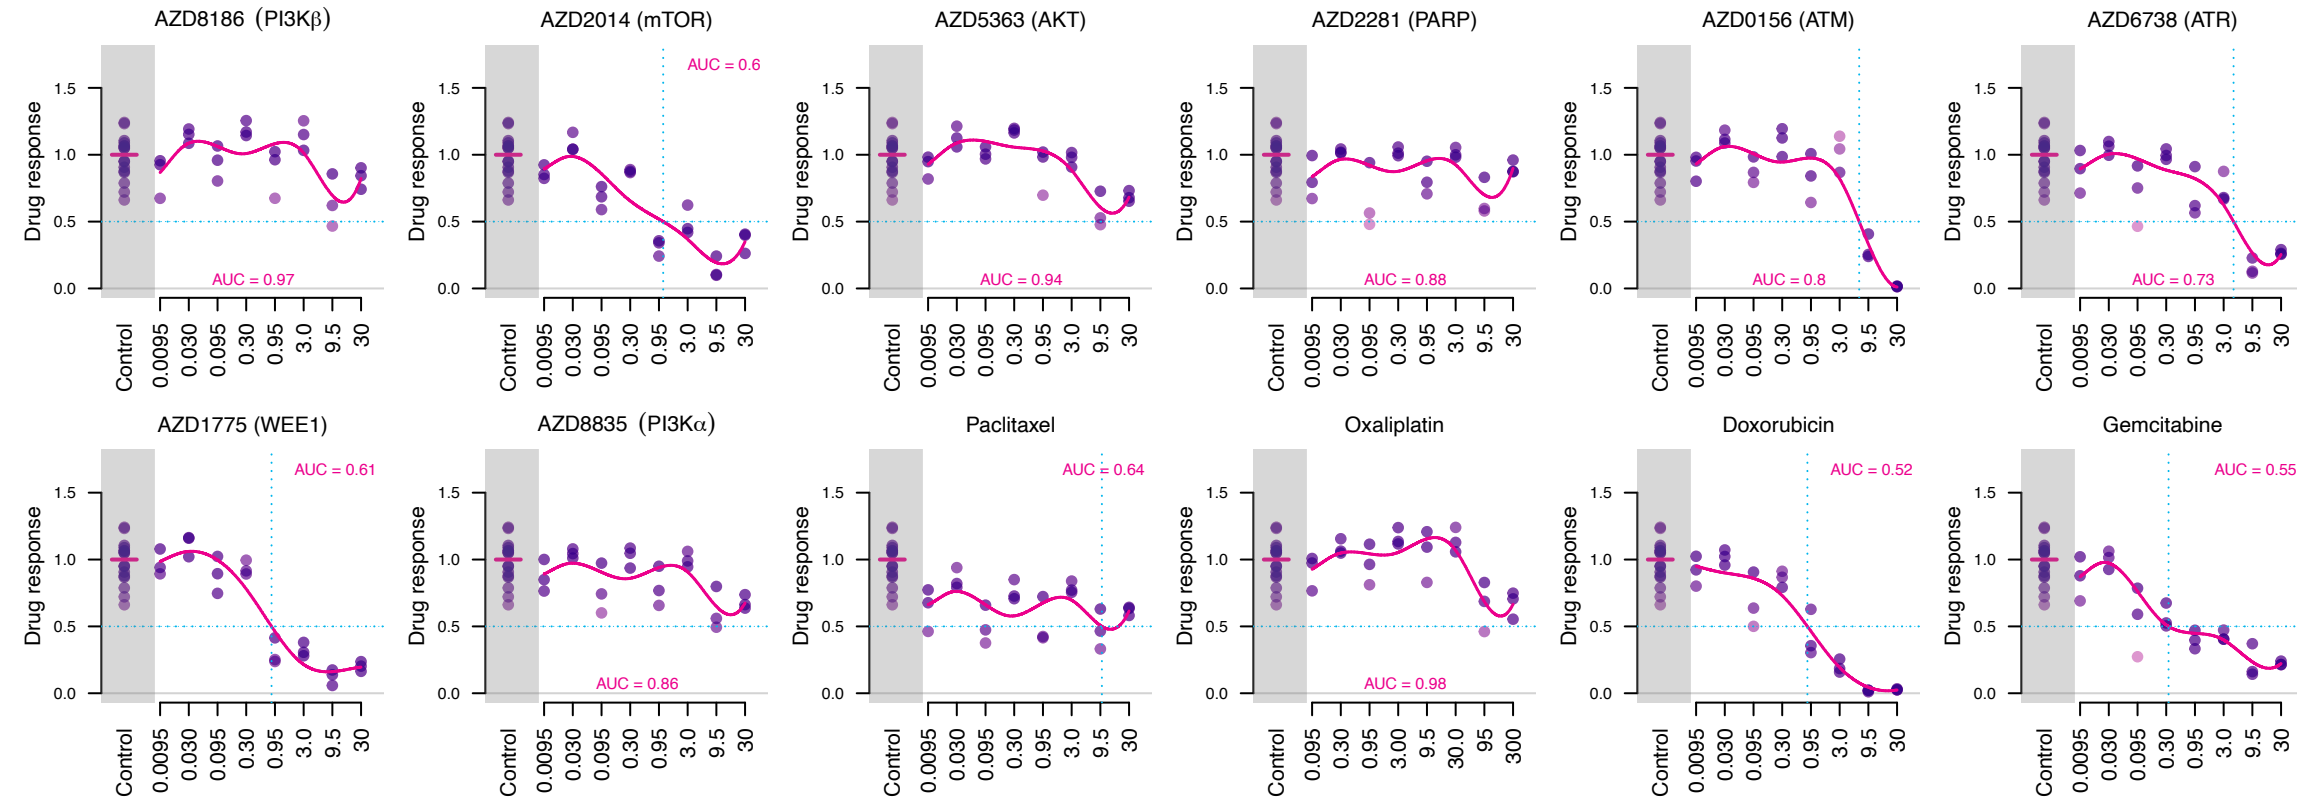

# Supplementary Figure S3c -- Patient 364 -- HGSOC -- Stage IV

## Timeline

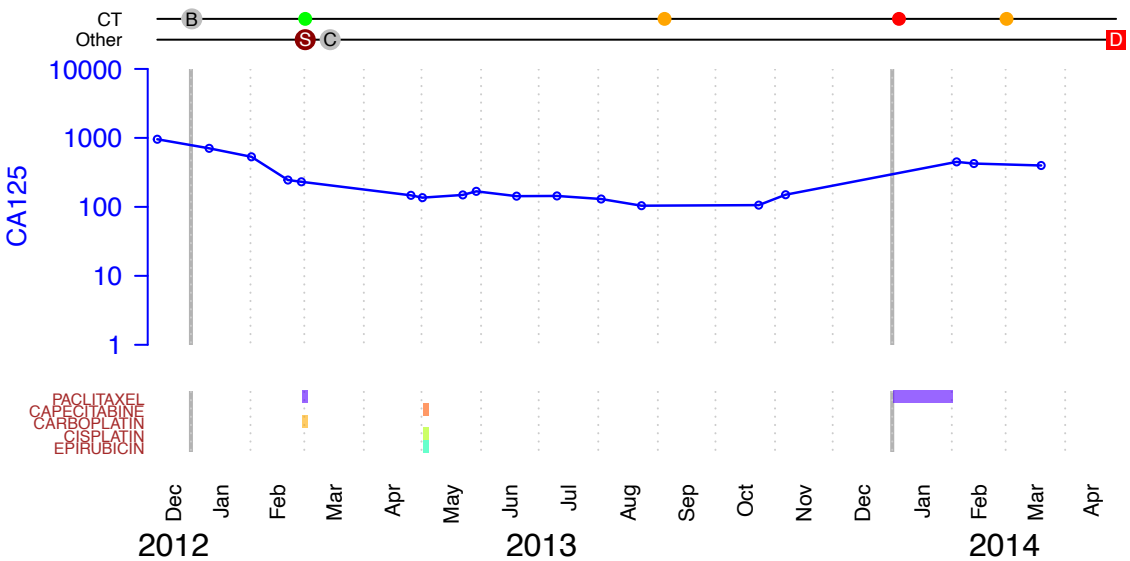

## Tumour Relative Copy Number Profile

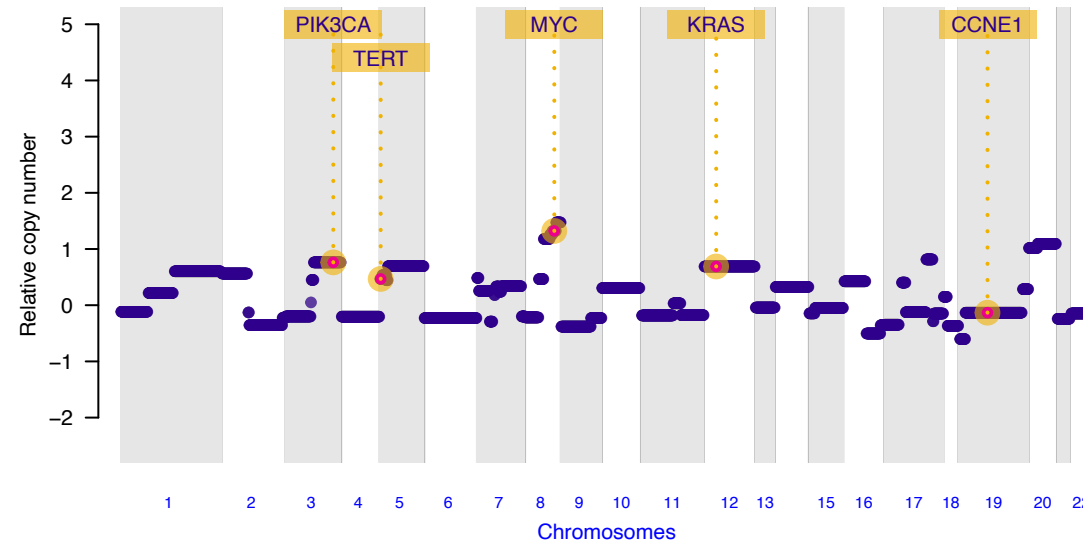

## Spheroids drug response

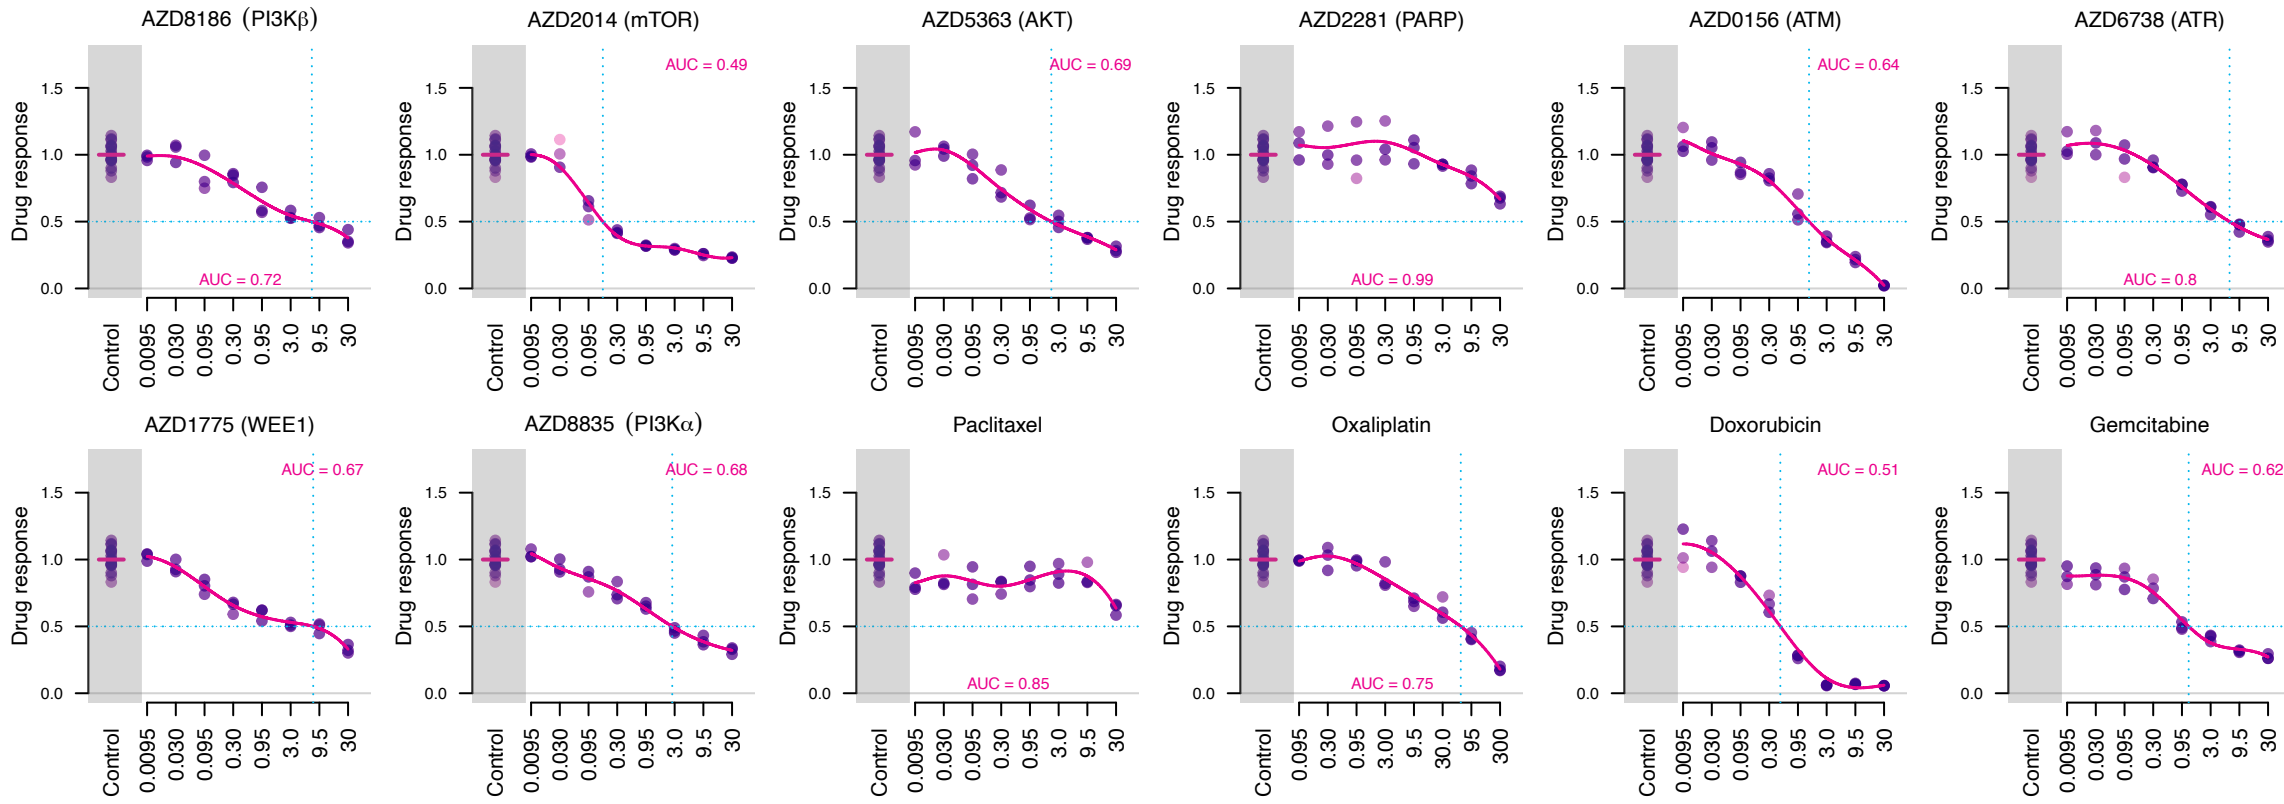

# Supplementary Figure S3d -- Patient 409 (First sample) -- HGSOEC -- Stage IV

## Timeline

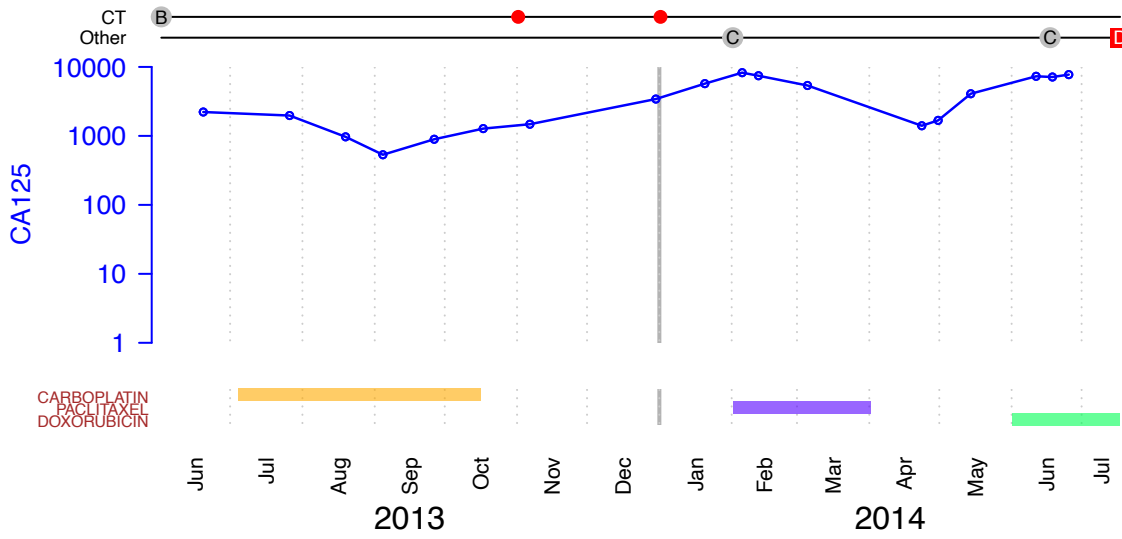

## Tumour Relative Copy Number Profile

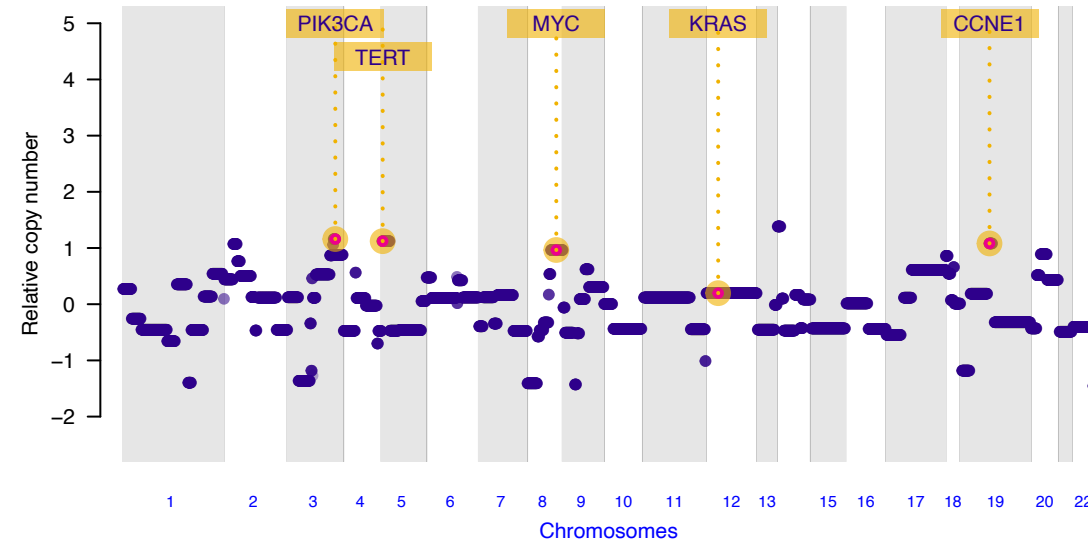

## Spheroids drug response

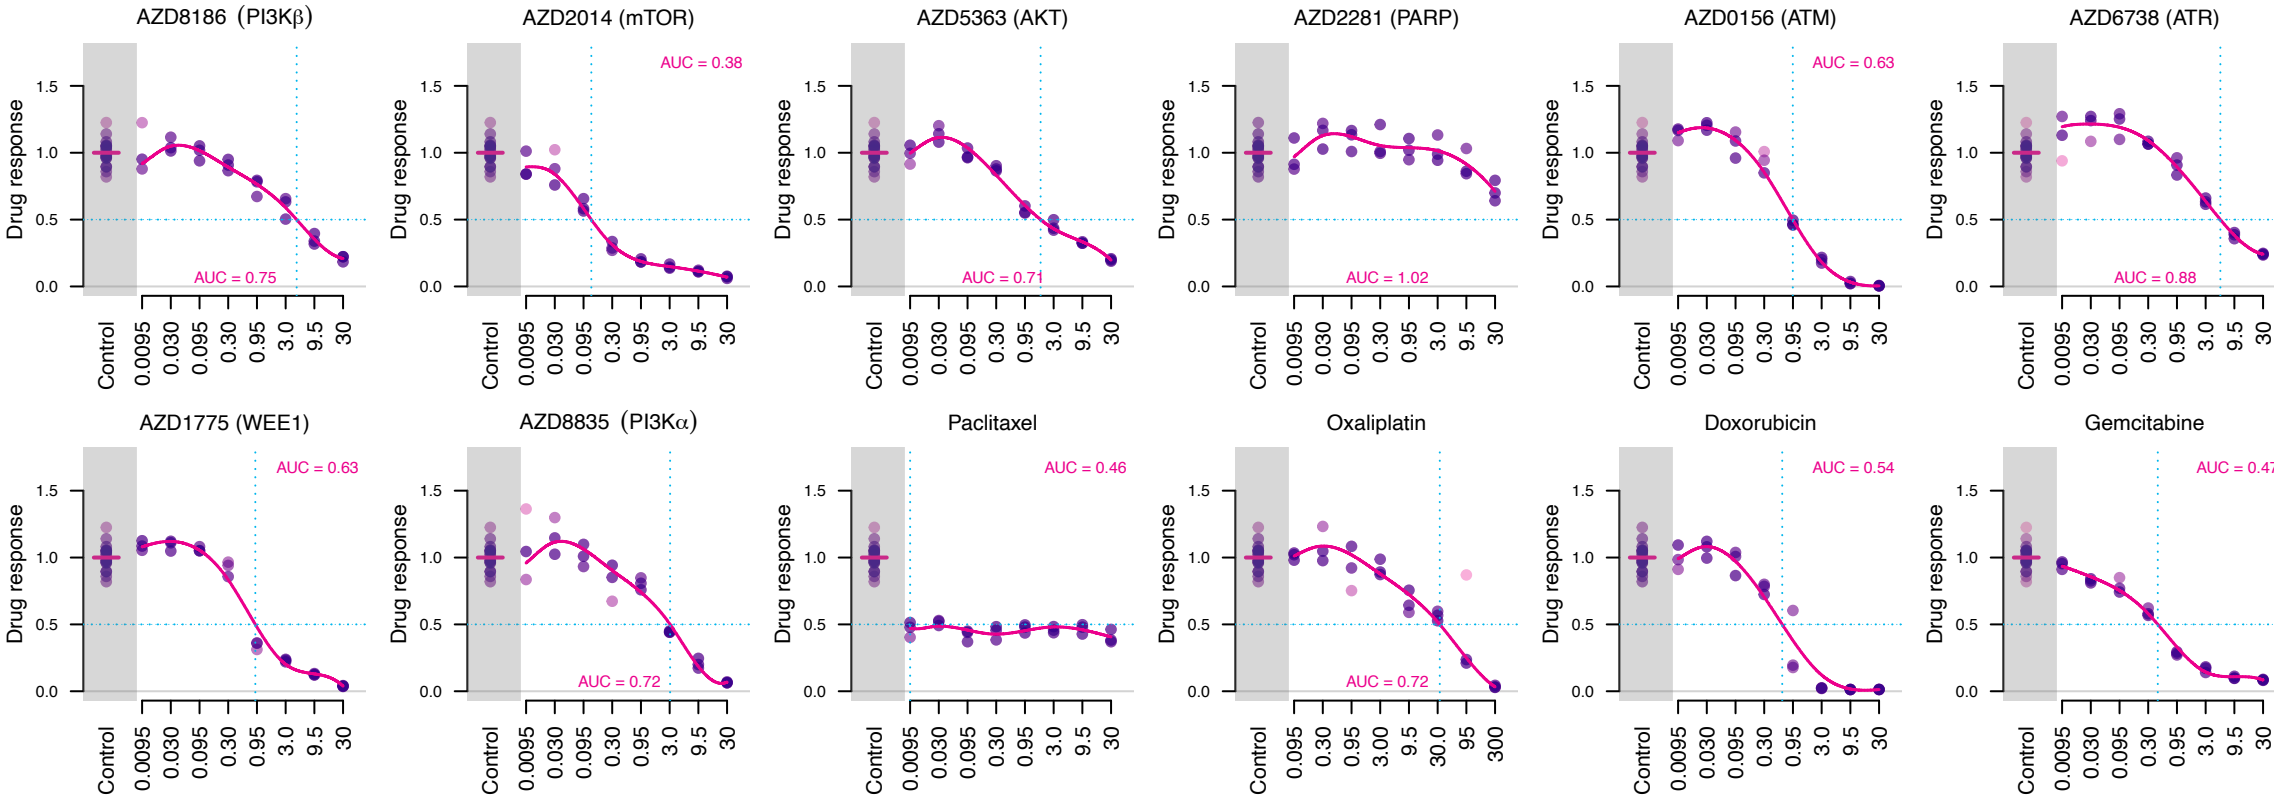

# Supplementary Figure S3e -- Patient 409 (Second sample) -- HGSOC -- Stage IV

## Timeline

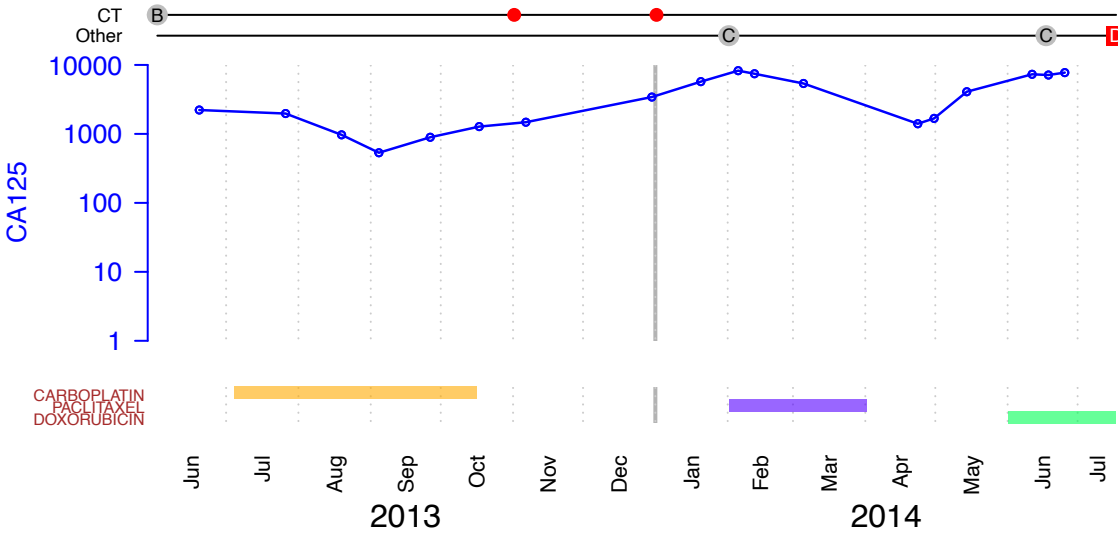

## Tumour Relative Copy Number Profile

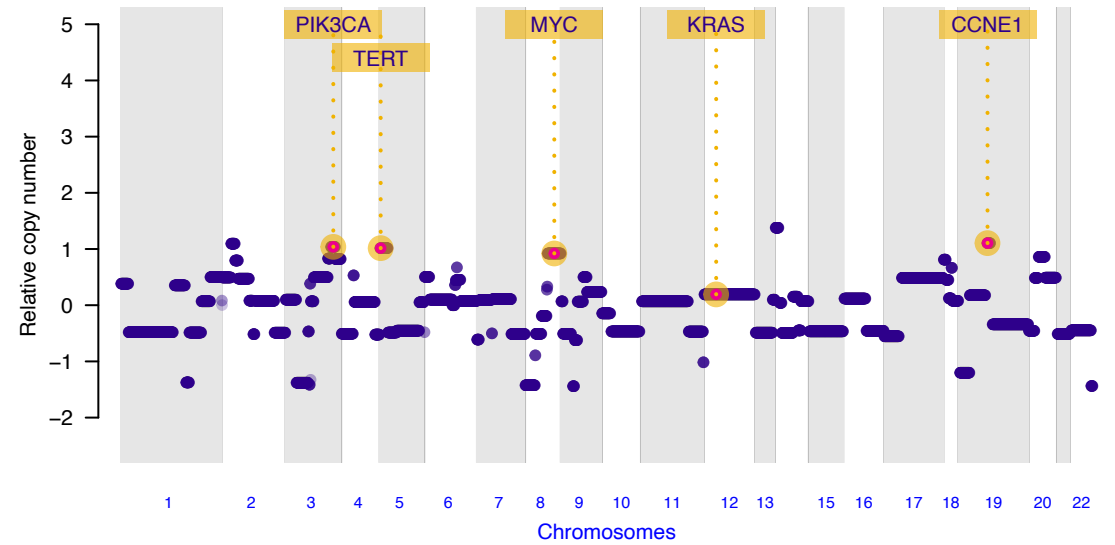

## Spheroids drug response

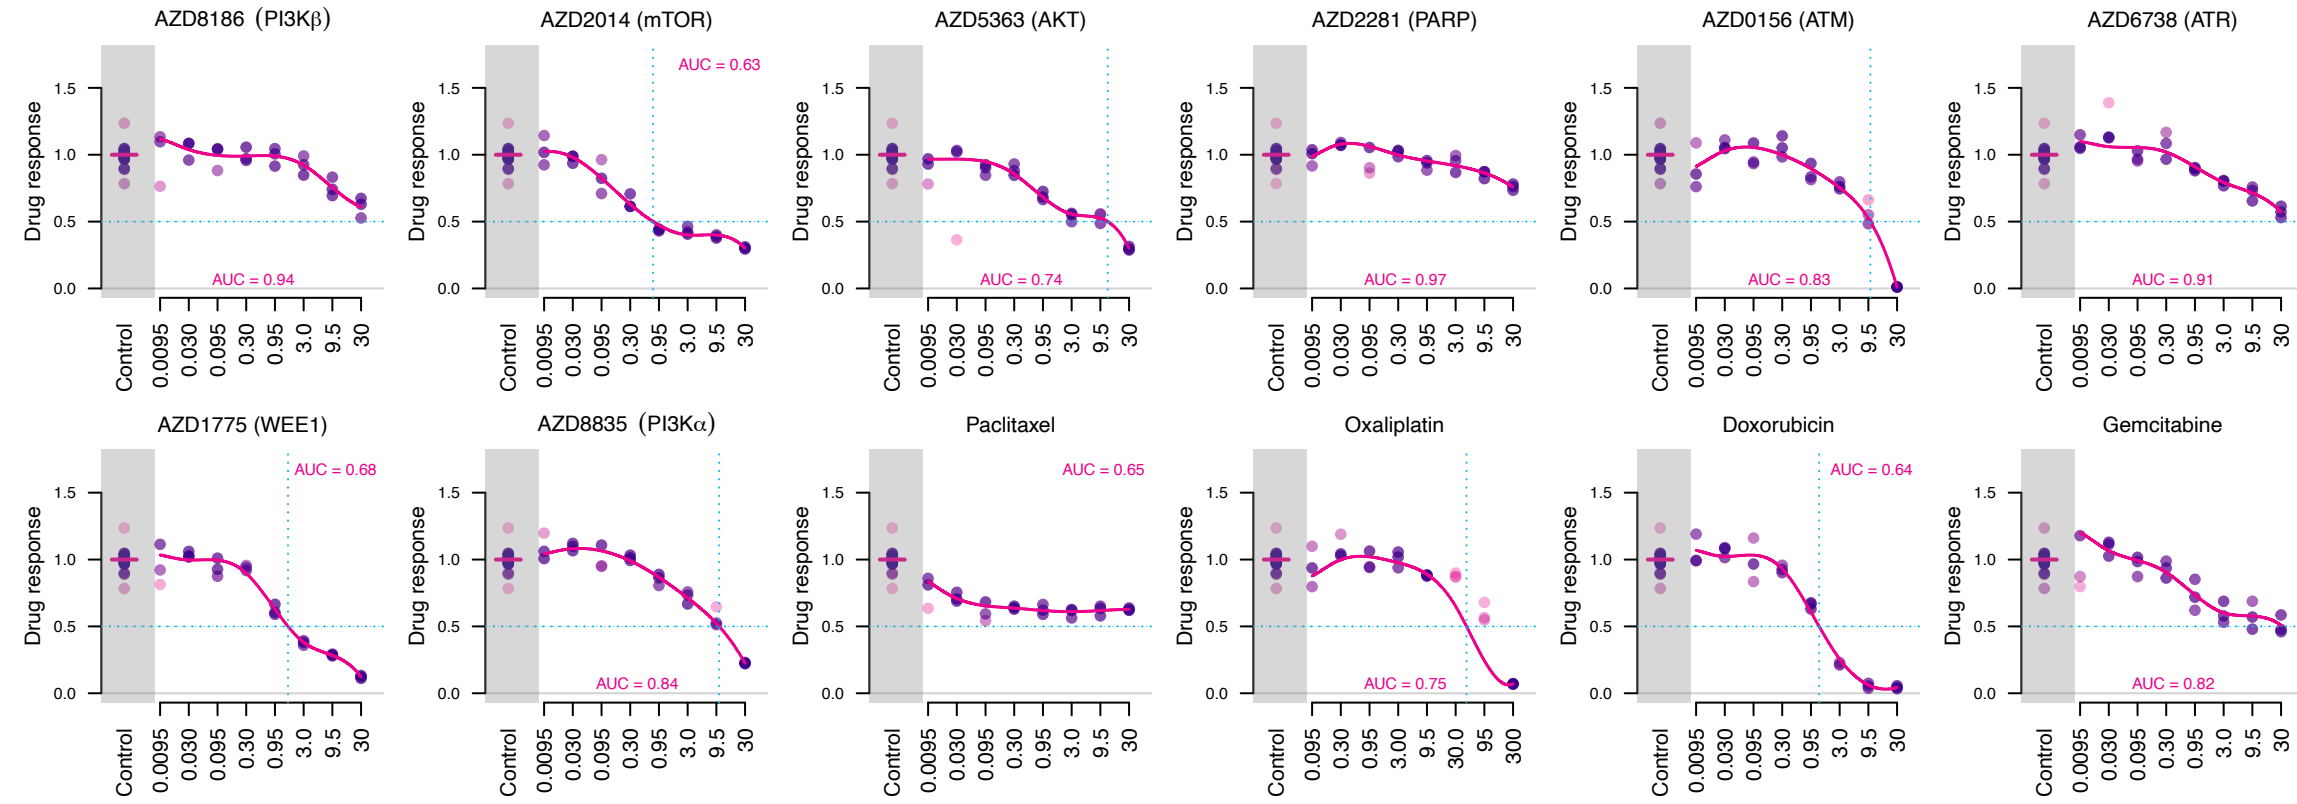



# Supplementary Figure S3f -- Patient 413 -- HGSOC -- Stage III

## Timeline

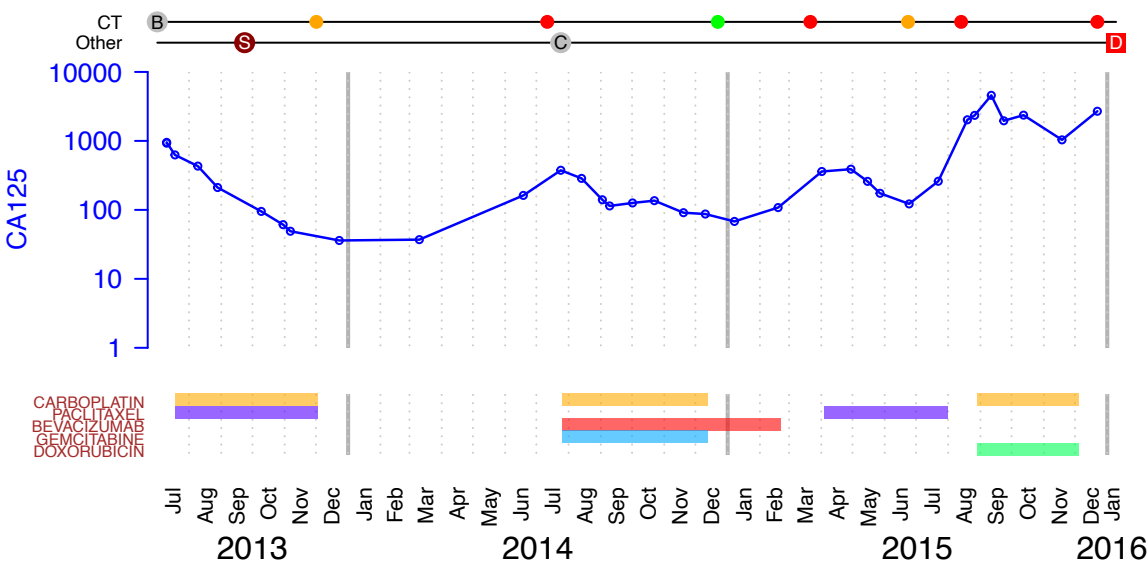

## Tumour Relative Copy Number Profile

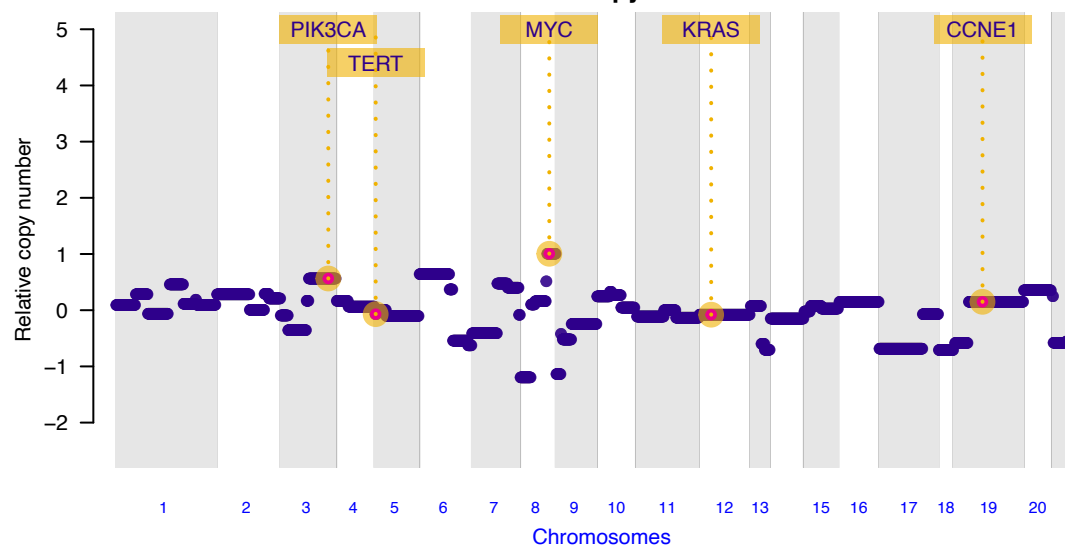

## Spheroids drug response

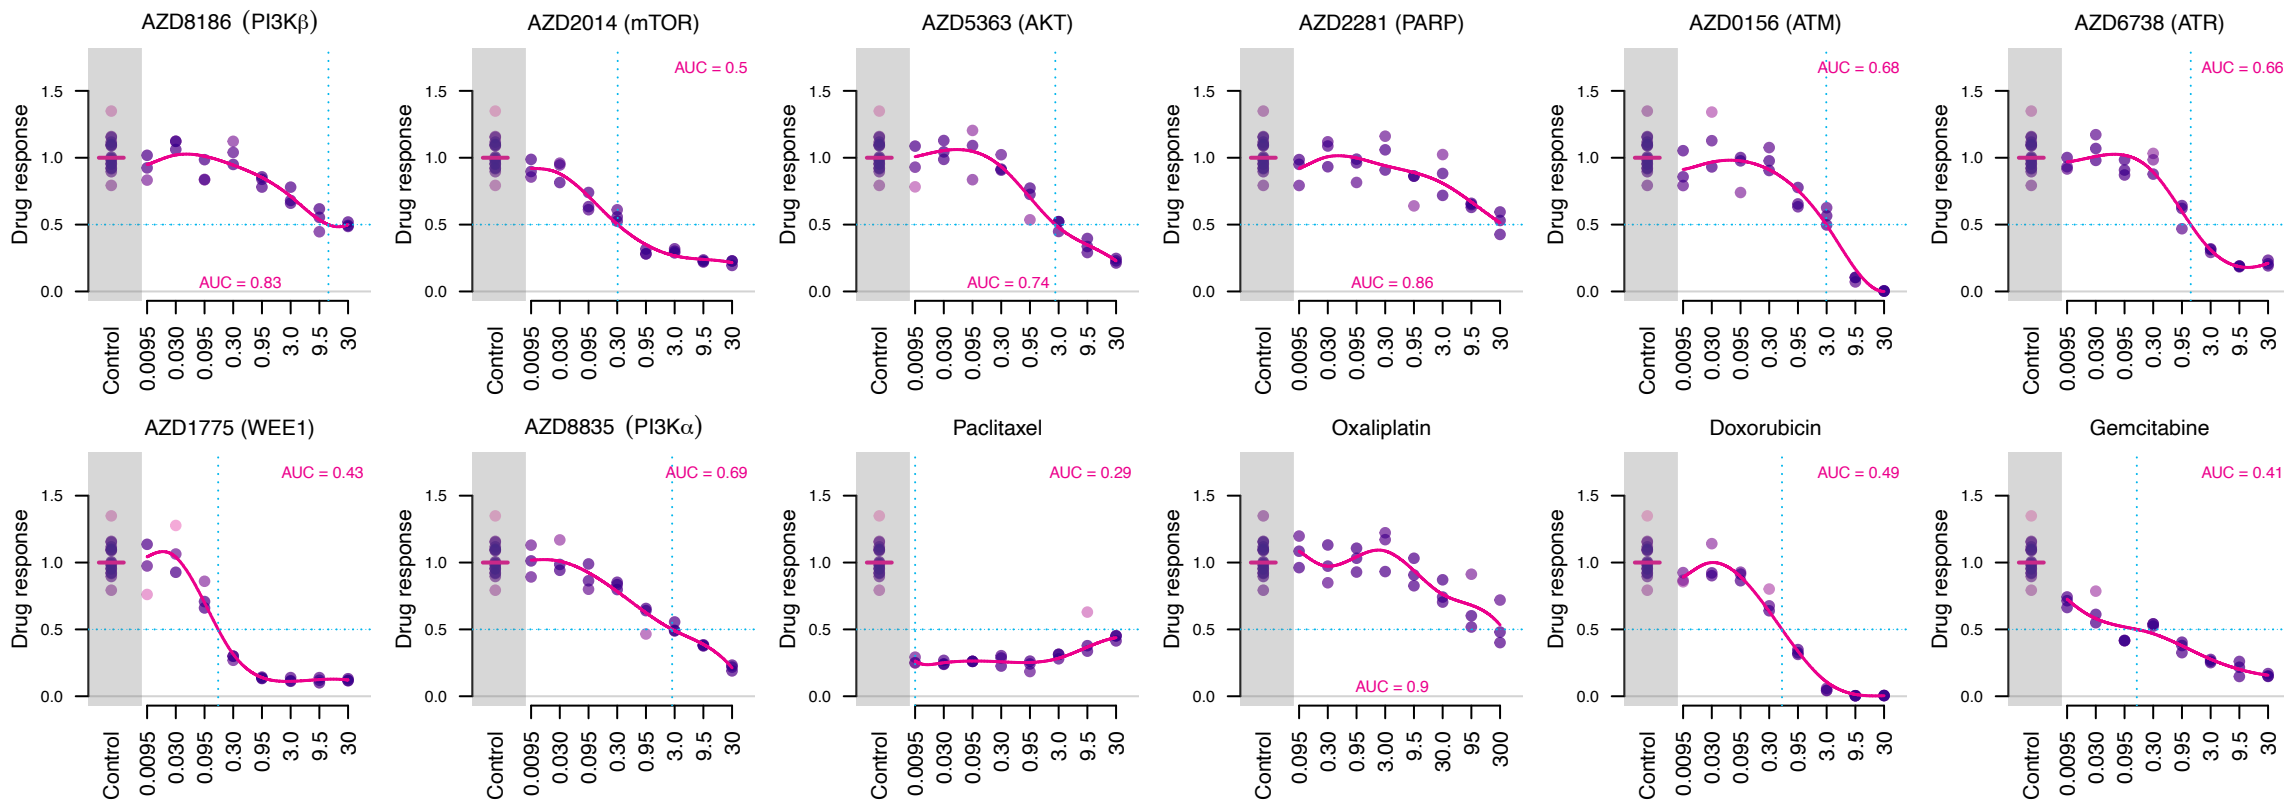

# Supplementary Figure S3g -- Patient 466 -- HGSOc -- Stage III

## Timeline

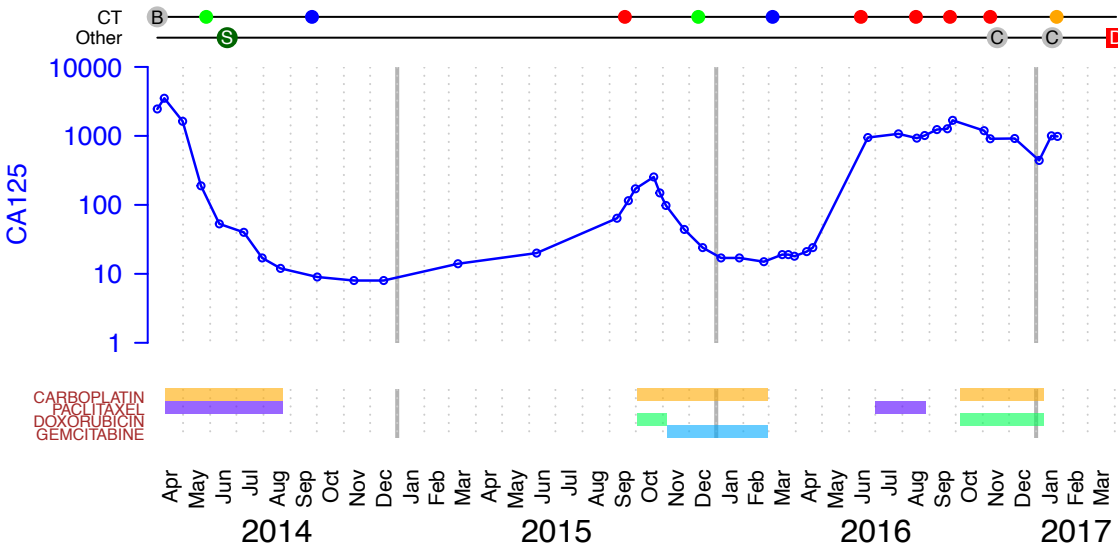

## Tumour Relative Copy Number Profile

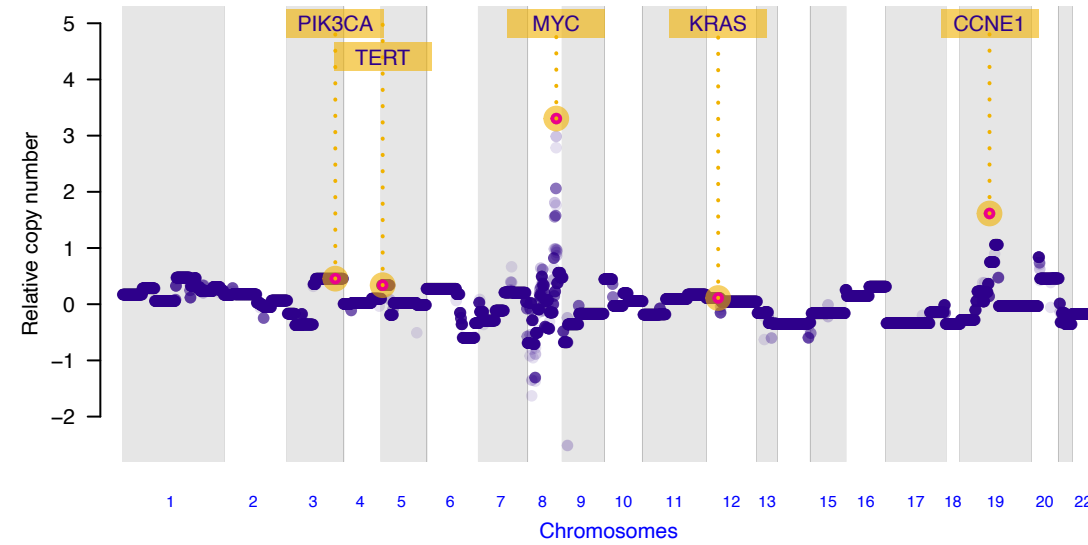

## Spheroids drug response

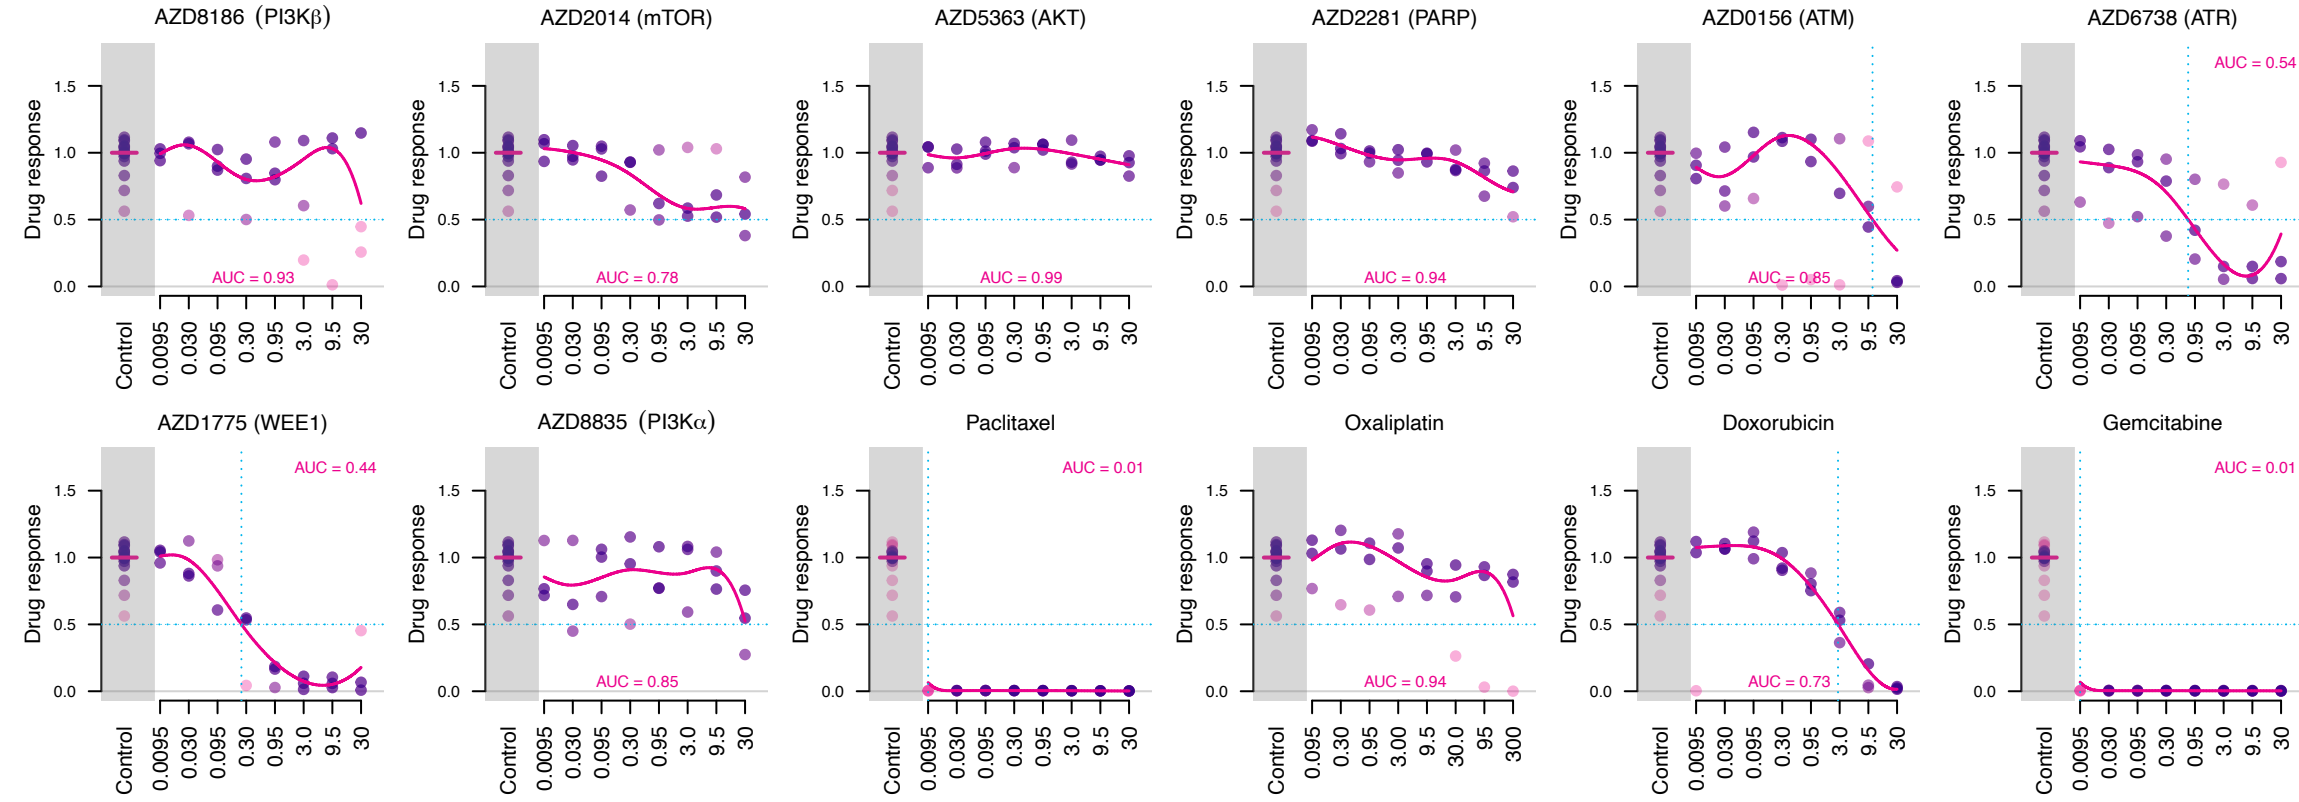

# Supplementary Figure S3h -- Patient 467 -- HGSOC -- Stage III

## Timeline

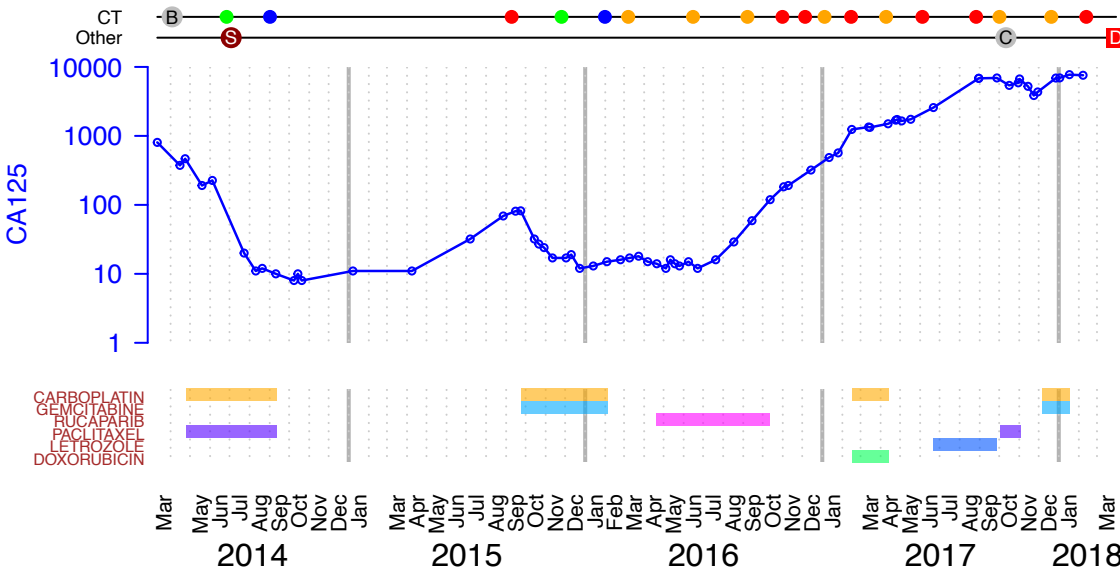

## Tumour Relative Copy Number Profile

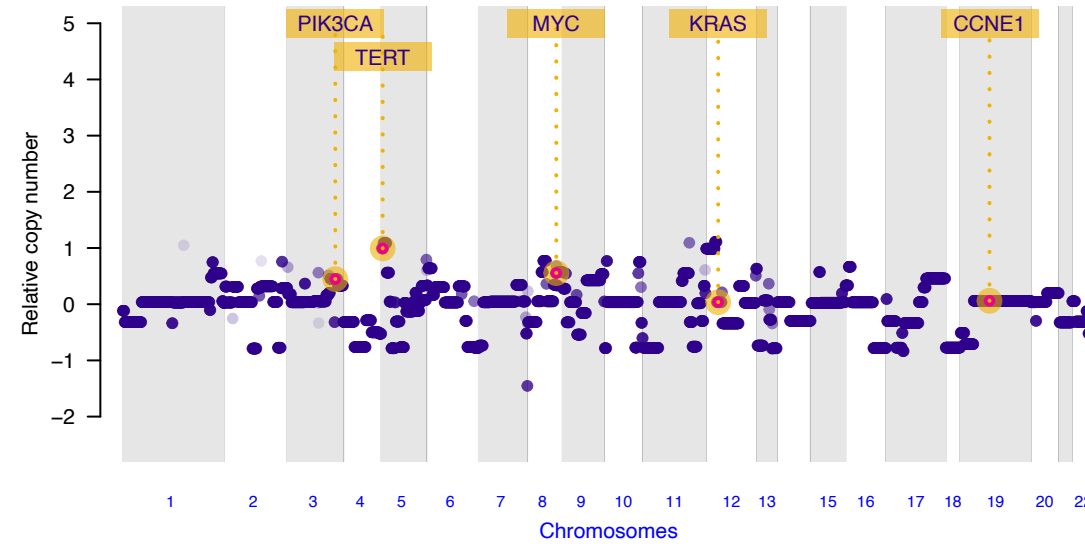

## Spheroids drug response

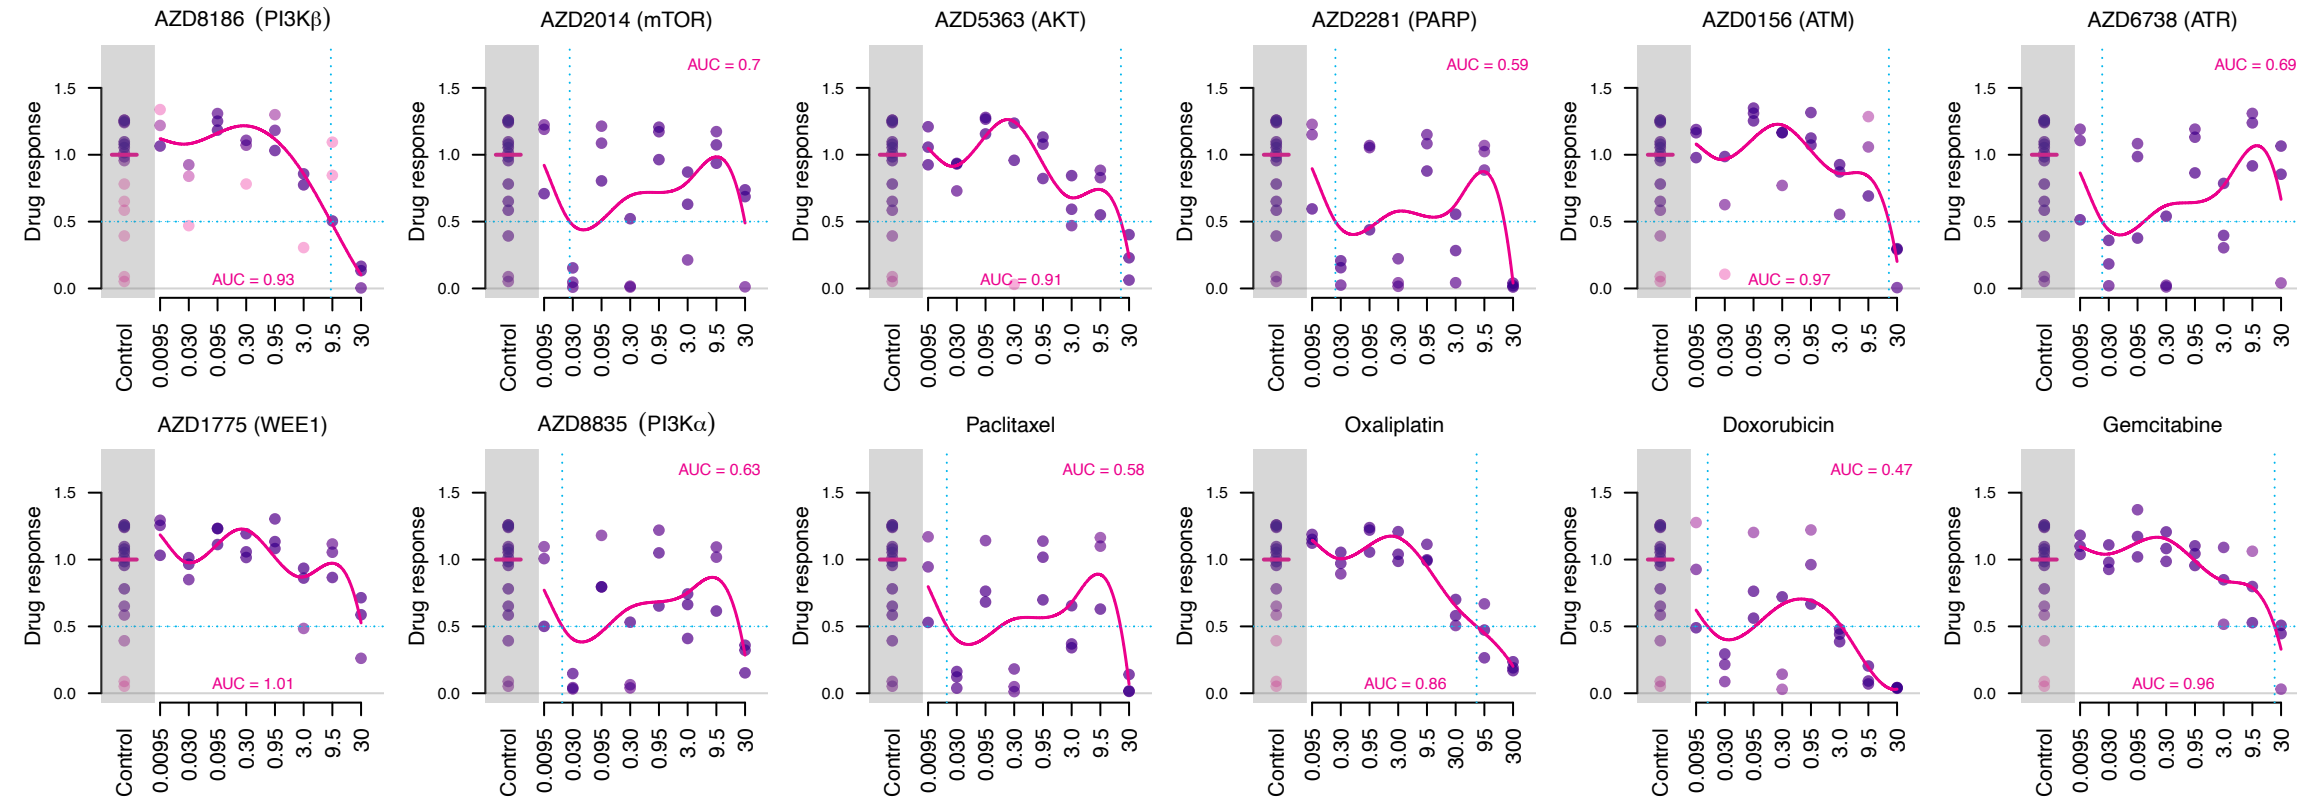

# Supplementary Figure S3i -- Patient 525 -- HGSOC -- Stage IV

## Timeline

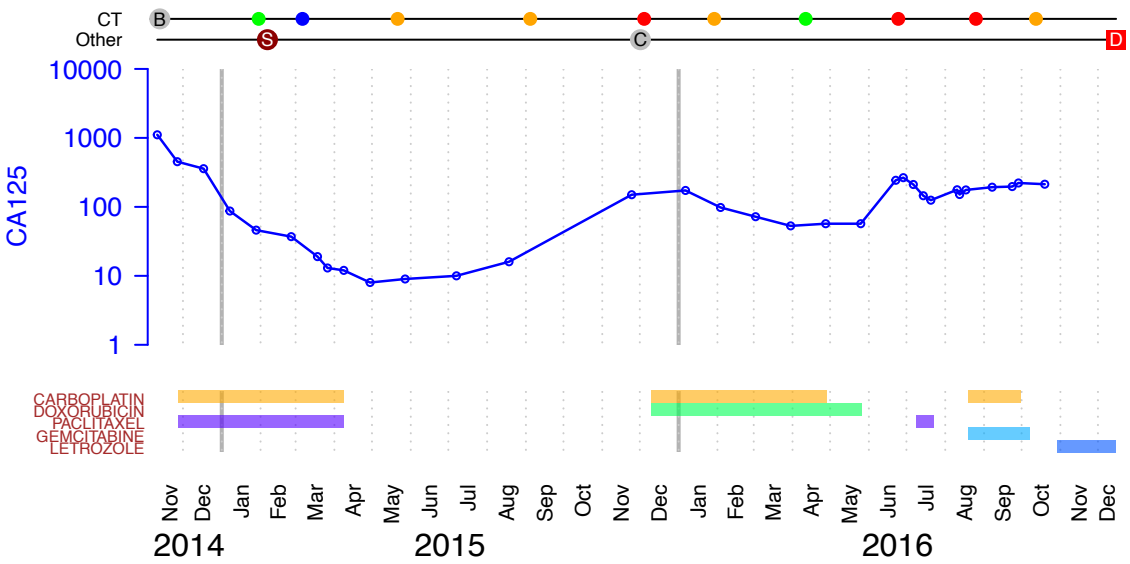

## Tumour Relative Copy Number Profile

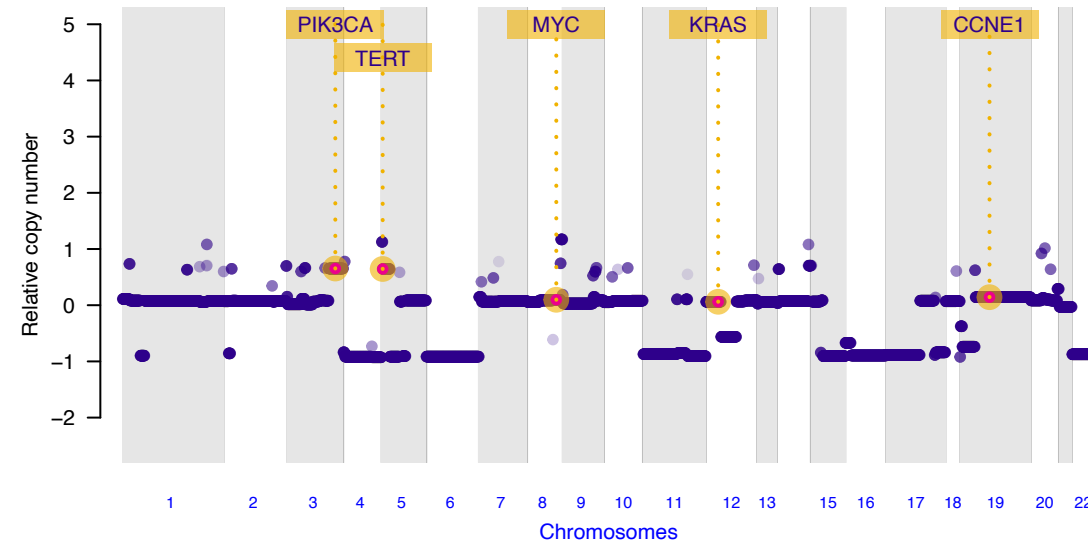

## Spheroids drug response

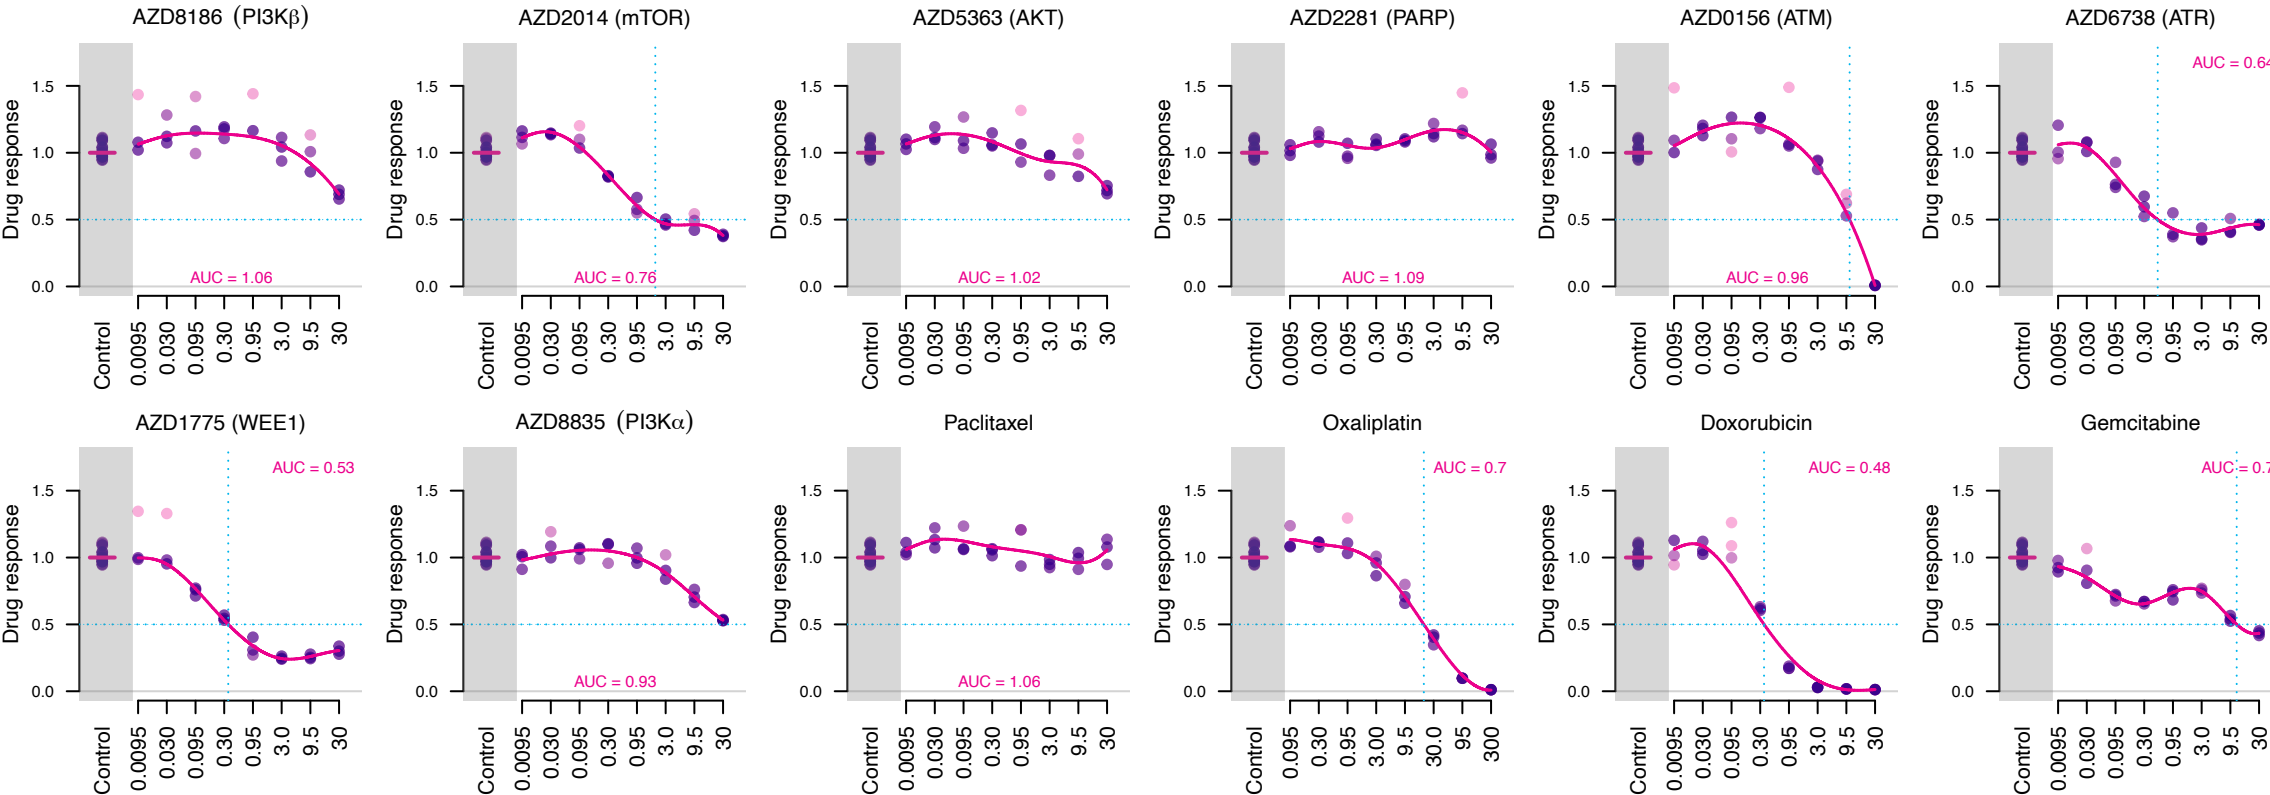

# Supplementary Figure S3j -- Patient 626 -- HGSOC -- Stage III

## Timeline

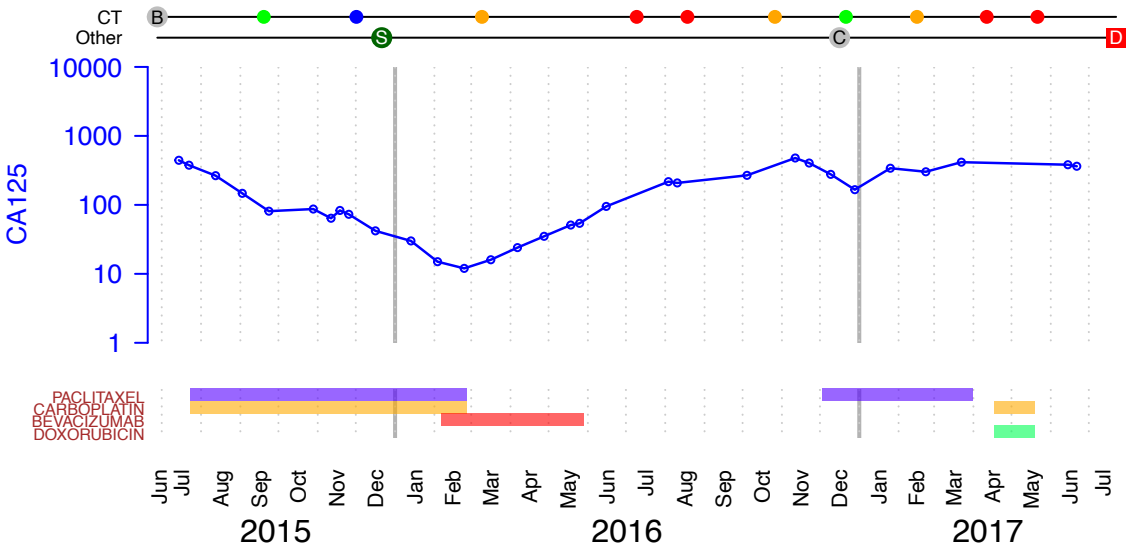

## Tumour Relative Copy Number Profile

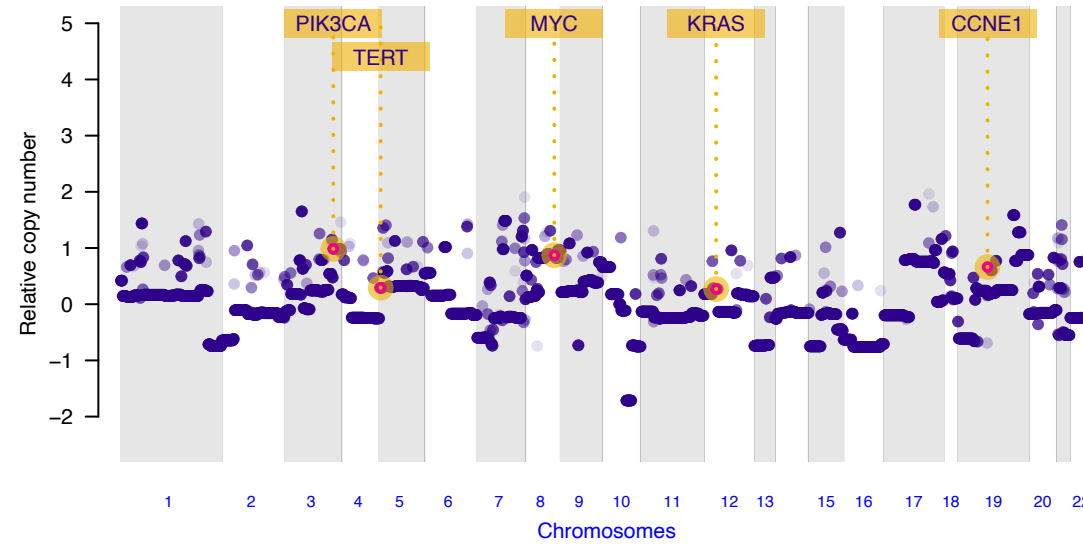

## Spheroids drug response

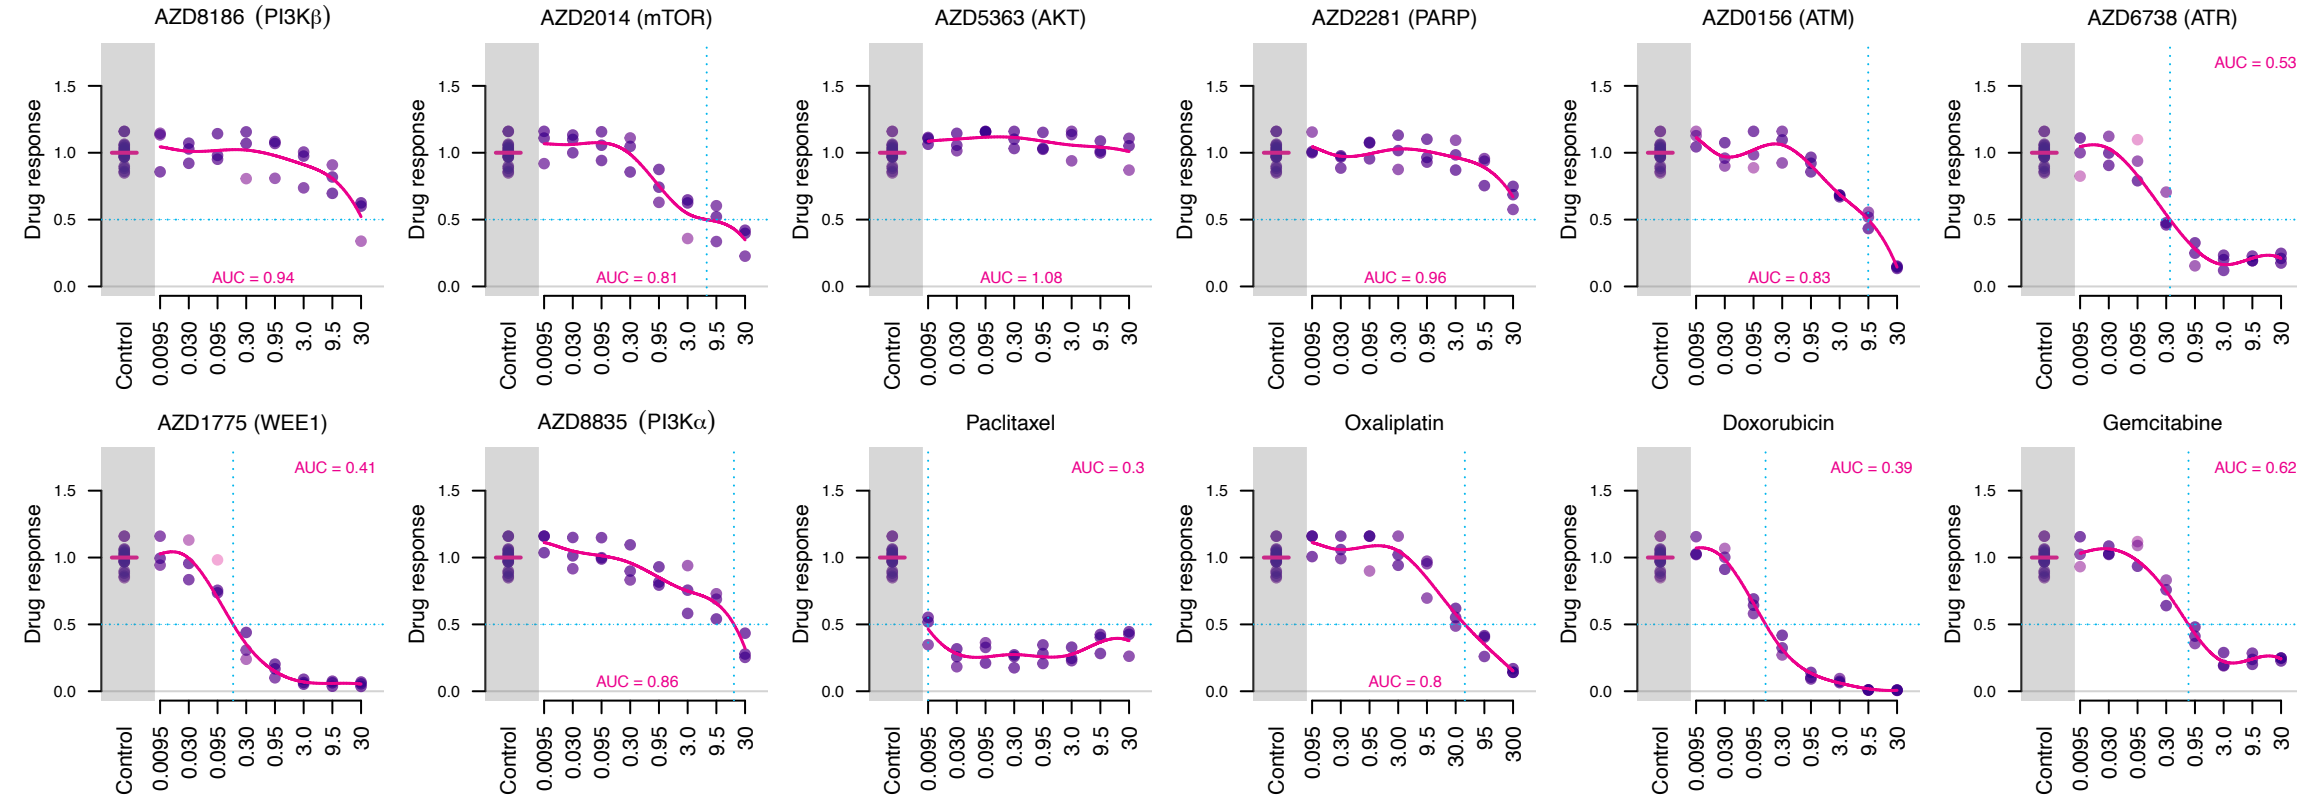

# Supplementary Figure S3k -- Patient 648 -- HGSOC -- Stage III

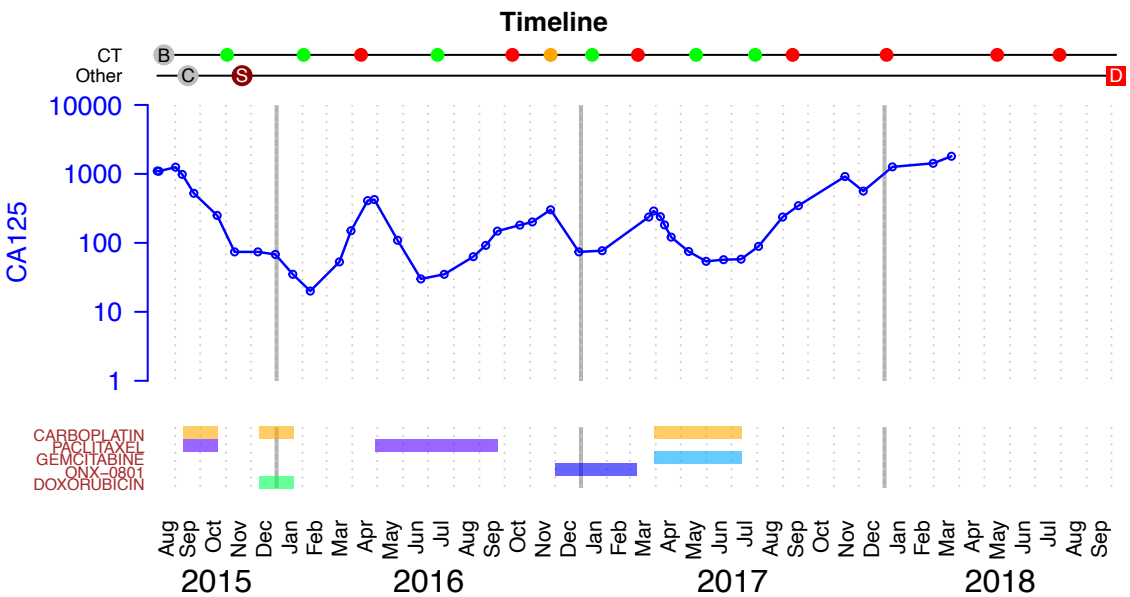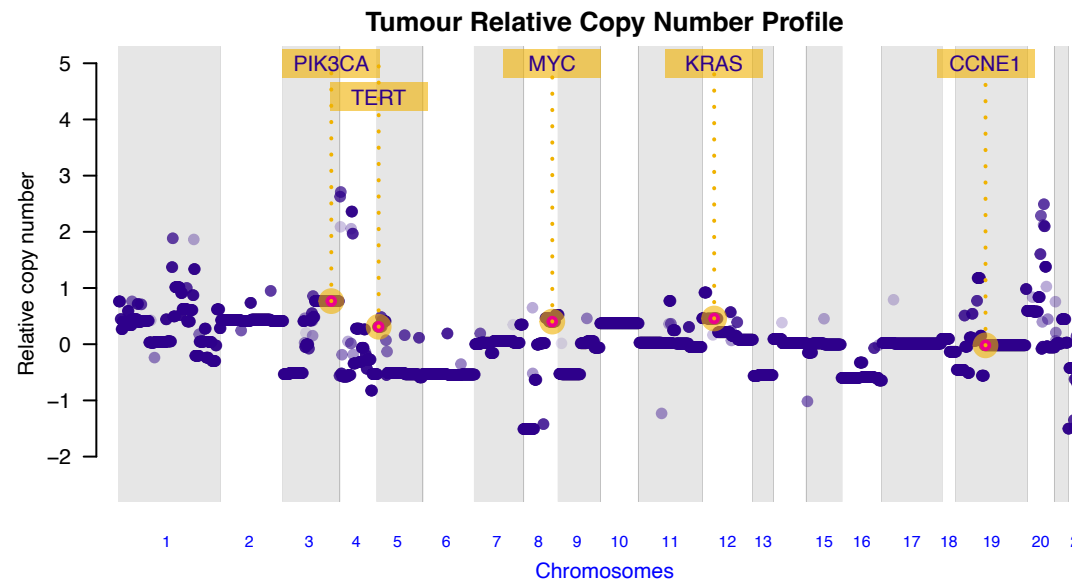

### Spheroids drug response

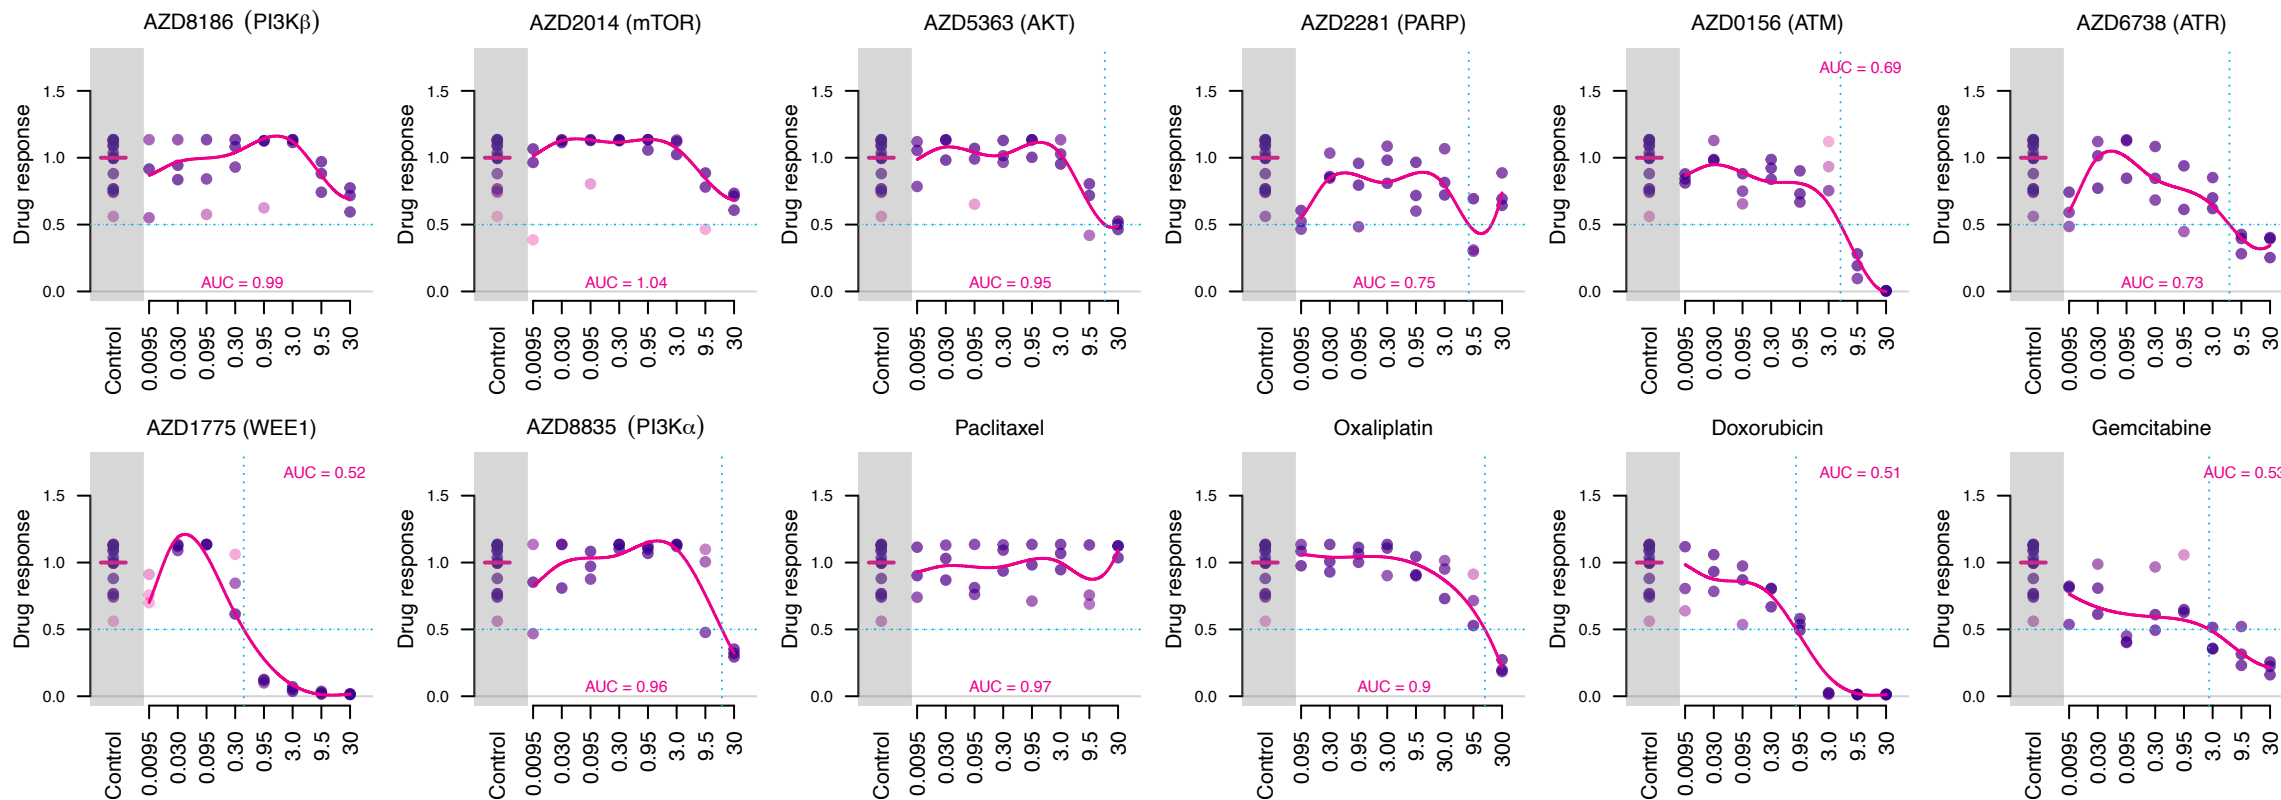

# Supplementary Figure S3I -- Patient 669 -- HGSOC -- Stage IV

## Timeline

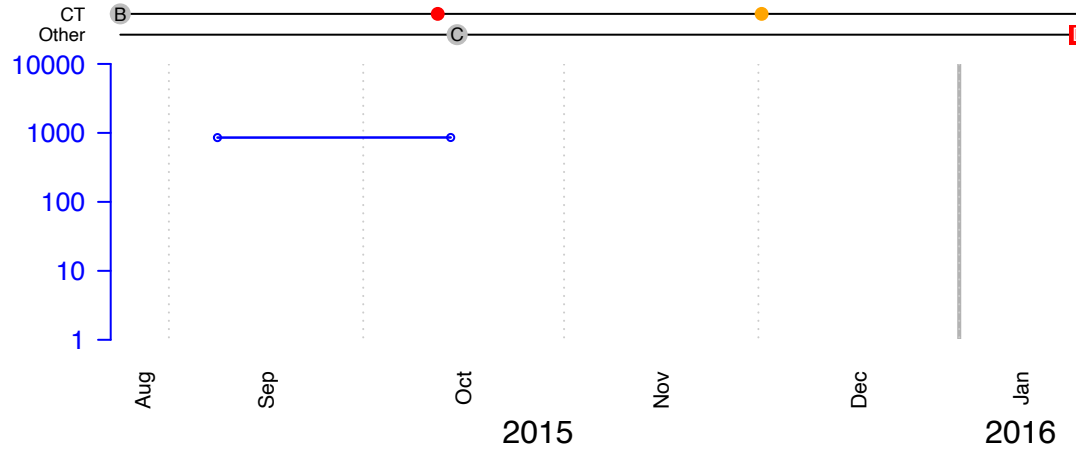

## Tumour Relative Copy Number Profile

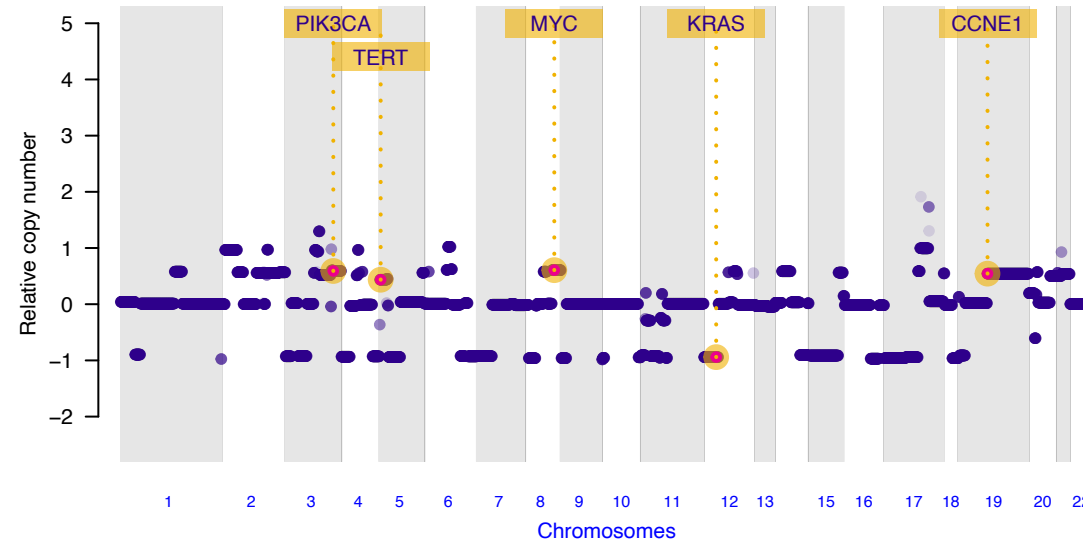

## Spheroids drug response

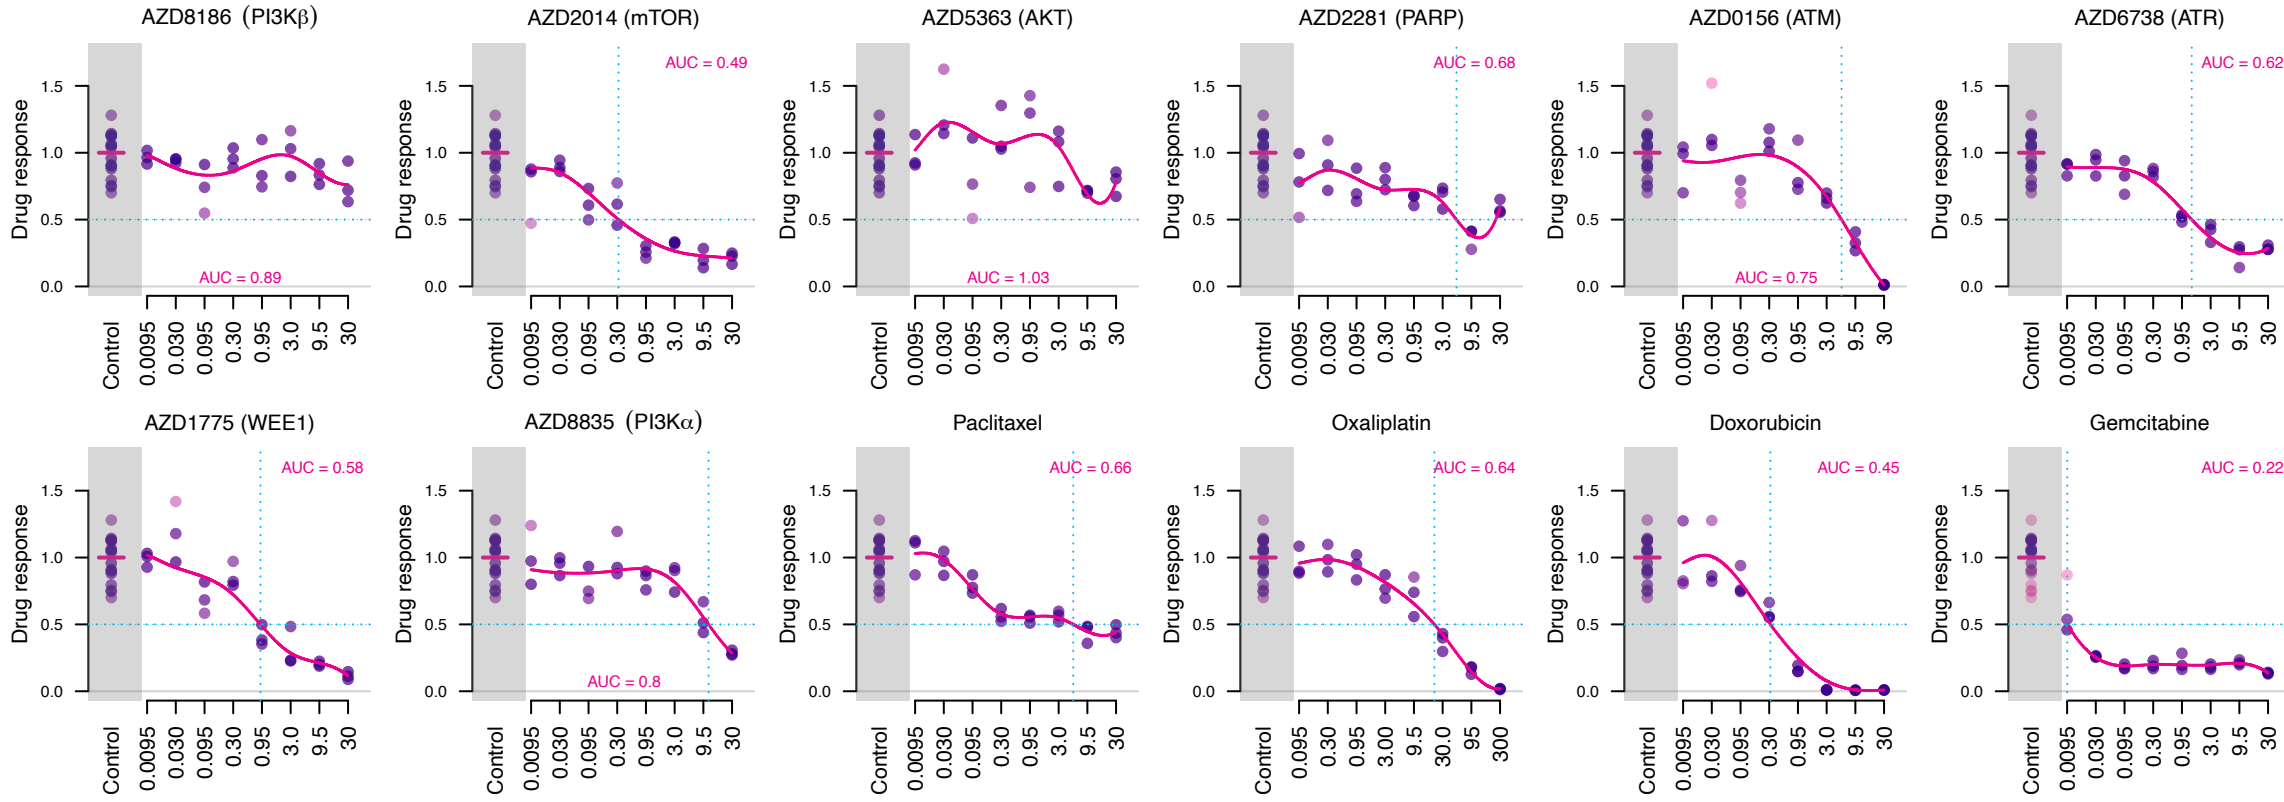

# Supplementary Figure S3m -- Patient 687 -- HGSOC -- Stage III

## Timeline

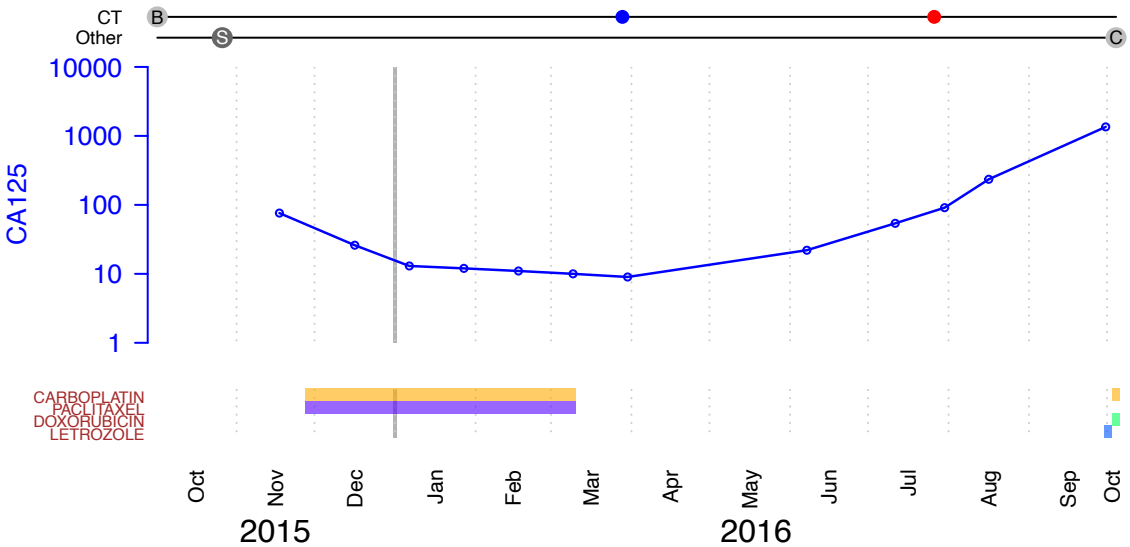

## Tumour Relative Copy Number Profile

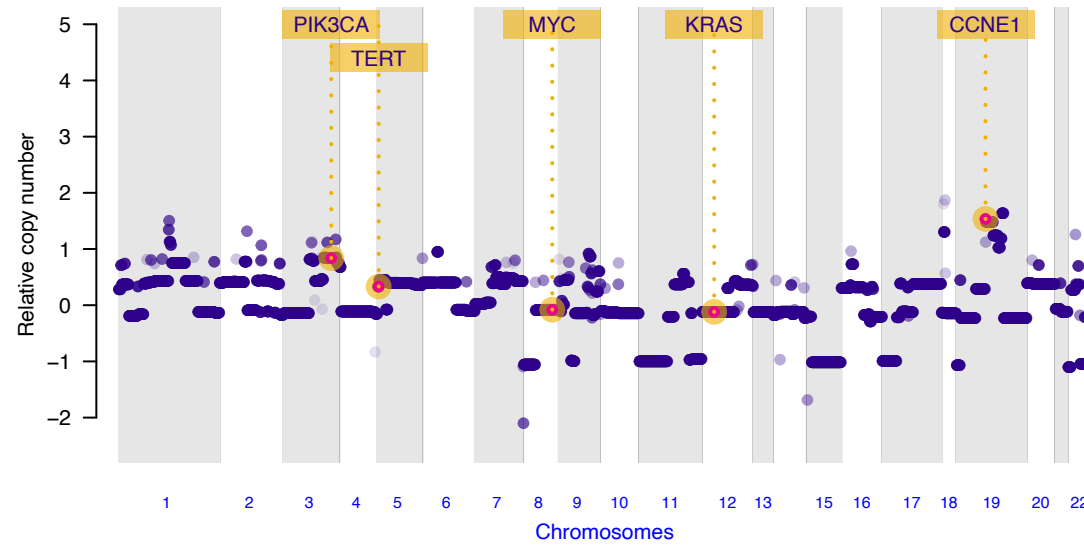

## Spheroids drug response

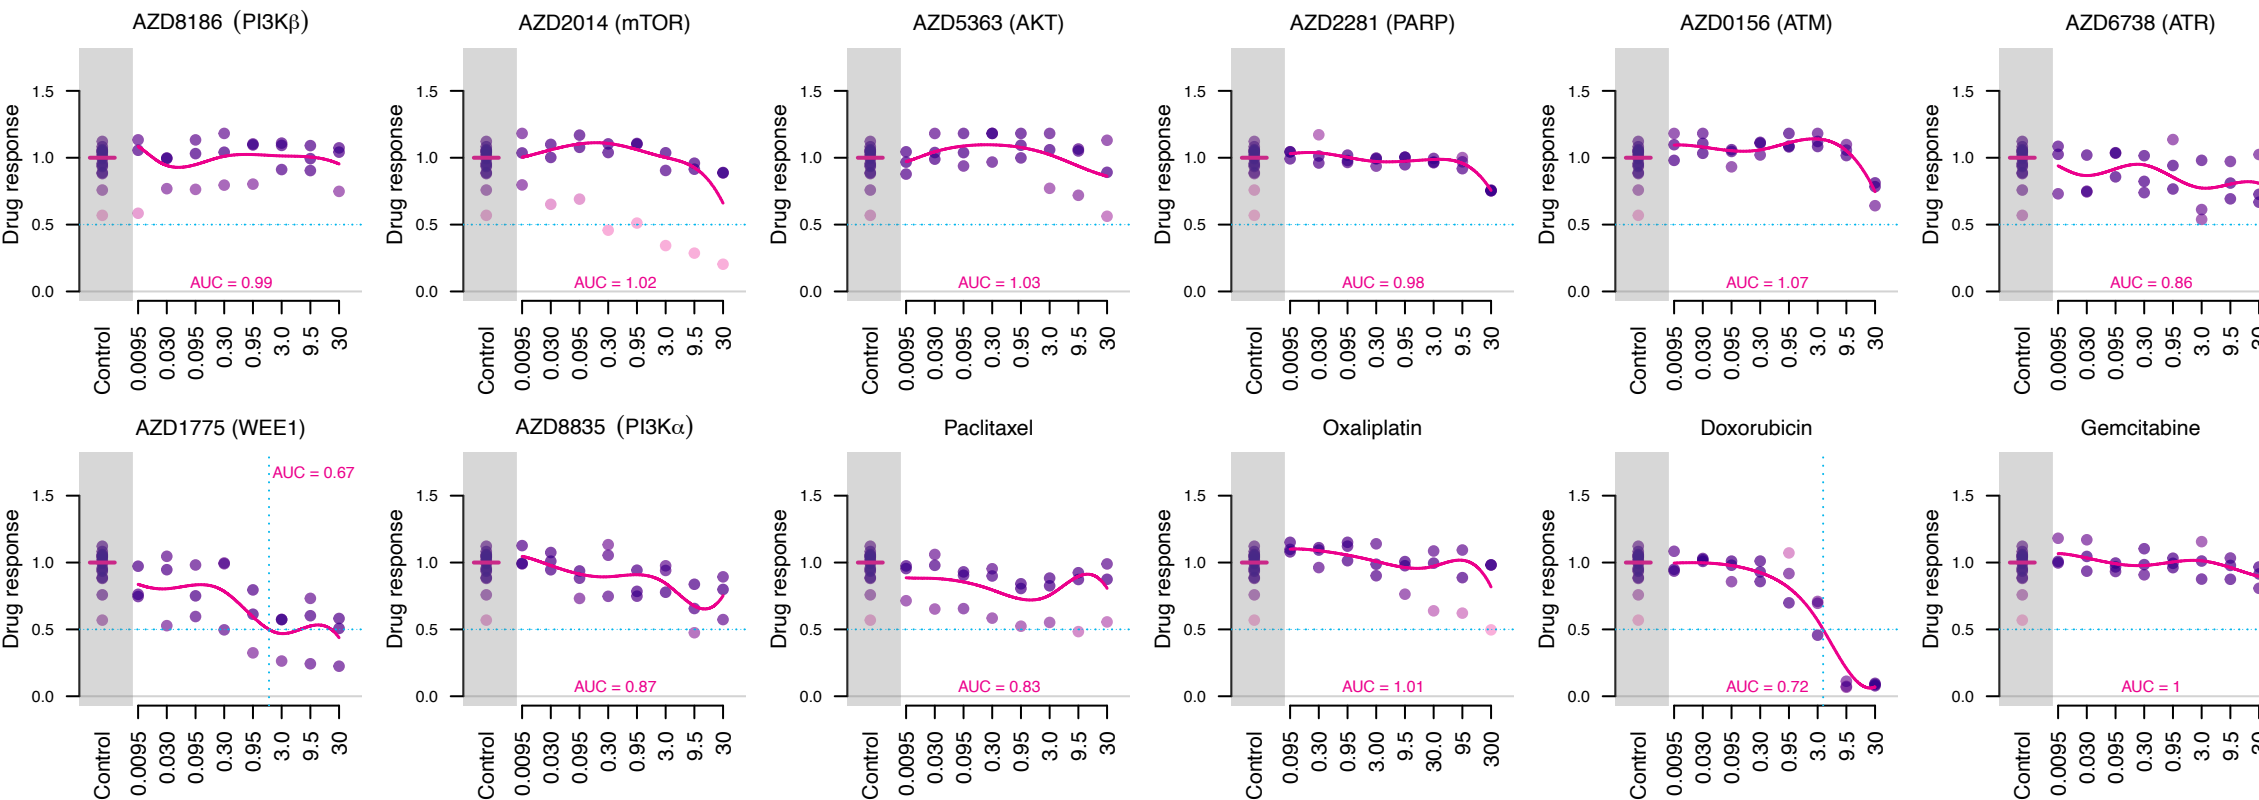



# Supplementary Figure S3n -- Patient 720 -- HGSOC -- Stage III

## Timeline

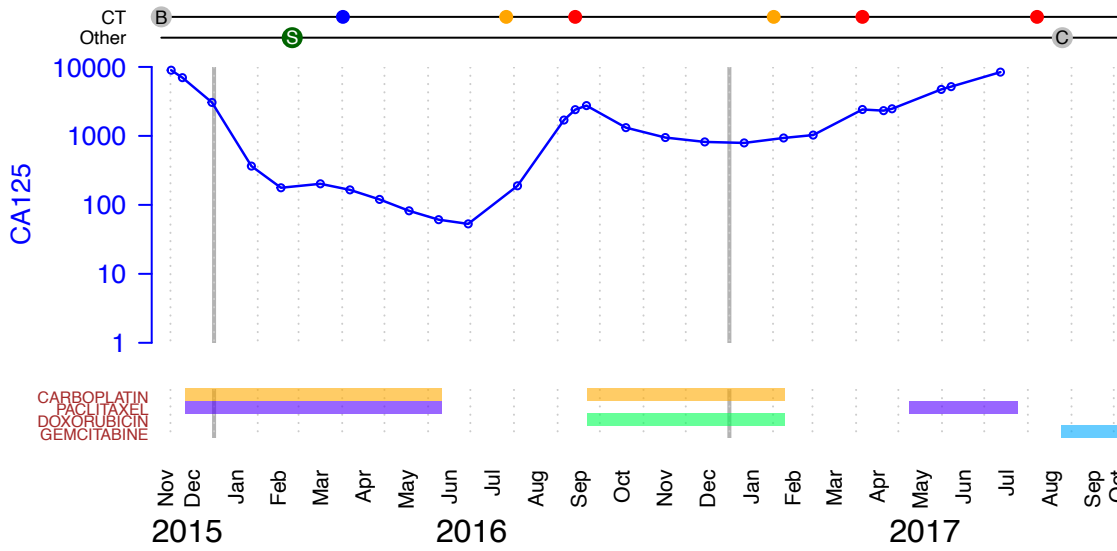

## Tumour Relative Copy Number Profile

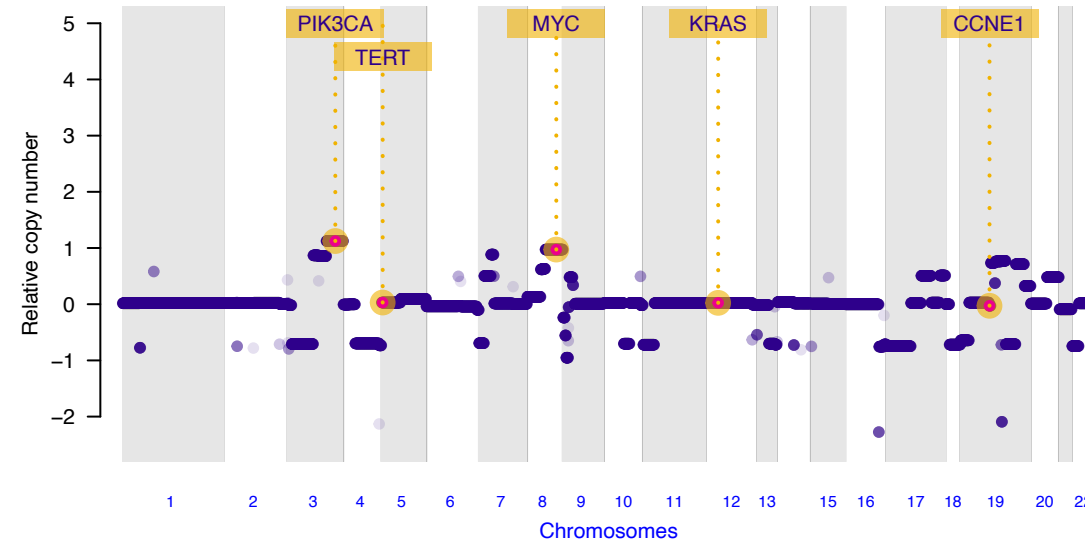

## Spheroids drug response

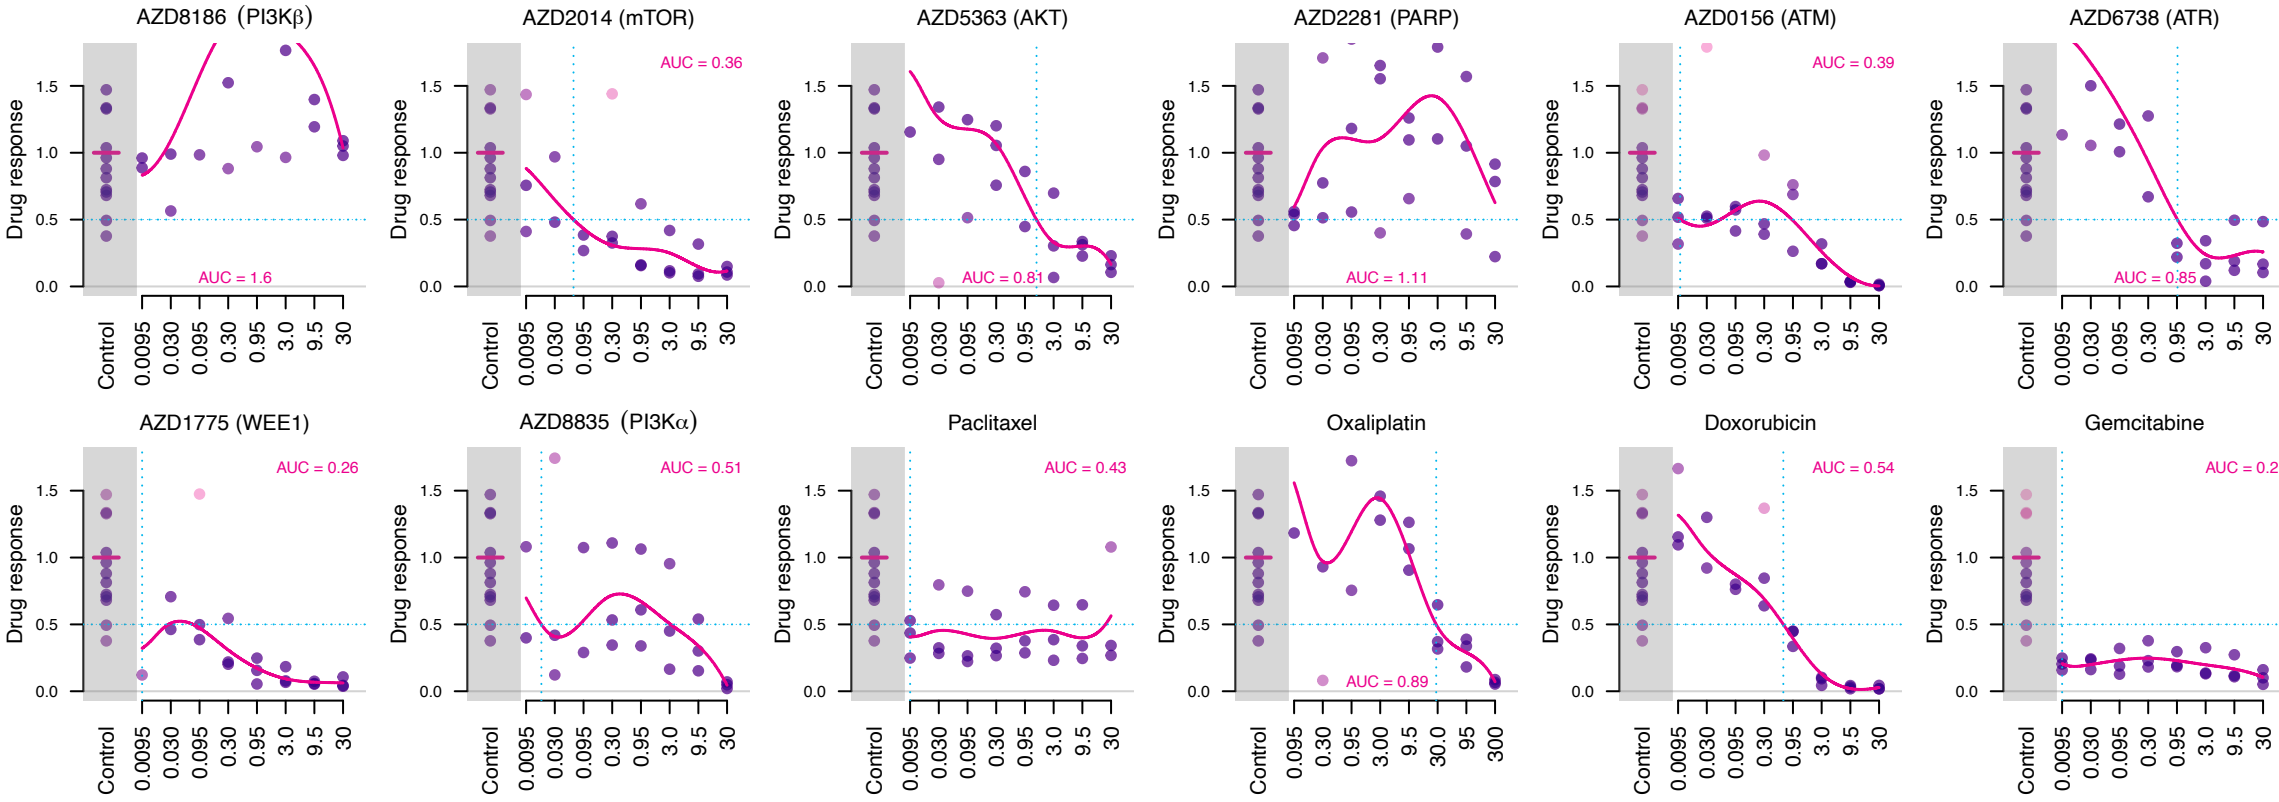

# Supplementary Figure S3o -- Patient 783 -- HGS undifferentiated -- Stage NA

## Timeline

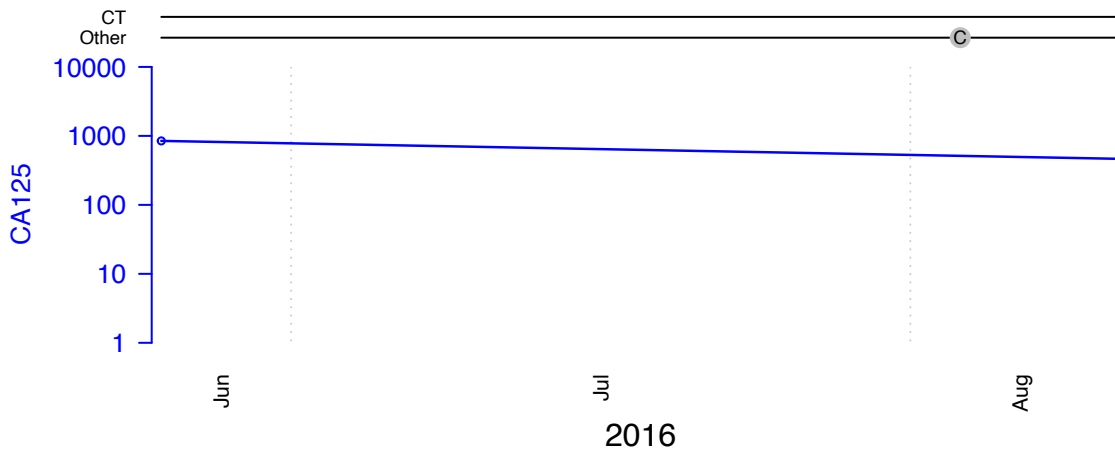

## Tumour Relative Copy Number Profile

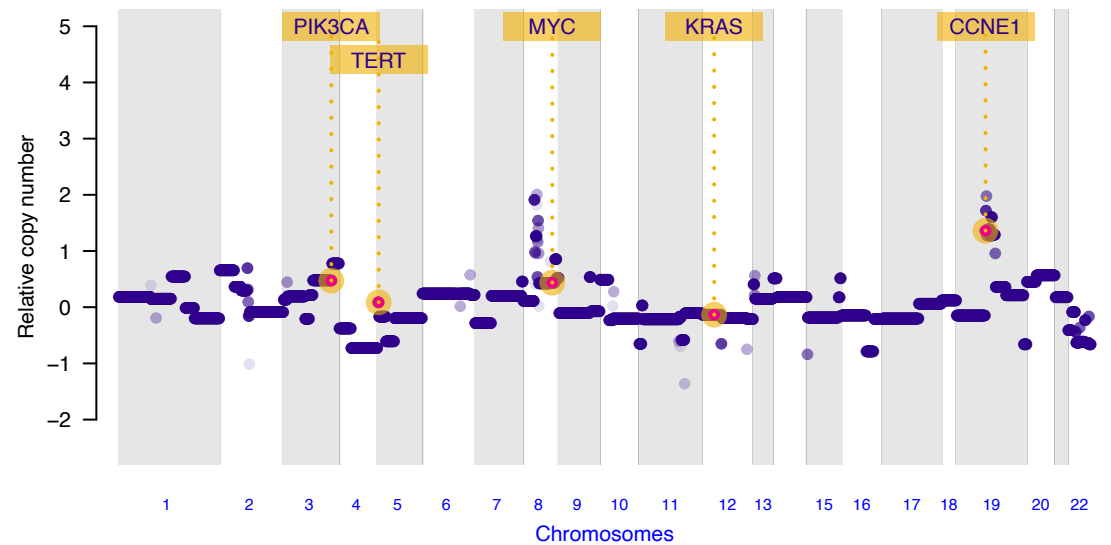

## Spheroids drug response

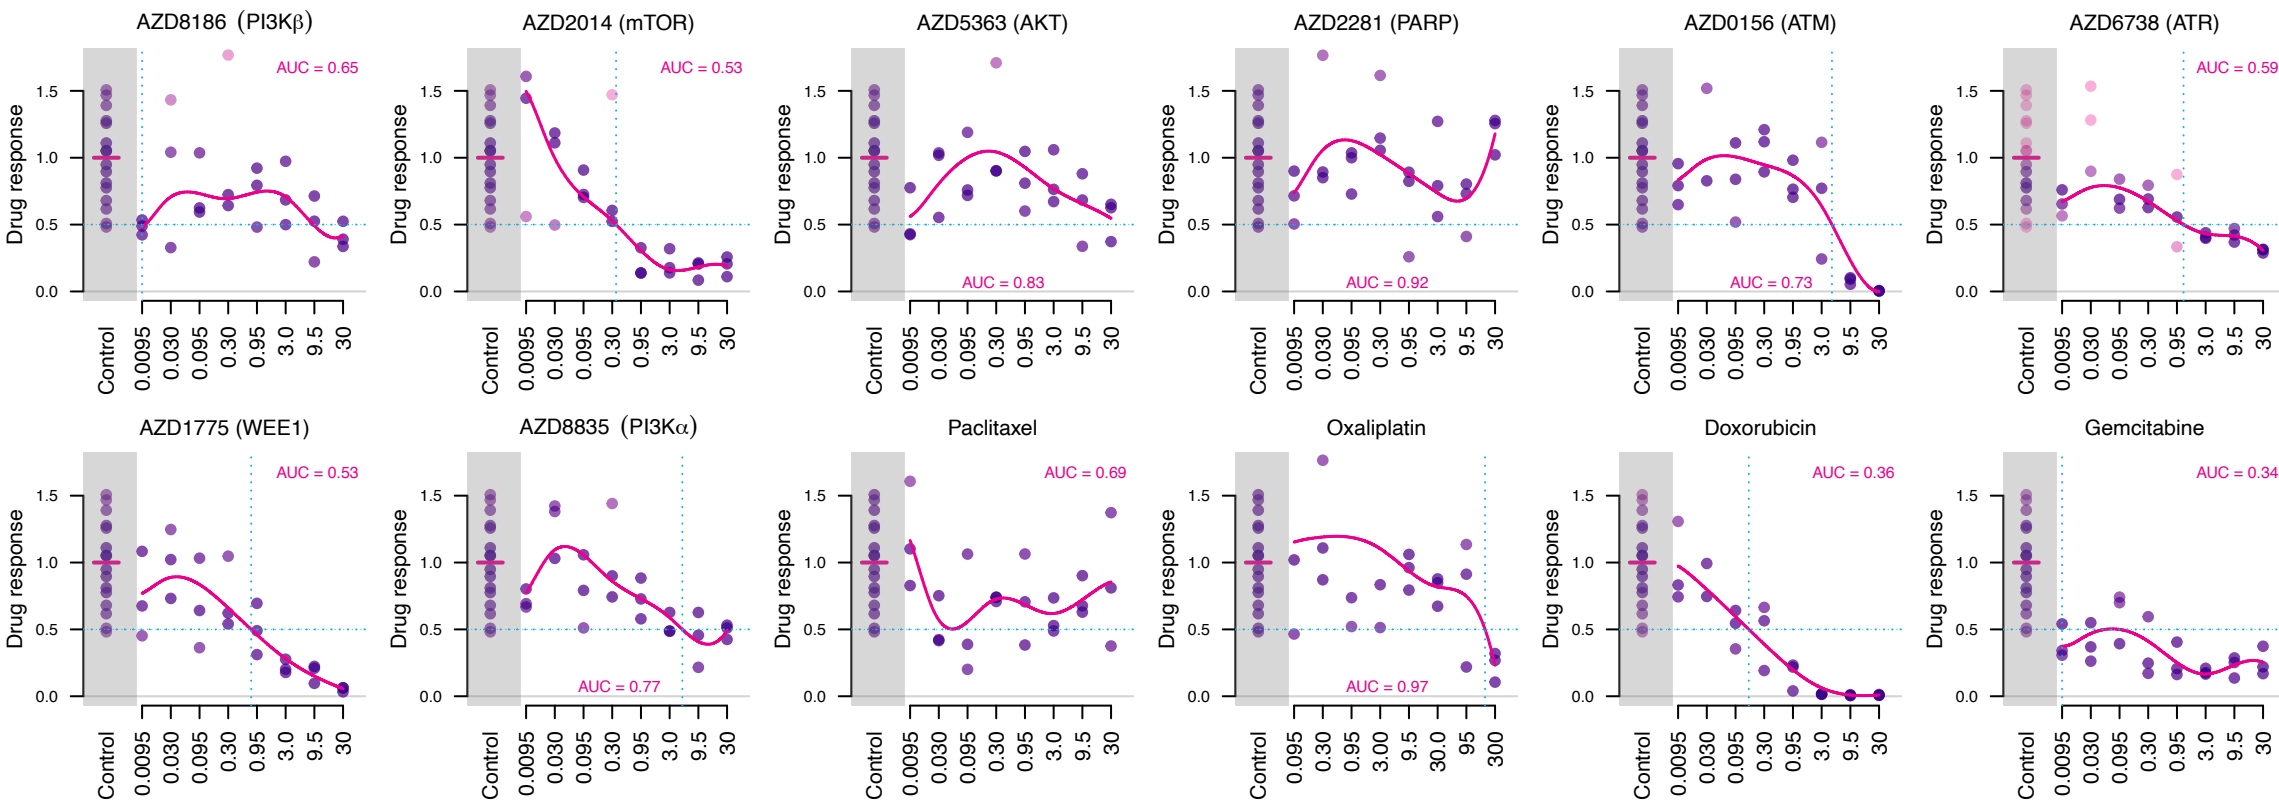

# Supplementary Figure S3p -- Patient 788 -- HGSOC -- Stage IV

## Timeline

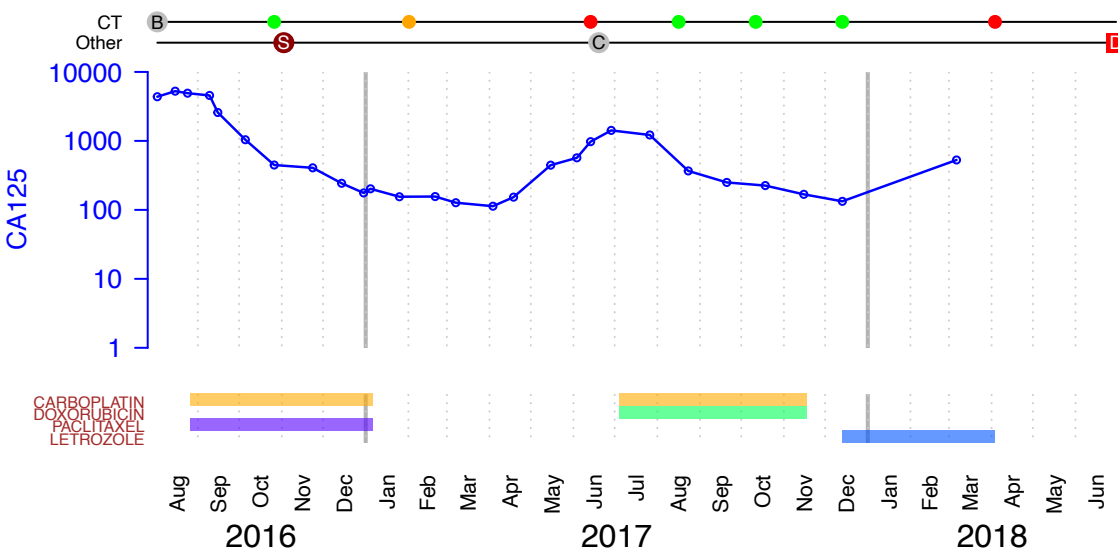

## Tumour Relative Copy Number Profile

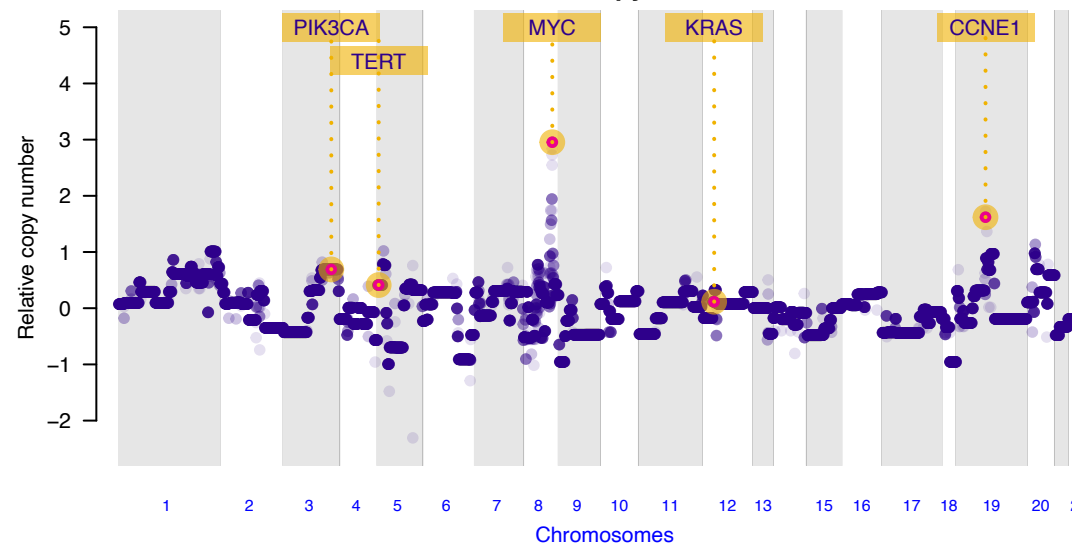

## Spheroids drug response

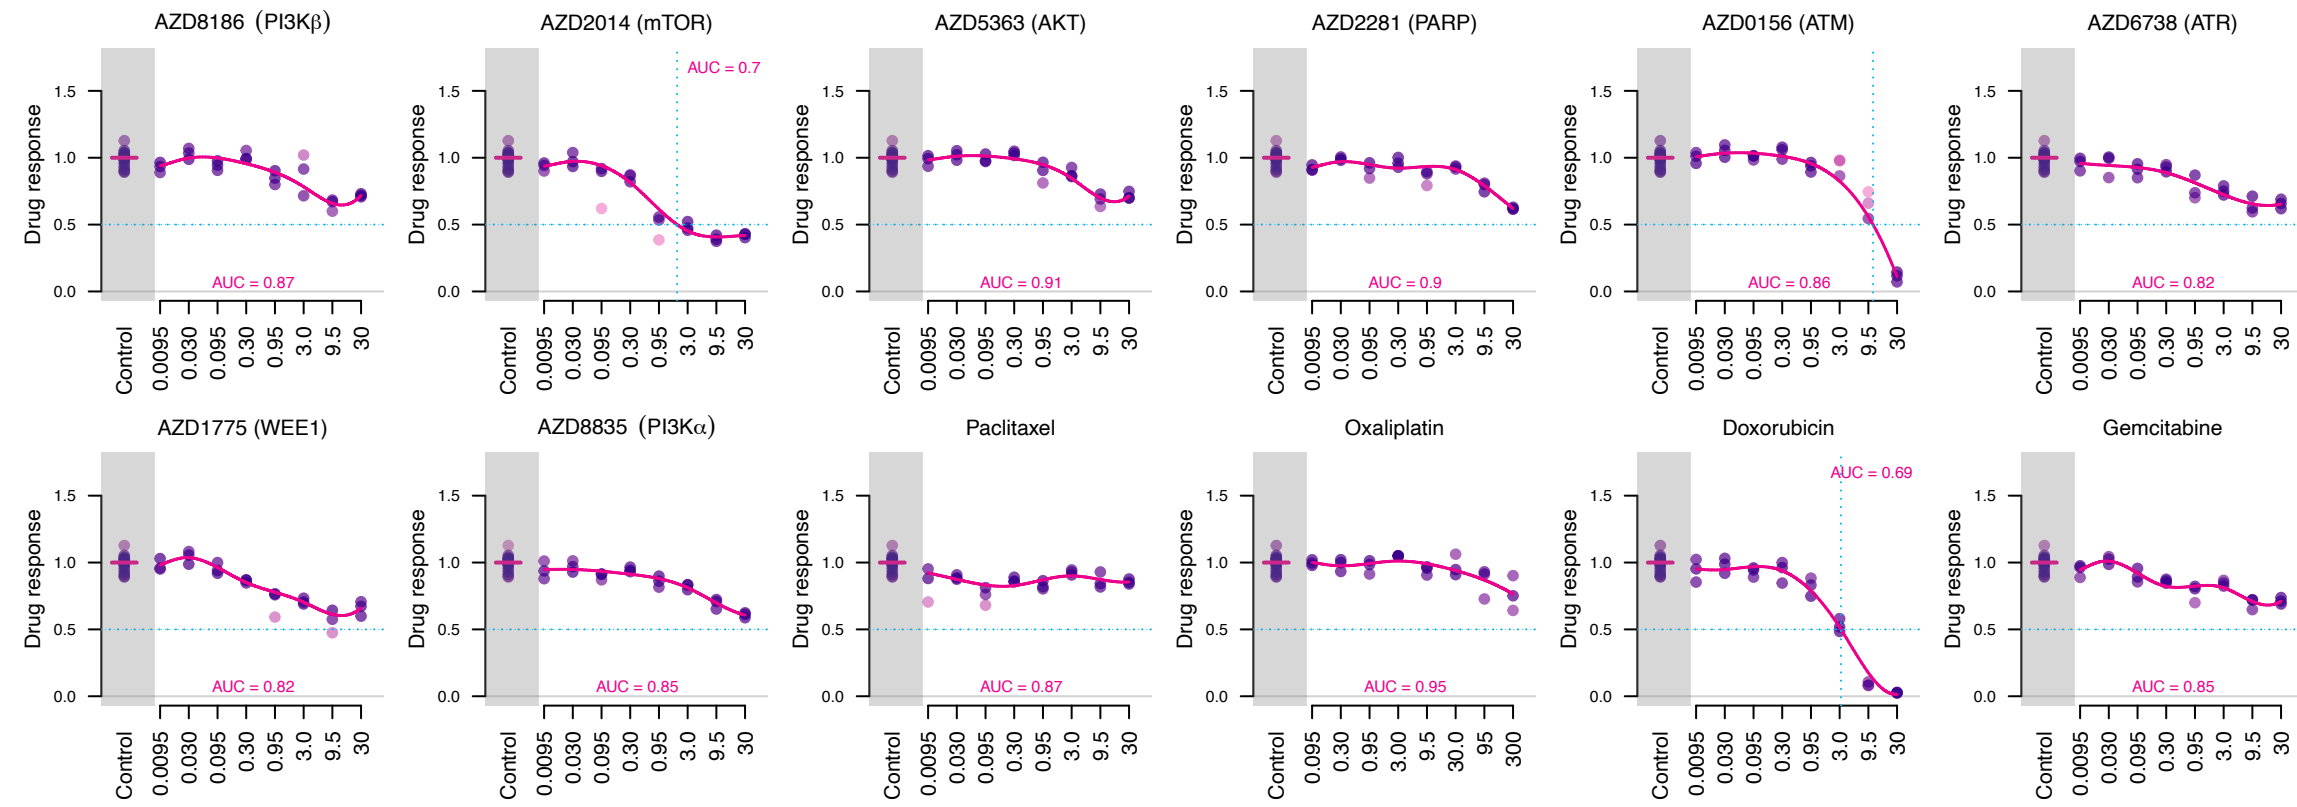

# Supplementary Figure S3q -- Patient 800 -- HGS Peritoneum -- Stage III

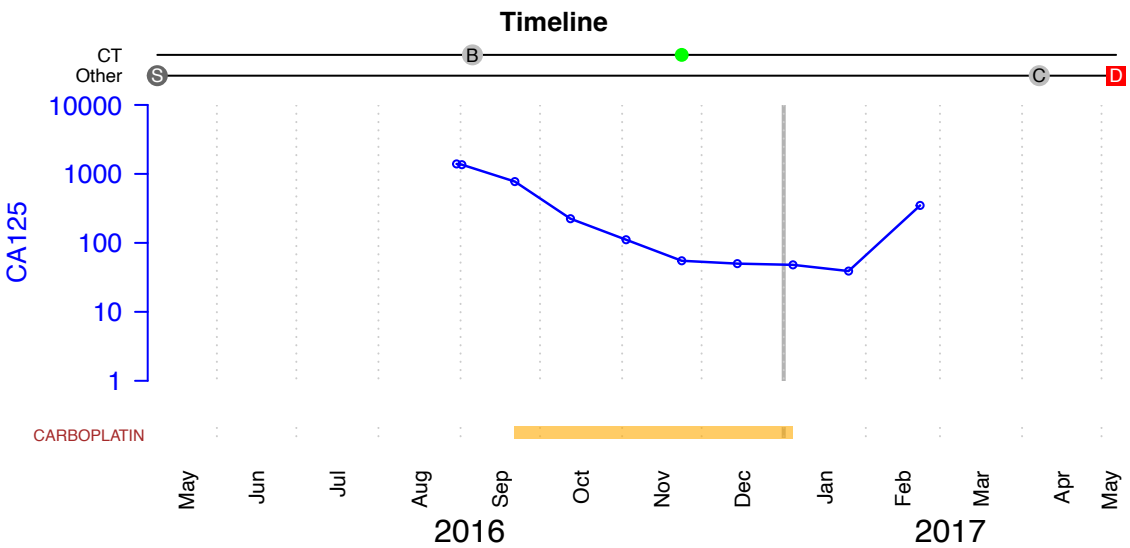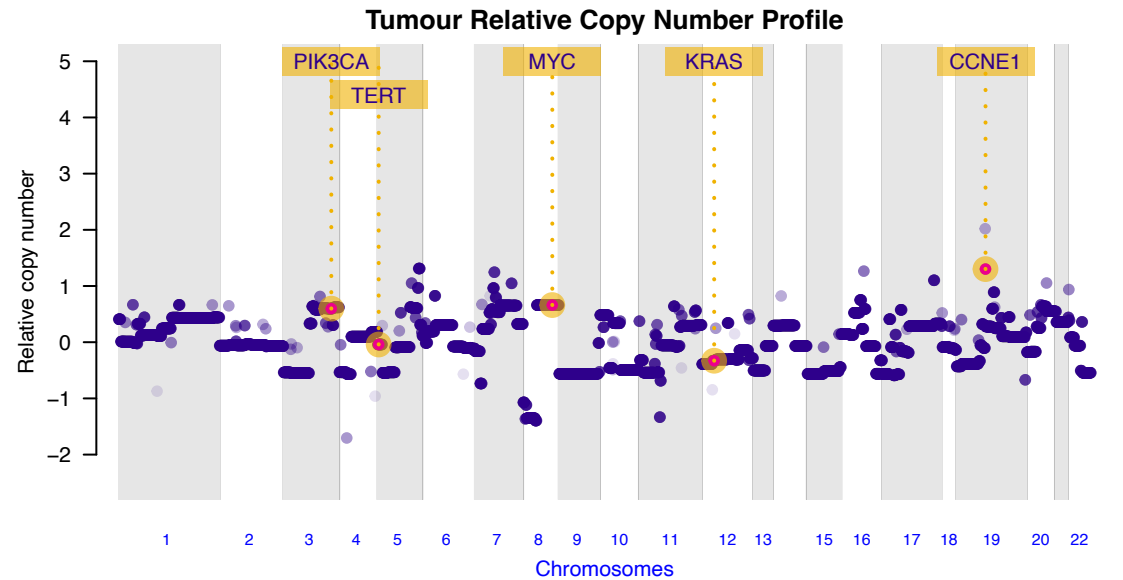

### Spheroids drug response

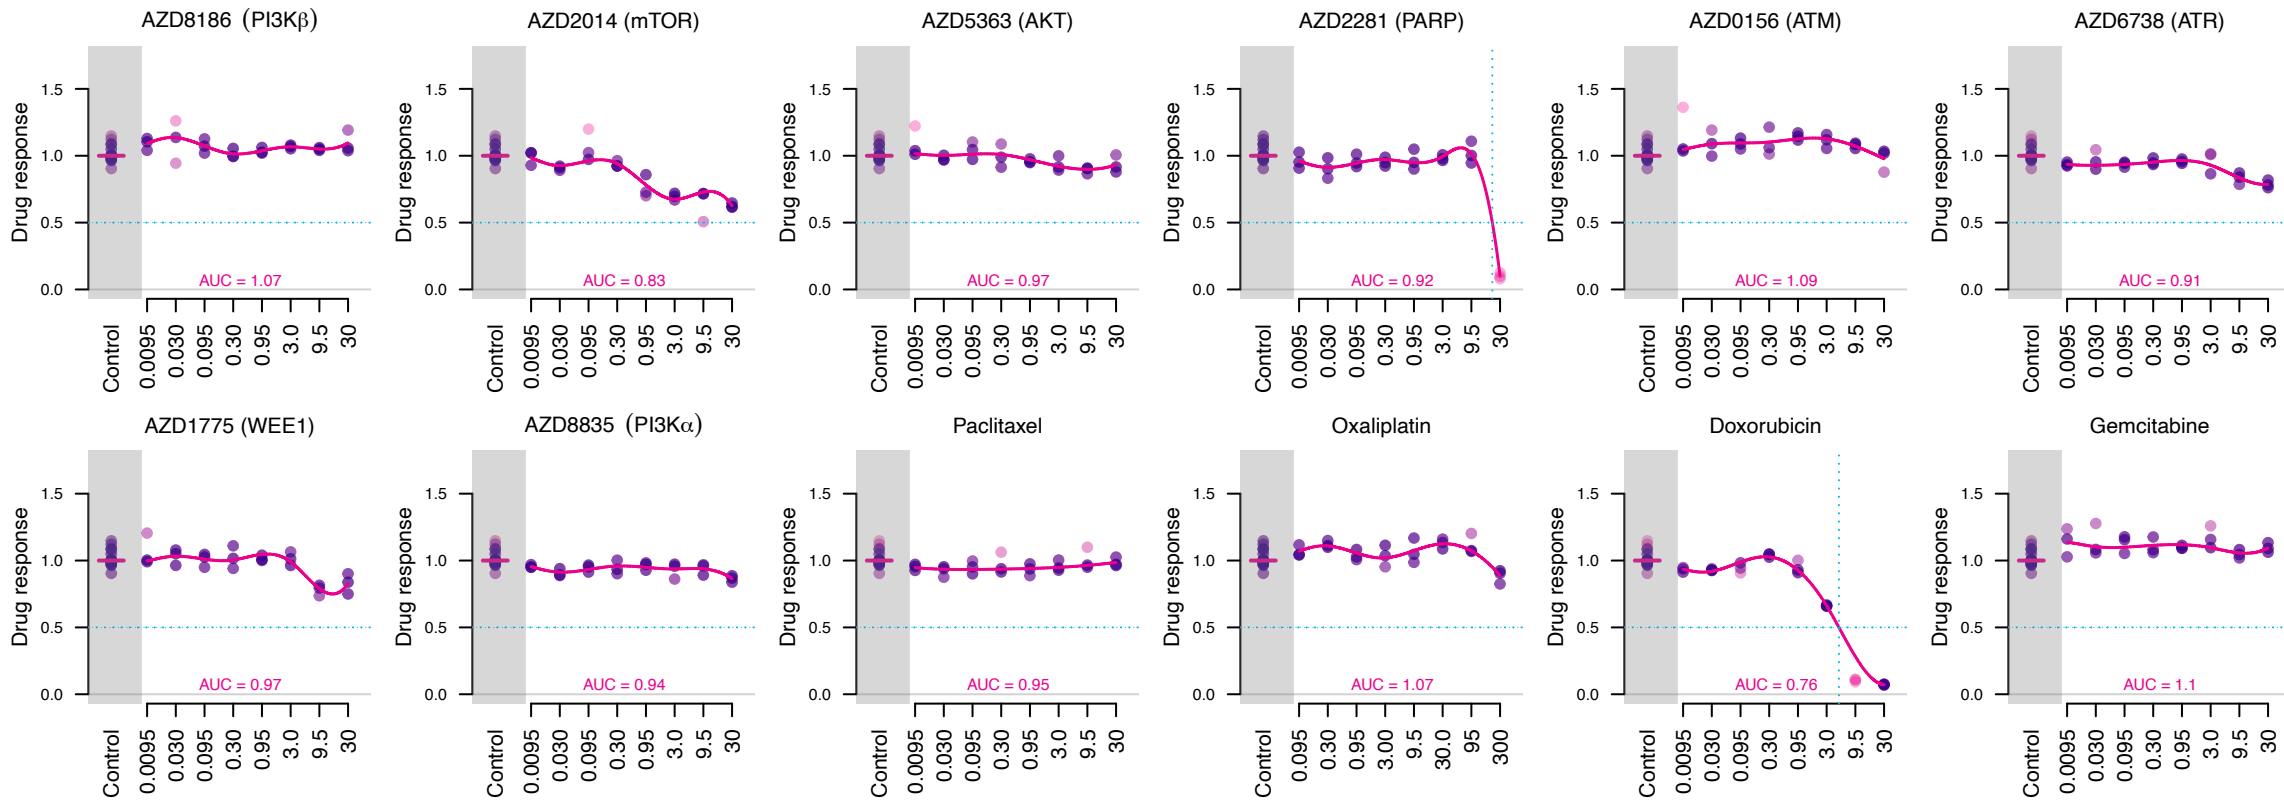

# Supplementary Figure S3r -- Patient 819 -- HGSOC -- Stage III

## Timeline

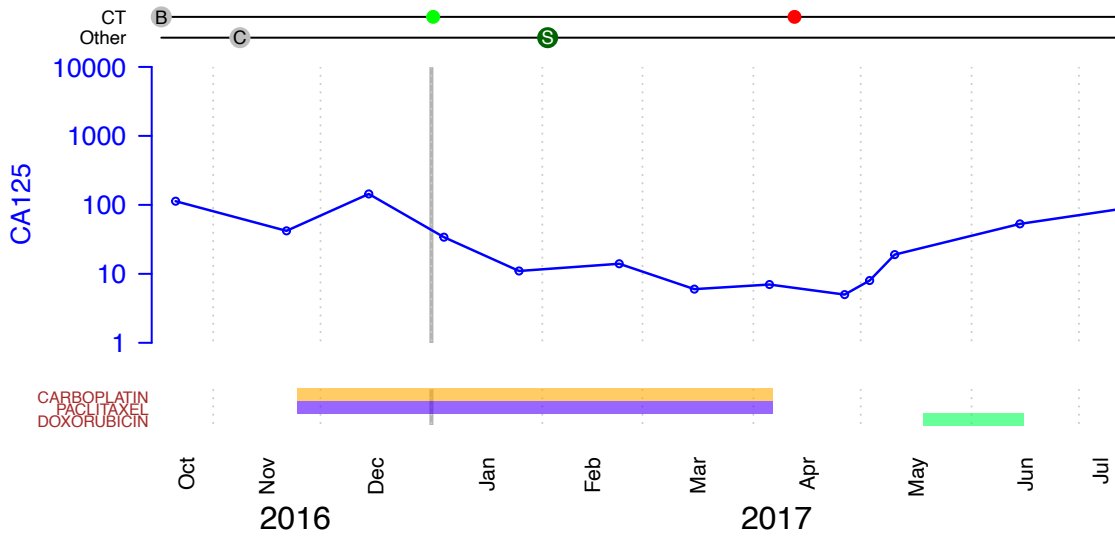

## Tumour Relative Copy Number Profile

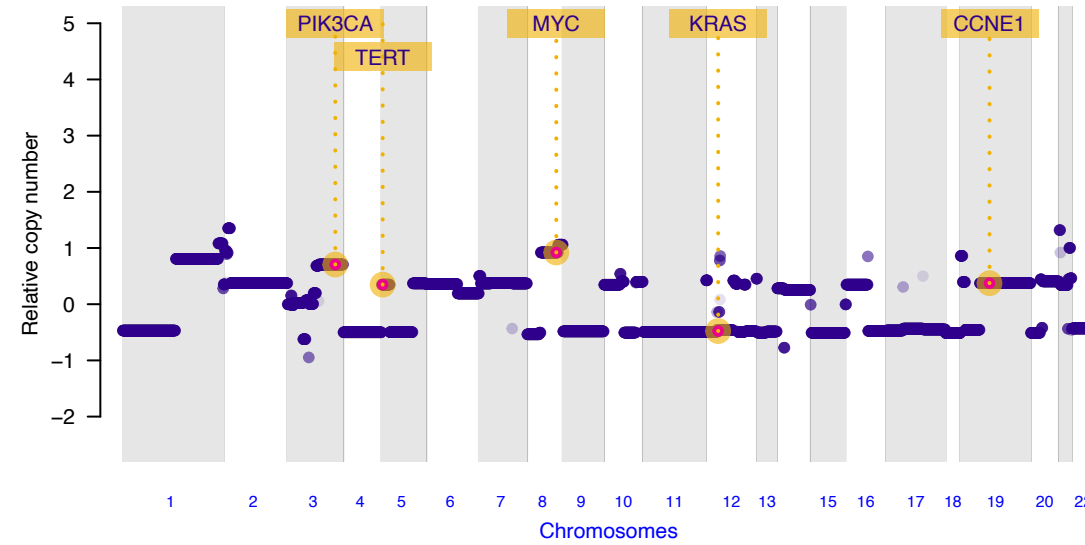

## Spheroids drug response

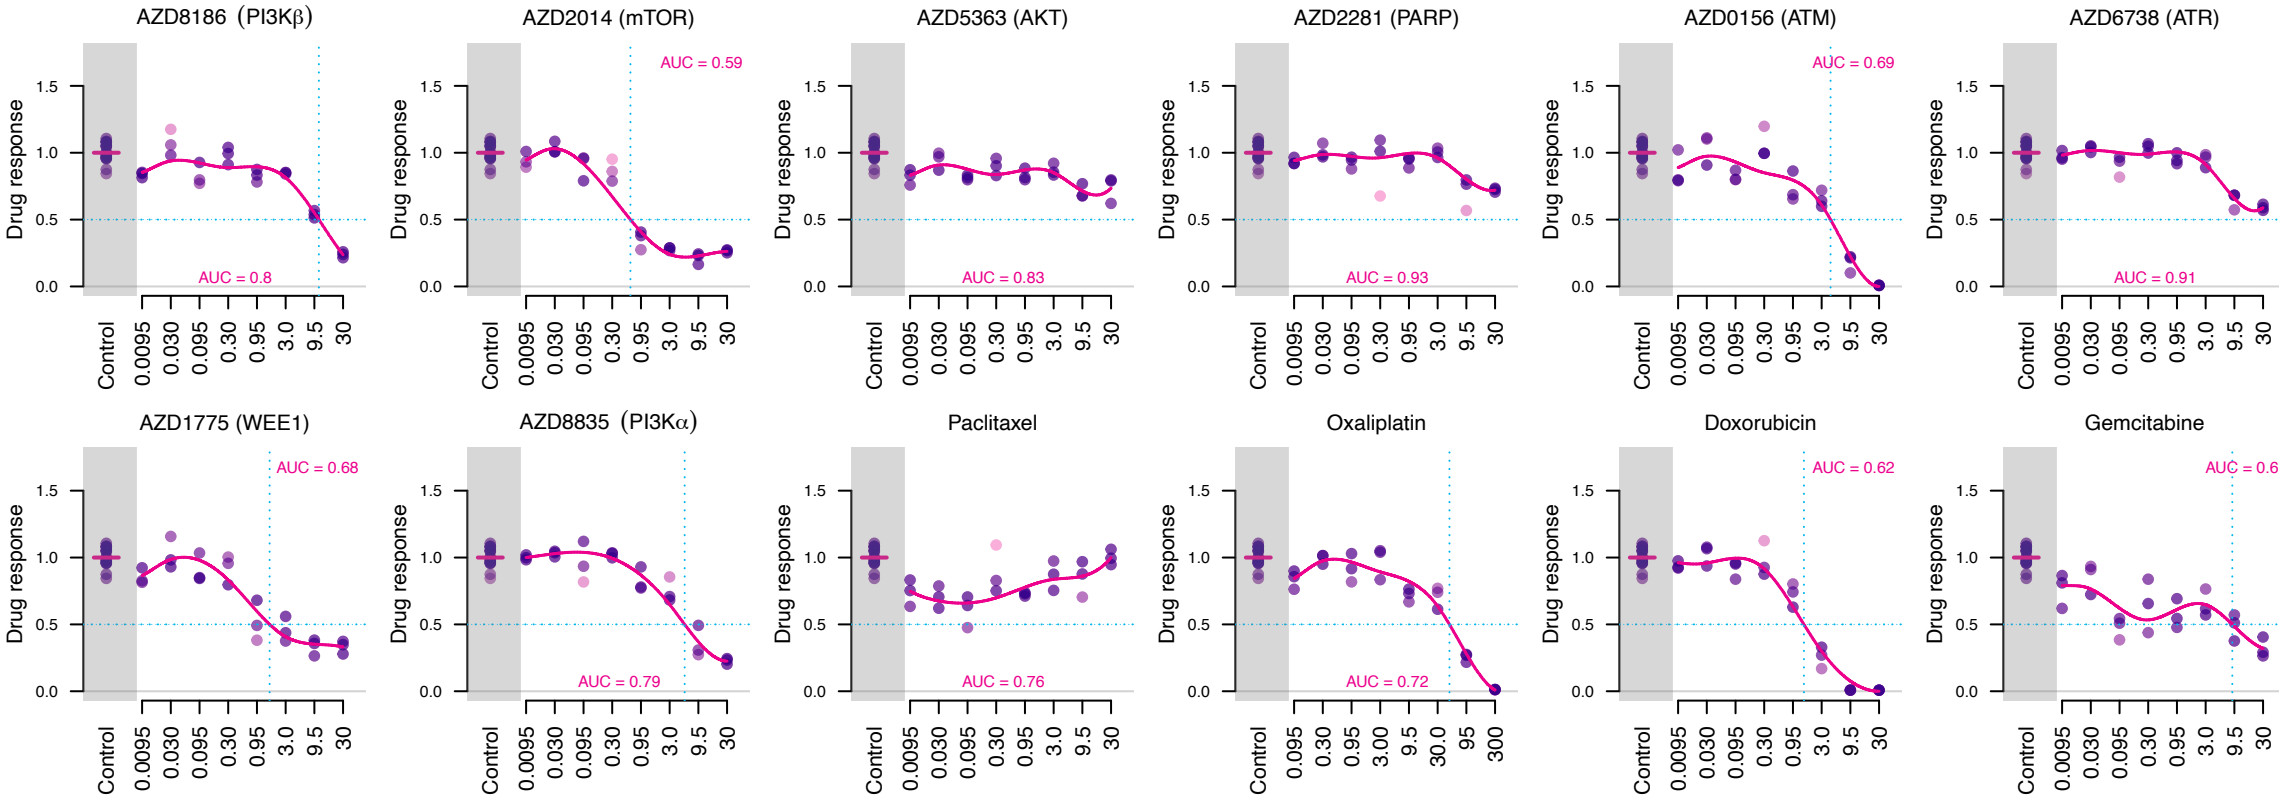

# Supplementary Figure S3s -- Patient 839 -- HGSOc -- Stage III

## Timeline

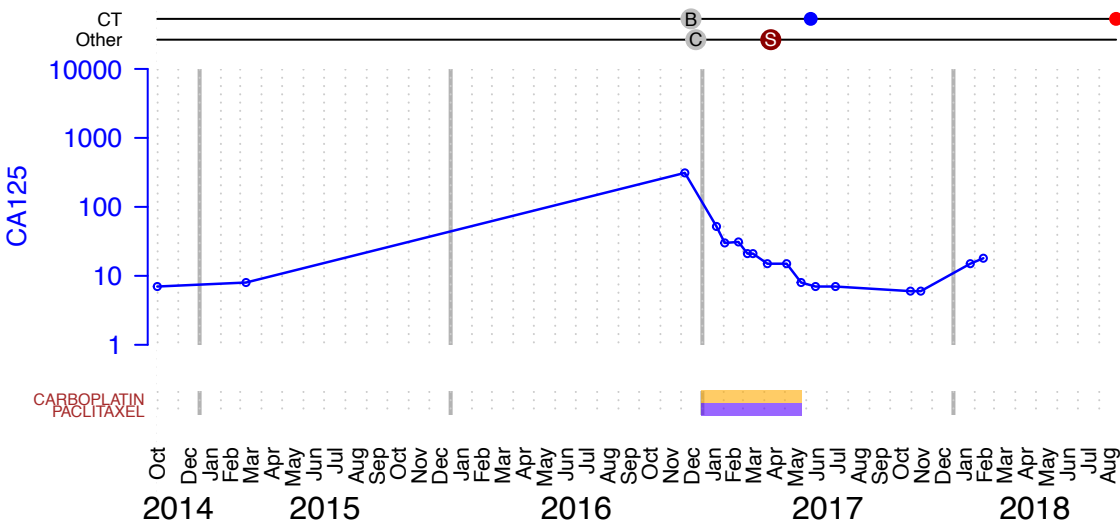

## Tumour Relative Copy Number Profile

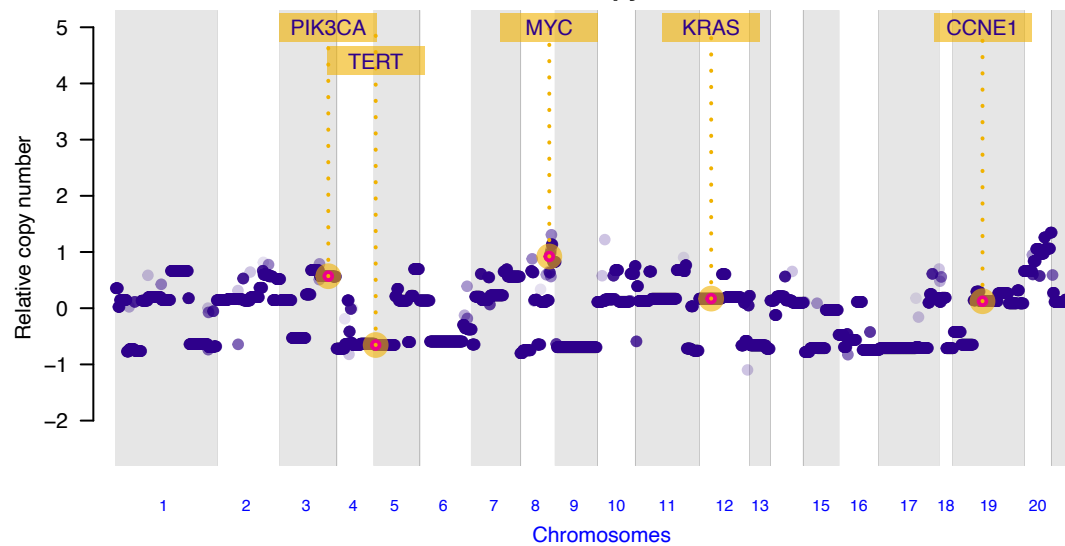

## Spheroids drug response

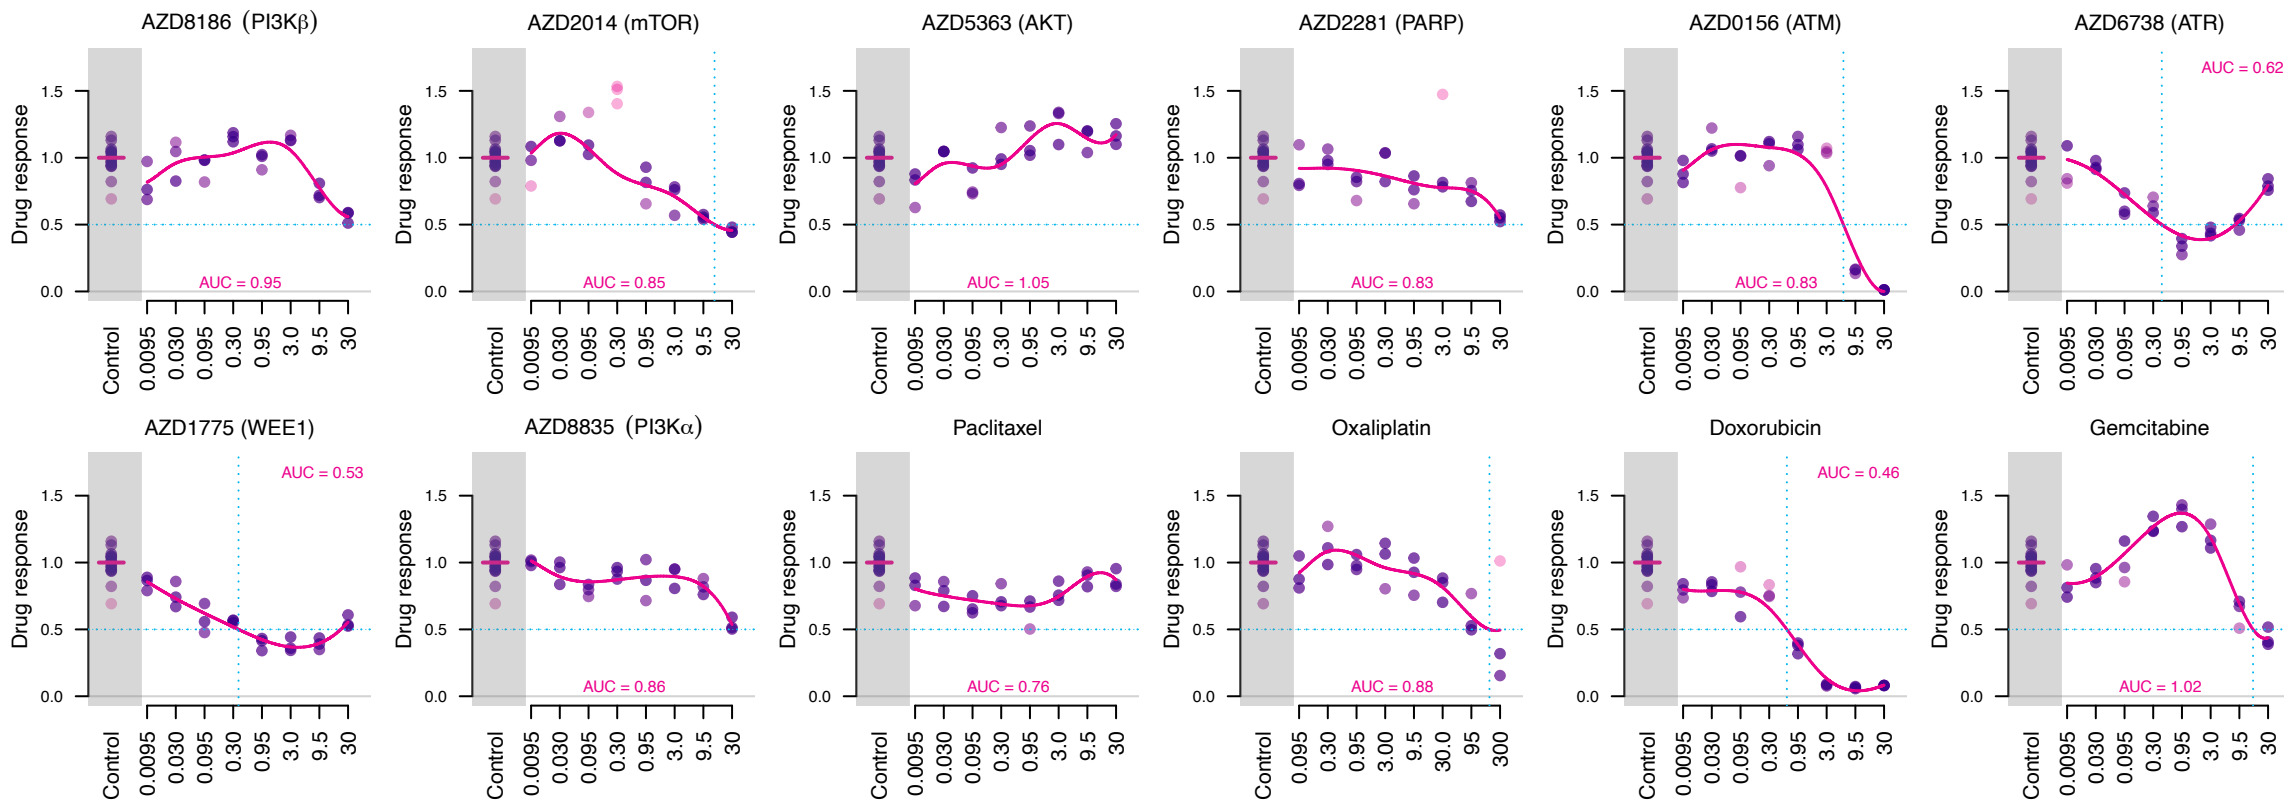

# Supplementary Figure S3t -- Patient 864 -- HGS Peritoneum -- Stage III

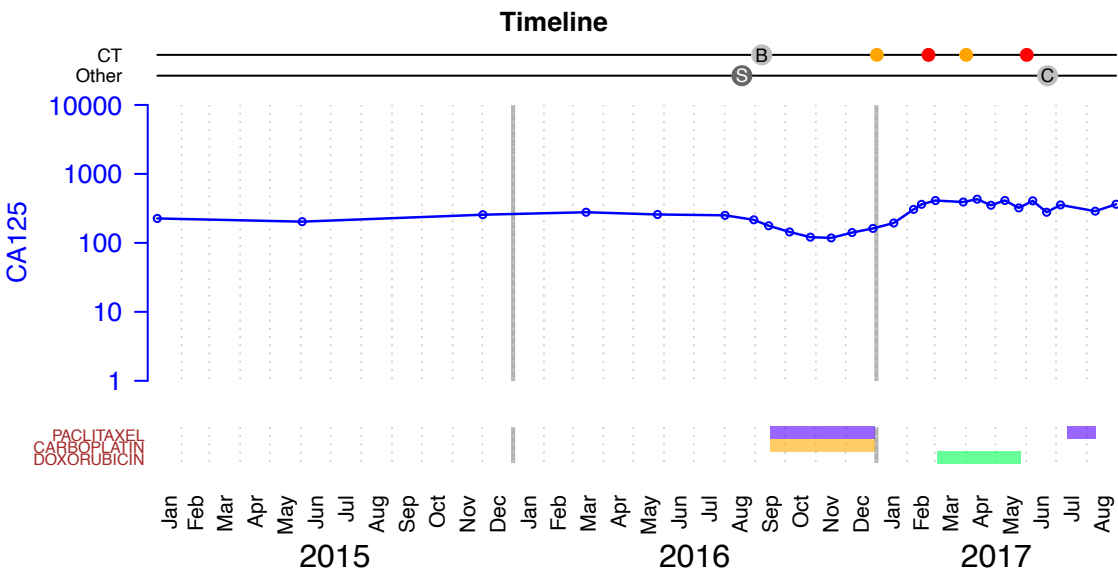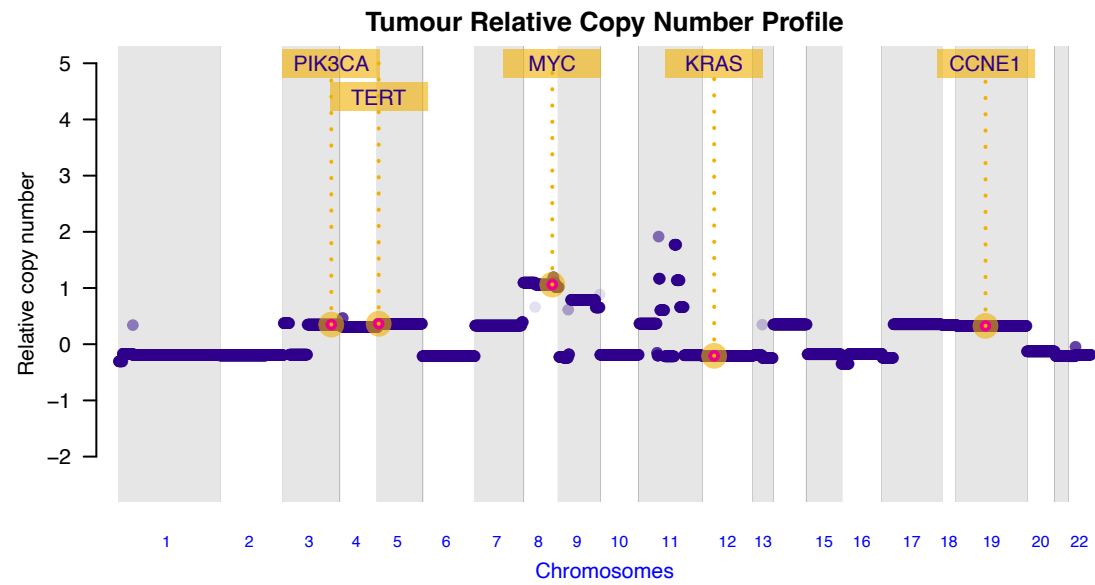

### Spheroids drug response

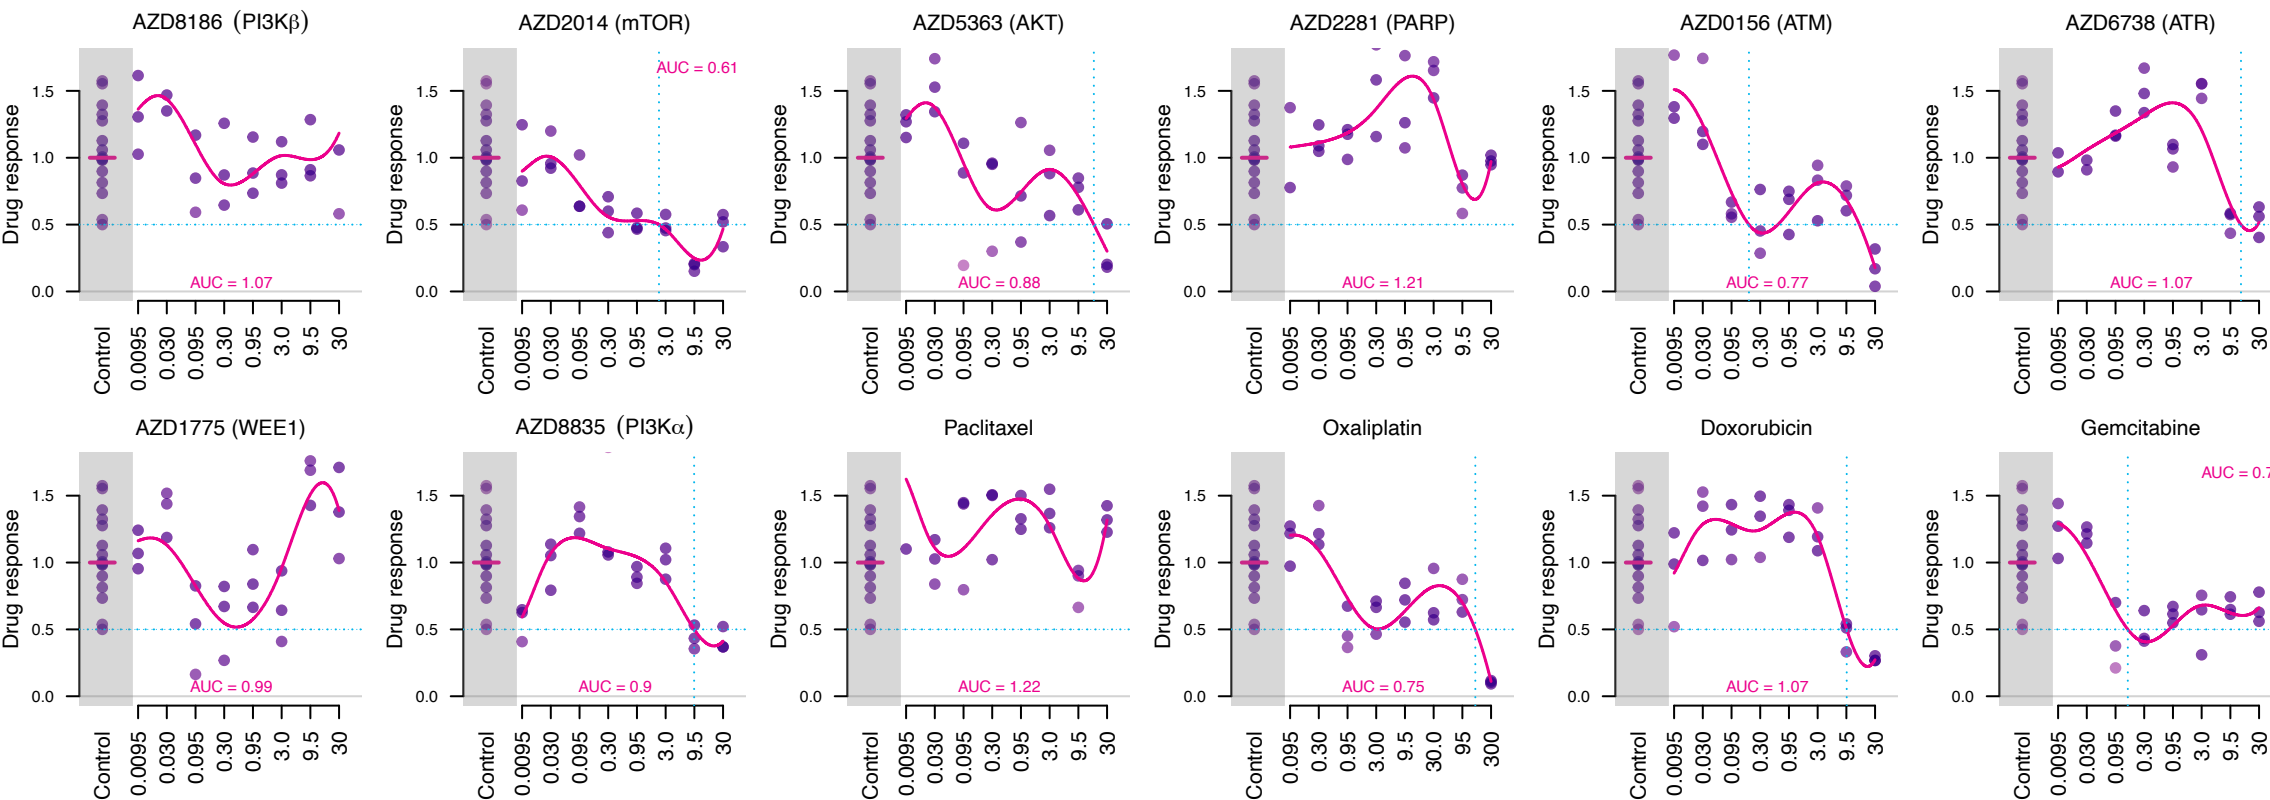

# Supplementary Figure S3u -- Patient 875 -- HGSOC -- Stage III

## Timeline

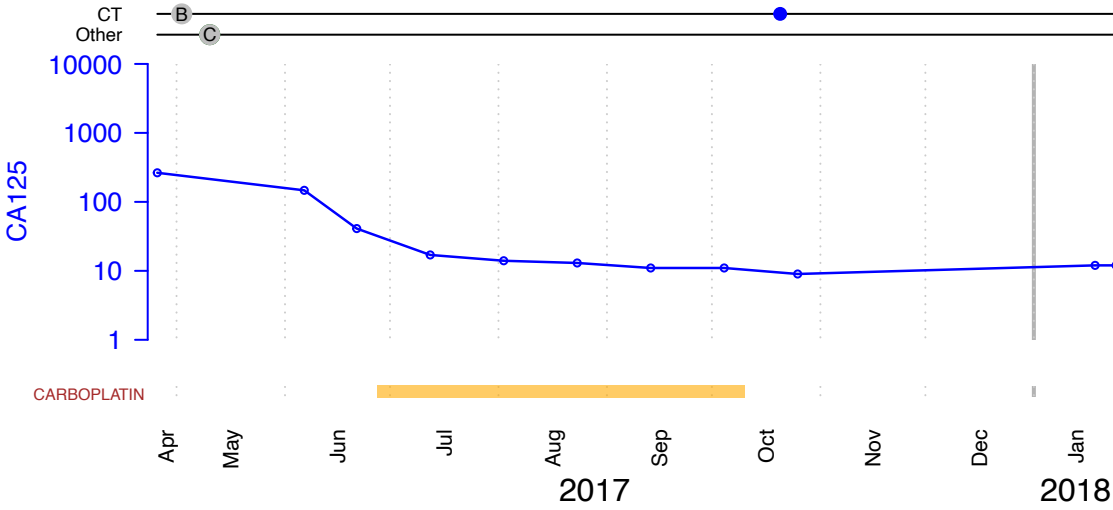

## Tumour Relative Copy Number Profile

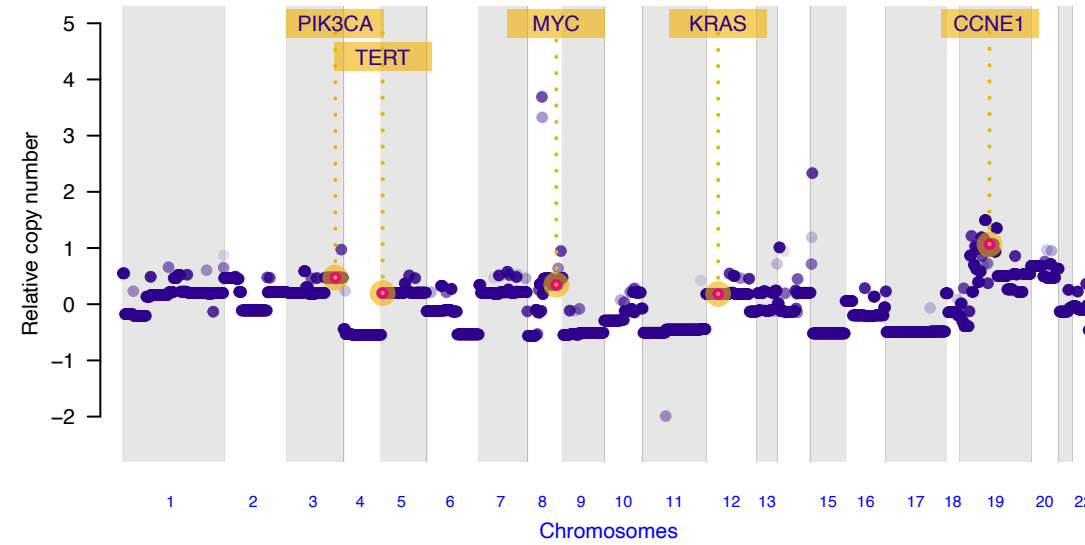

## Spheroids drug response

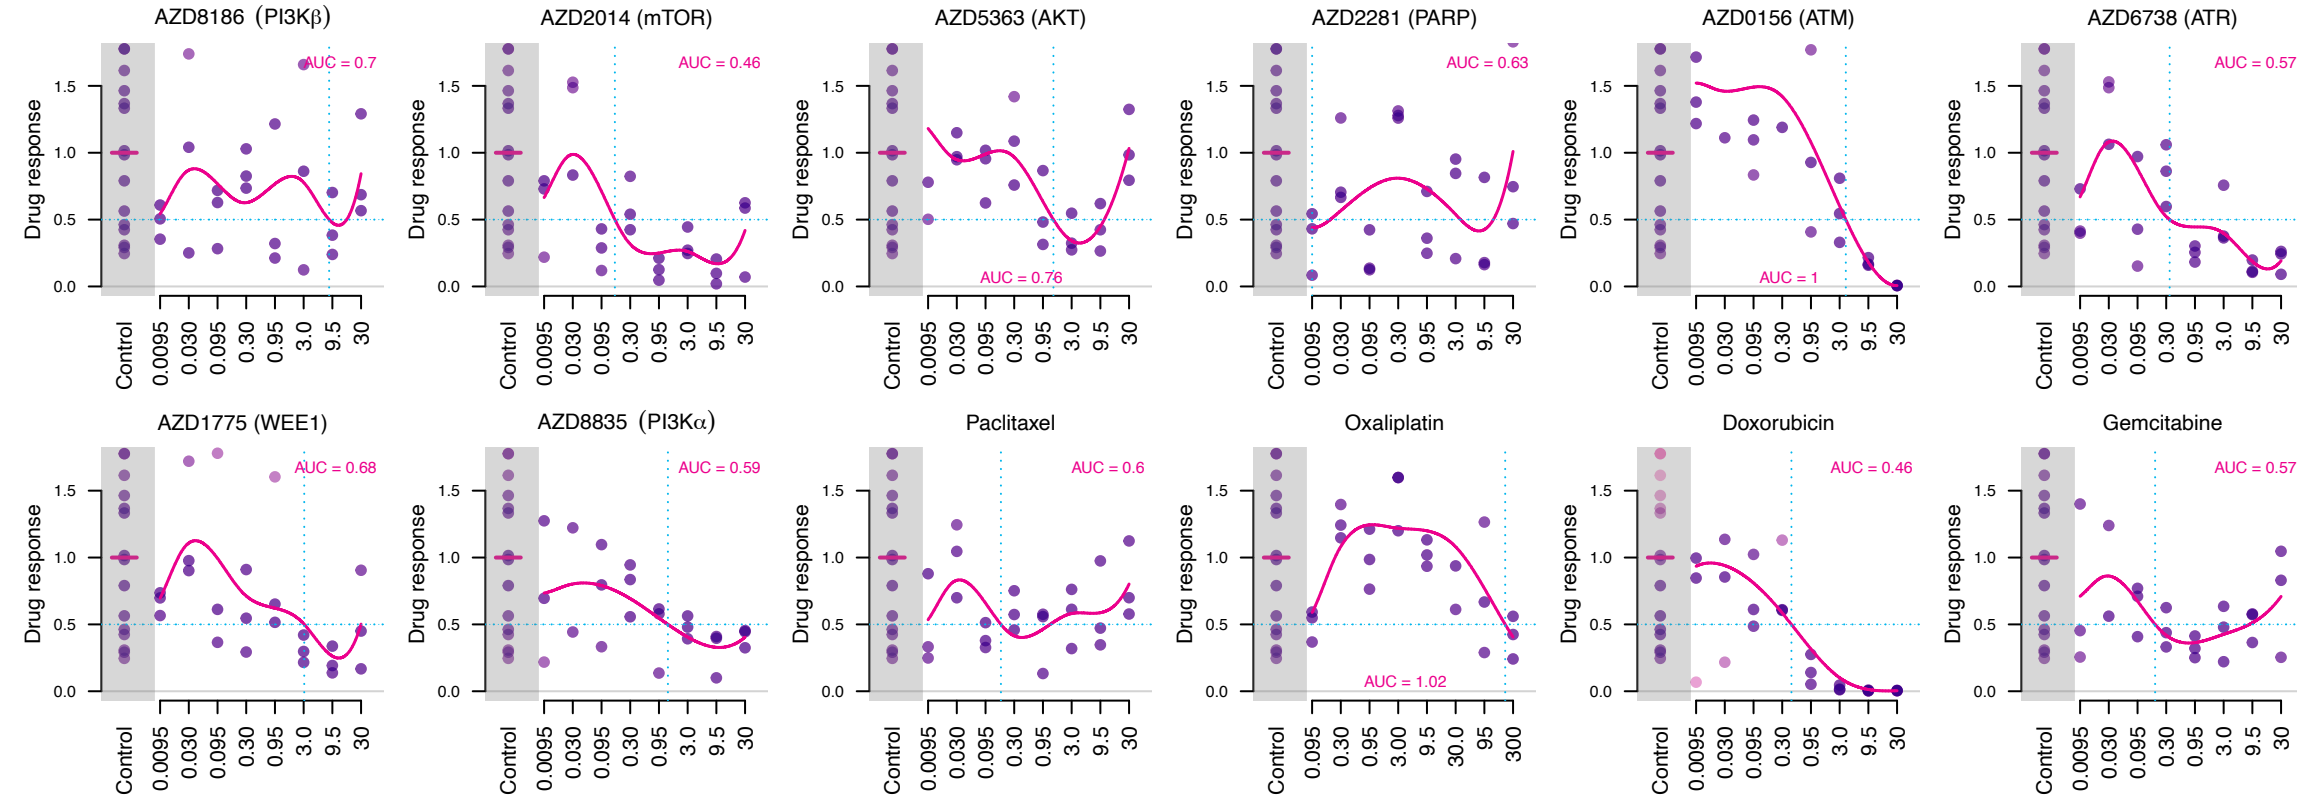



## Supplementary Figure S4

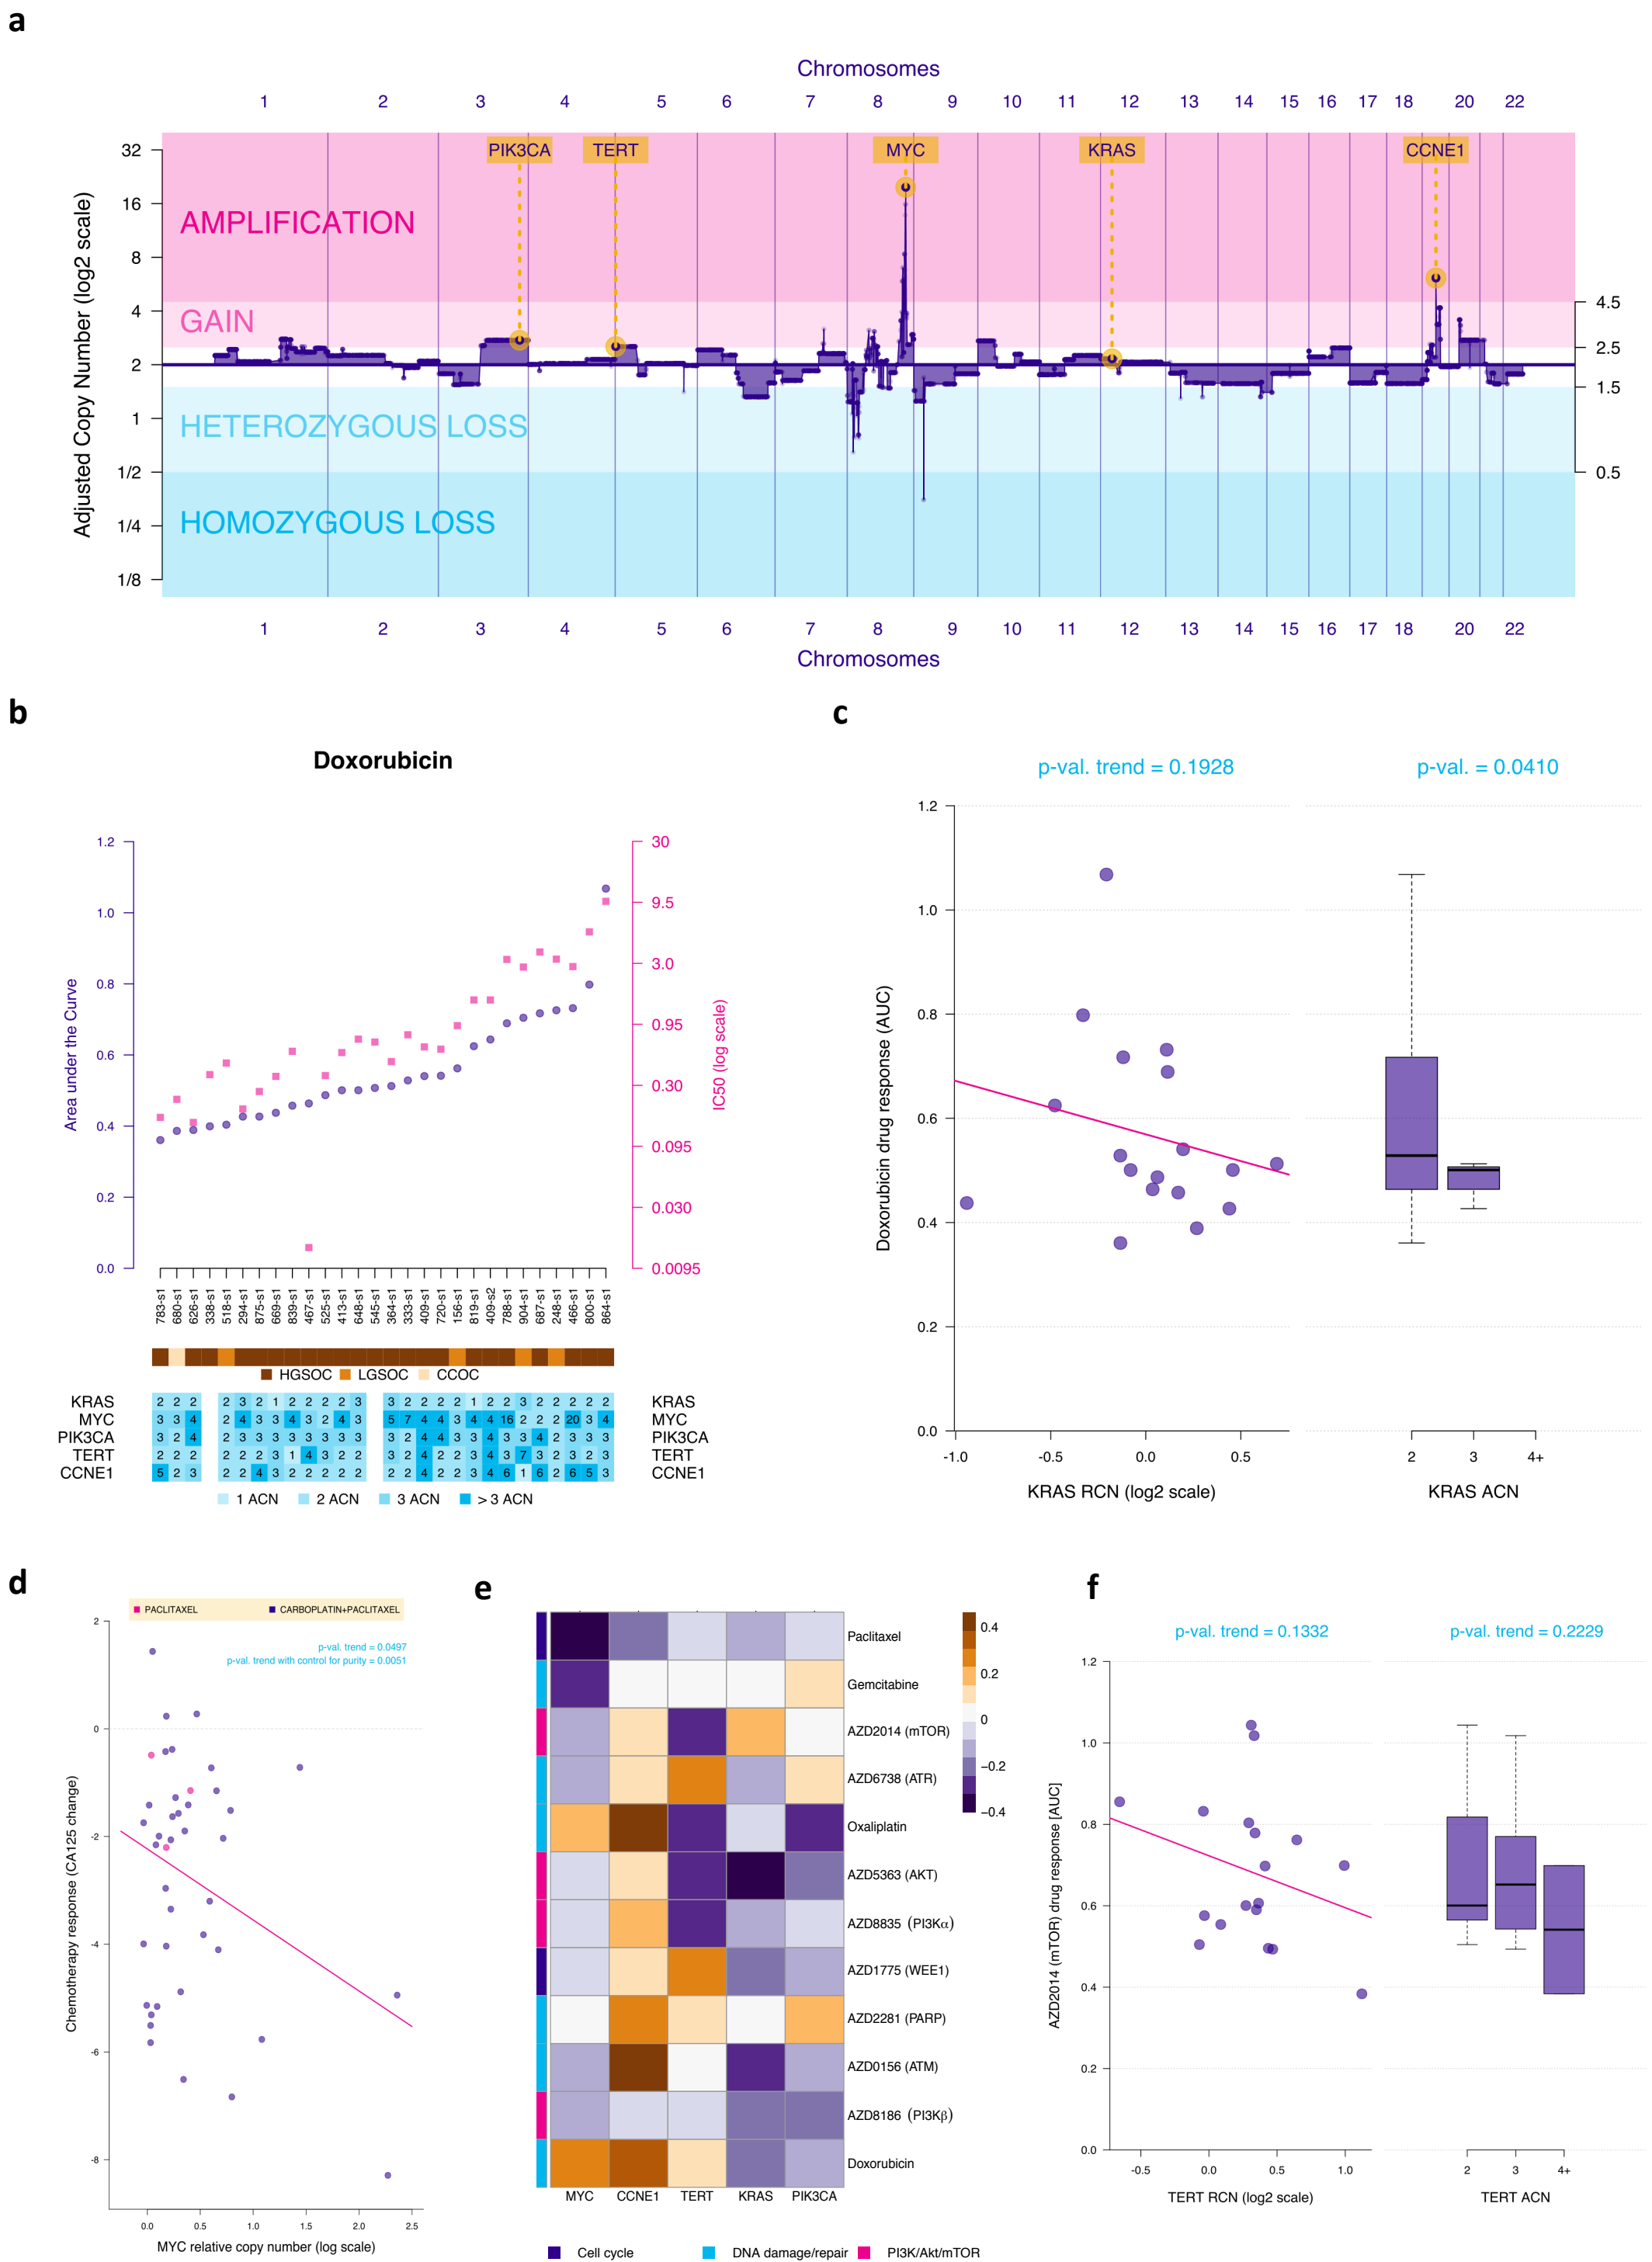

**Chromosomal copy number in specific driver genes as predictors of therapeutic response. a.** Plot showing an example of genomic profile (adjusted copy number for each gene) for one HGSOC sample (patient 466). **b.** Scatterplot showing doxorubicin response measured in all samples ( $n=28$ ) following the same format as in panel 2a. **c.** Association between KRAS RCN and ACN and doxorubicin *in vitro* response (as in panel 2b); number of independent samples ( $n=18$ ) and statistical test identical to Figure 2b; regression effect size of -0.2. **d.** Scatterplot showing the clinical response to paclitaxel (alone and in combination with carboplatin) as a function of MYC RCN. The linear mixed model p-value for the trend (two-sided Wald t-test of the slope parameter) obtained with or without correcting for purity are indicated. Clinical details on the samples used are summarised in Supplementary Table 1 on the right column (“Tumours”). **e.** Heatmap showing the correlation between copy number in selected genes and drug response measured by AUC. The tricoloured bar on the left shows the pathways affected by each specific drug. **f.** Association between TERT RCN and ACN and *in vitro* response to mTOR inhibition (as in panel 2b); number of independent samples ( $n=18$ ) and statistical test identical to Figure 2b; regression effect size of -0.28. For all boxplots (c and f), the central box was defined by the quantiles 0.25, 0.5 and 0.75 of the data, and the maximum whisker size equals 1.5 times of the interquartile range.

## Supplementary Figure S5

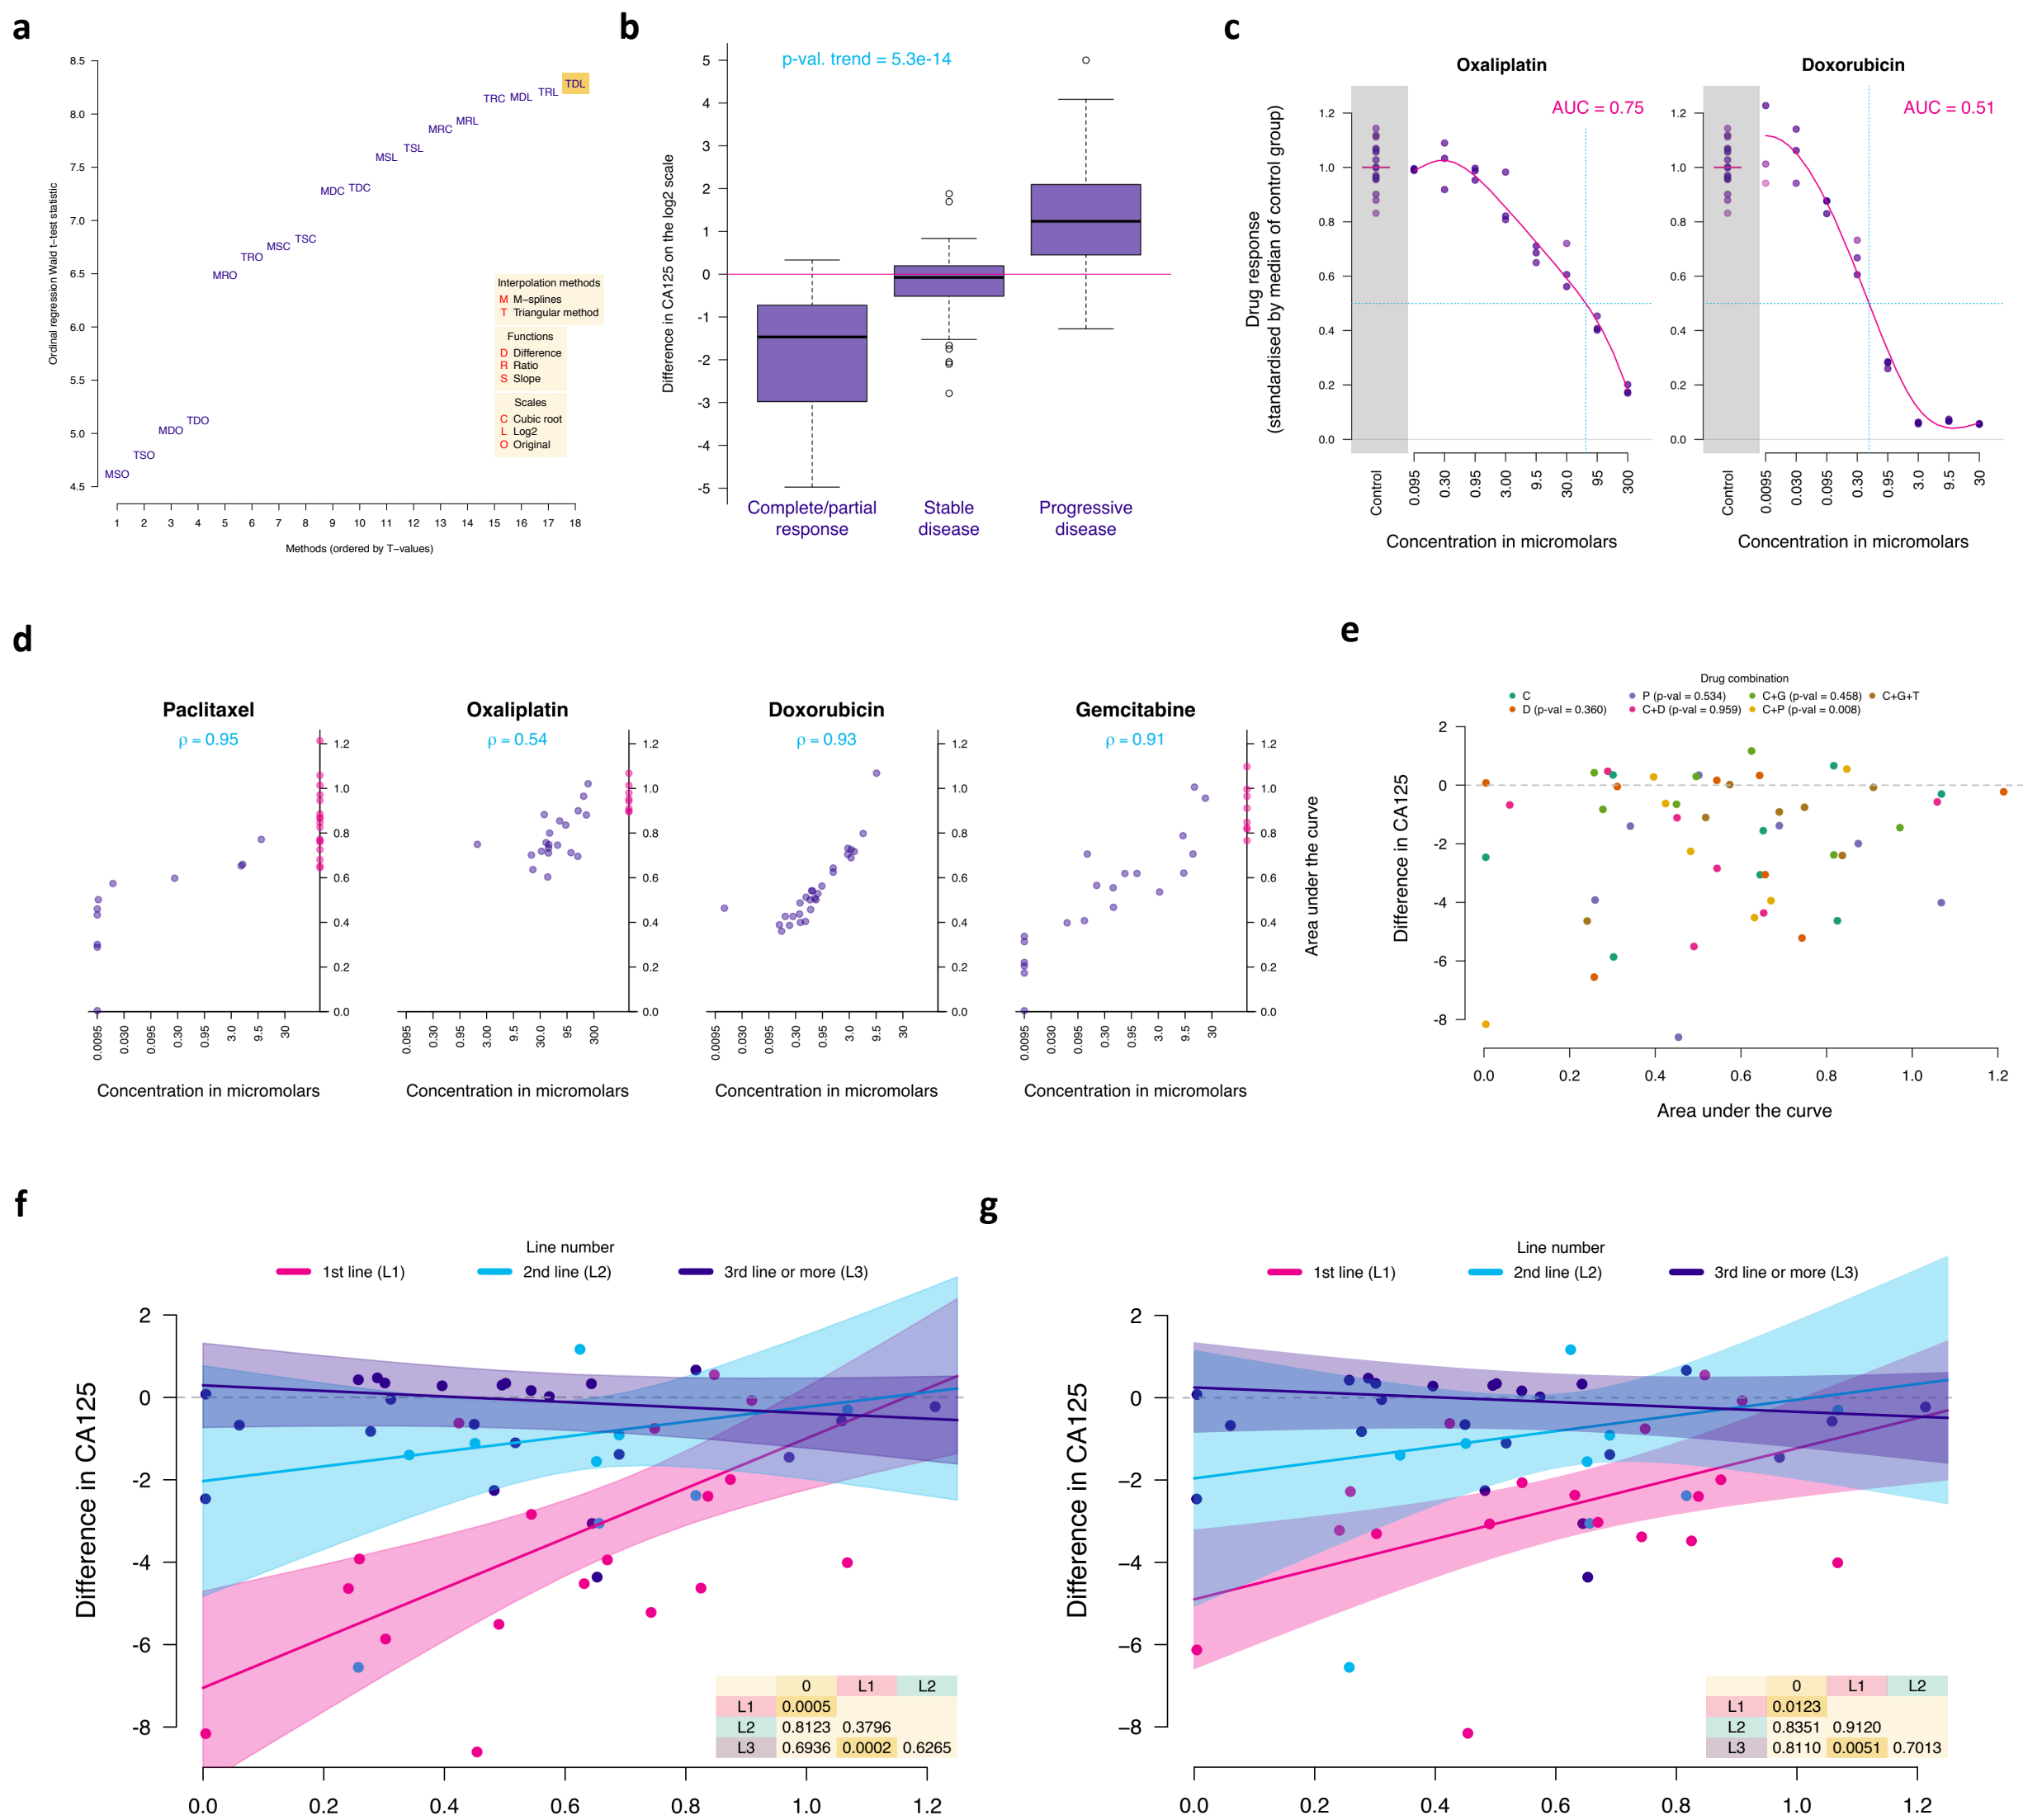

**Ex-vivo drug response in primary spheroid samples is associated with clinical response to chemotherapy.** Clinical response measures have been previously categorized semi-quantitatively (29). In order to define a continuous variable that integrated all parameters of the degree of response, we compared variation in serum Cancer Antigen 125 (CA125) levels with radiological response on CT scans during treatment, as surrogates of histological response to chemotherapy (Supplementary Figures S3a-u). **a.** Analysis to establish the best method, function and scale to assess CT response by using CA125 variation. The difference between levels of CA125 levels measured in log2 scale at the time of CT imaging had the best performance as a numerical predictor of CT-inferred variation in the disease burden **b.** Boxplots showing the association between variation in CA125 (measured by the difference of CA125 values in log 2 scale after and before each chemotherapy cycle) split by categories of CT radiological response and p-value of the two-sided Jonckheere-Terpstra test of association  $P \ll 0.001$ .  $N=159$  values of CA125 variation from  $n=27$  independent patients. For all boxplots, the central box was defined by the quantiles 0.25, 0.5 and 0.75 of the data, and the maximum whisker size equals 1.5 times of the interquartile range. **c.** Example of *in vitro* response to oxaliplatin and doxorubicin in a spheroid sample. Each dot measures cell viability against the average cell viability of the controls for each drug concentration after 5 days incubation. The pink line corresponds to the M-spline fit. AUC was obtained by integrating the drug response M-spline fit over the range of interest on the log scale. Intersection of dotted blue lines indicates IC50. Dot plot in grey shading indicates control data. We quantified cell viability in 26 primary human-derived spheroid samples after 5 days of *ex vivo* exposure to eight concentrations of each individual drug. The responses to four standard of care drugs (oxaliplatin, paclitaxel, doxorubicin and gemcitabine) were compared to drug-free control spheroid samples: these were reproducible across technical and biological replicates and were not influenced by the length of the drug viability assay. Oxaliplatin was substituted for cisplatin and carboplatin as these are inactivated by DMSO and produces highly similar cellular effects. **d.** Scatterplots showing the association between area under the curve values and IC50 for selected drugs. Each dot represents one sample. Pink dots represent cases where IC50 was not reached owing to viability  $\leq 50\%$  at maximum dose Spearman's Rho correlation estimates are indicated in turquoise. **e & f.** Scatterplots showing the clinical responses measured by variation in logarithmic scale of CA125 during each chemotherapy regimen/line in each patient (y axis) as a function of the in-vitro response to the same drugs, measured by area under the curve on samples from the same patient (x axis). When combinations of drugs were used in the clinical setting, the combined AUC was obtained by multiplying AUC for individual drugs; Points are colour-coded by drugs (panel e) or chemotherapy line numbers (panel f). In panel e, the p-values of the two-sided Wald t-tests defining if the slope parameter of linear mixed models corresponding to each drug are different from 0 are indicated in the legend. In panel f, the mixed model fitted lines per chemotherapy lines and corresponding 95% confidence intervals (shaded areas) are indicated. The p-values of the Wald t-tests performing pairwise comparison of the chemotherapy line slopes or comparing the chemotherapy line slopes to 0 are indicated P: paclitaxel; C: carboplatin; D: doxorubicin; G: gemcitabine; T: targeted inhibitor). When we compared in-vitro response (AUC) to the observed clinical response (CA125 changes) in the same patient to the same drug or class of drugs, we found that the correlation between in vitro and clinical response was strongest for the combination of platinum-based and paclitaxel and first-line chemotherapy. **g.** Plot replicating the analysis in the plot f after excluding CA125 variation in the month after the surgery to eliminate possible effect of surgery in CA125 changes.

Supplementary Figure S6

**a**

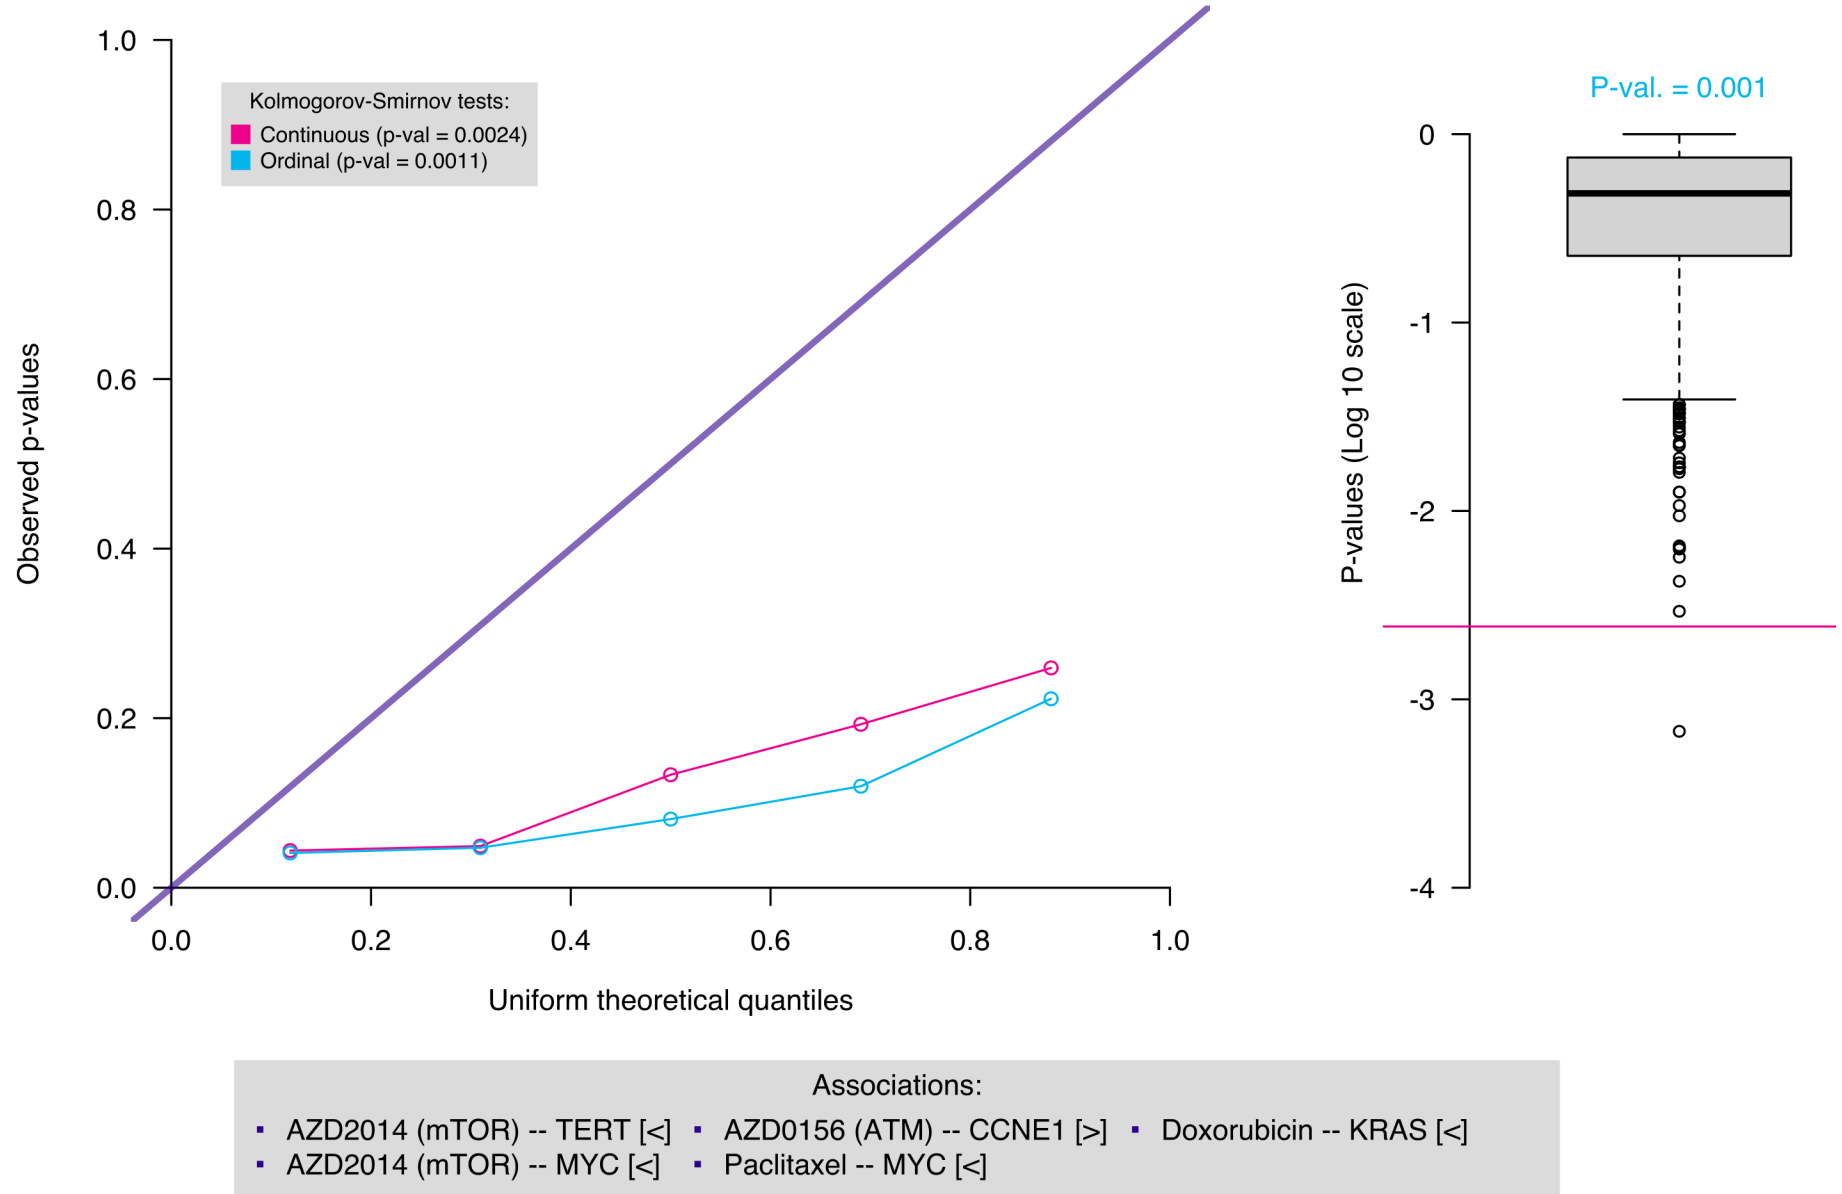

**b**

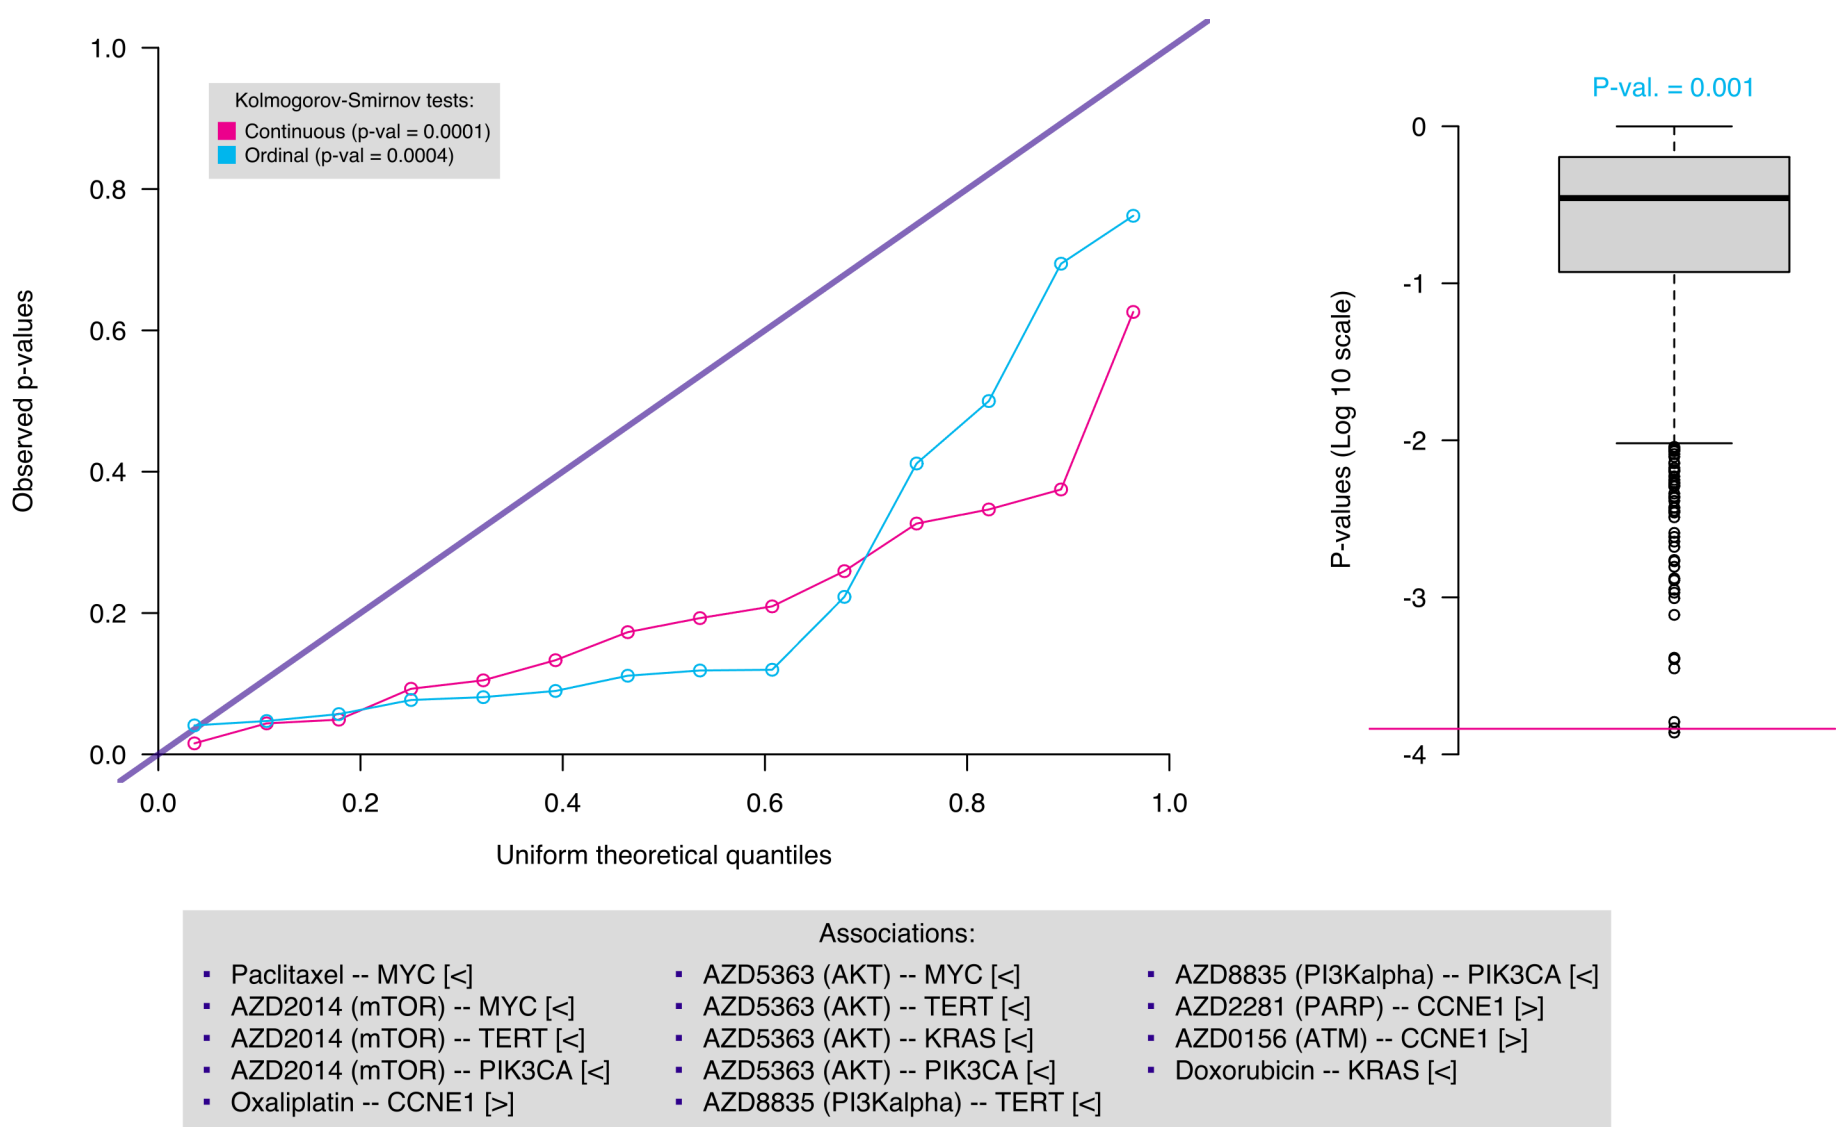

**a. Left plot:** Comparison of the empirical distribution functions of the p-values related to the analyses of Figures 2b, 2d, 2H, S4c and S4f when considering gene copy number as a continuous (pink) or ordinal (turquoise) predictor, to the uniform distribution by means of QQ-plots. P-values of Kolmogorov–Smirnov tests (*ks.test* function of the *stats* R package) comparing the empirical distribution functions of the p-values to the uniform distribution are available. Below the plot we present the list of the *drug - gene copy number* associations of interest (n=5) with the assumed association direction. **Right plot:** boxplot of the Kolmogorov–Smirnov test p-values obtained as described above when considering 1000 random sets of *drug - gene copy number* associations. The pink line corresponds to the Kolmogorov–Smirnov test p-value obtained on the original list of pre-specified *drug - gene copy number* associations. Only one random association over a 1000 obtained a smaller p-value than the one considering the original list of pre-specified associations. **B:** the same analysis as in A with an extended set of n=14 *drug - gene copy number* associations. For boxplots in panels a and b, the central box was defined by the quantiles 0.25, 0.5 and 0.75 of the data, and the maximum whisker size equals 1.5 times of the interquartile range.

Supplementary Table 1 - Demographic characterisation of the patients with HGSOc in the OVO4 clinical cohort

|                           |                                                       | <b>Spheroids</b> | <b>Tumours</b> |
|---------------------------|-------------------------------------------------------|------------------|----------------|
| <b>Number of Patients</b> |                                                       | 22               | 64             |
| <b>Age</b>                | <b>Median</b>                                         | 68               | 65.5           |
|                           | <b>Range</b>                                          | 38-90            | 44-83          |
| <b>FIGO Stage</b>         | <b>I</b>                                              |                  | 2 (3%)         |
|                           | <b>II</b>                                             | 1 (5%)           | 1 (2%)         |
|                           | <b>III</b>                                            | 9 (41%)          | 37 (58%)       |
|                           | <b>IV</b>                                             | 12 (55%)         | 19 (30%)       |
|                           | <b>Unknown</b>                                        |                  | 5 (8%)         |
| <b>Surgery Type</b>       | <b>Primary debulking surgery</b>                      | 7 (32%)          | 16 (25%)       |
|                           | <b>Interval debulking surgery</b>                     | 9 (41%)          | 44 (69%)       |
|                           | <b>Unknown</b>                                        | 6 (27%)          | 4 (6%)         |
| <b>Surgery Outcome</b>    | <b>No residual</b>                                    | 3 (14%)          | 25 (39%)       |
|                           | <b>Residual disease</b>                               | 13 (59%)         | 24 (38%)       |
|                           | <b>Unknown</b>                                        | 6 (27%)          | 15 (23%)       |
| <b>Treatment</b>          | <b>Alkylating agents<br/>(Carboplatin/Cisplatin)</b>  | 22 (100%)        | 63 (98%)       |
|                           | <b>Taxanes (Paclitaxel)</b>                           | 18 (82%)         | 56 (88%)       |
|                           | <b>Anthracyclines<br/>(Doxorubicin/Epirubicin)</b>    | 16 (73%)         | 38 (59%)       |
|                           | <b>Antimetabolites<br/>(Gemcitabine/Capecitabine)</b> | 10 (46%)         | 24 (38%)       |
|                           | <b>Anti-angiogenetic agent<br/>(Bevacizumab)</b>      | 4 (18%)          | 4 (6%)         |
|                           | <b>Other</b>                                          | 9 (41%)          | 17 (27%)       |

Supplementary Table 2 - Characterisation of sample location, cell purity and TP53 mutation allele fraction

| Patient ID | Age at Diagnosis | Tissue Site      | Purity by Pathologist (%) | Purity Average (allele fraction) |
|------------|------------------|------------------|---------------------------|----------------------------------|
| 22         | 63               | omentum          | 40                        | 0.1225                           |
| 65         | 72               | omentum          | NA                        | NA                               |
| 75         | 55               | ovary            | NA                        | NA                               |
| 88         | 55               | omentum          | 80                        | 0.31                             |
| 96         | 68               | omentum          | 30                        | 0.3745                           |
| 101        | 64               | omentum          | NA                        | NA                               |
| 103        | 70               | omentum          | NA                        | NA                               |
| 124        | 65               | omentum          | NA                        | NA                               |
| 160        | 73               | omentum          | 90                        | 0.4615                           |
| 165        | 66               | omentum          | 70                        | 0.471                            |
| 189        | 63               | ovary            | 90                        | 0.7245                           |
| 193        | 74               | omentum          | 30                        | NA                               |
| 197        | 63               | omentum          | 70                        | NA                               |
| 203        | 74               | omentum          | 70                        | NA                               |
| 217        | 82               | omentum          | NA                        | NA                               |
| 220        | 65               | omentum          | 90                        | 0.261                            |
| 243        | 65               | omentum          | 90                        | NA                               |
| 247        | 75               | omentum          | NA                        | NA                               |
| 261        | 74               | omentum          | 20                        | 0.191                            |
| 266        | 62               | brain met        | 90                        | 0.7415                           |
| 273        | 75               | omentum          | 30                        | 0.116                            |
| 295        | 65               | omentum          | 30                        | 0.077                            |
| 303        | 66               | omentum          | 60                        | 0.467                            |
| 318        | 47               | unknown          | NA                        | NA                               |
| 348        | 57               | omentum          | 20                        | 0.0475                           |
| 357        | 71               | omentum          | 60                        | 0.209                            |
| 358        | 68               | omentum          | 30                        | 0.1825                           |
| 369        | 59               | omentum          | NA                        | NA                               |
| 396        | 61               | unknown          | NA                        | NA                               |
| 405        | 63               | ovary nodule     | 30                        | 0.091                            |
| 410        | 76               | omentum          | 90                        | 0.907                            |
| 413        | 64               | omentum          | 70                        | 0.7115                           |
| 414        | 68               | omentum          | 60                        | 0.327                            |
| 416        | 63               | omentum          | 5                         | NA                               |
| 427        | 69               | ovary            | NA                        | NA                               |
| 434        | 75               | ovary            | 30                        | 0.3125                           |
| 442        | 59               | omentum          | 10                        | NA                               |
| 461        | 71               | ovary            | NA                        | NA                               |
| 464        | 75               | omentum          | NA                        | NA                               |
| 466        | 48               | omentum          | 80                        | 0.407                            |
| 467        | 44               | omentum          | 20                        | 0.177                            |
| 469        | 67               | omentum          | 40                        | 0.1625                           |
| 475        | 50               | ovary            | 80                        | 0.581                            |
| 493        | 59               | ng colon nodule  | 80                        | 0.8715                           |
| 495        | 77               | omentum          | NA                        | NA                               |
| 524        | 70               | ovary            | 10                        | 0.0915                           |
| 535        | 66               | ovary left       | 20                        | 0.6575                           |
| 581        | 78               | uterus           | 90                        | 0.979                            |
| 600        | 46               | omentum          | 10                        | 0.091                            |
| 612        | 78               | ovary            | 90                        | 0.8595                           |
| 629        | 63               | ascites          | 90                        | 0.684                            |
| 648        | 58               | liver metastasis | 30                        | 0.233                            |
| 650        | 64               | omentum          | 80                        | 0.532                            |
| 658        | 70               | ovary            | 90                        | 0.6135                           |
| 716        | 65               | omentum          | 80                        | 0.454                            |
| 761        | 83               | ovary            | 40                        | 0.389                            |
| 771        | 51               | ovary            | 90                        | NA                               |
| 781        | 54               | ovary            | 50                        | 0.234                            |
| 788        | 64               | omentum          | 60                        | 0.573                            |
| 853        | 57               | ovary            | 90                        | 0.8135                           |
| 855        | 69               | omentum          | NA                        | NA                               |
| 875        | 70               | ovary            | 80                        | 0.72                             |
| 891        | 69               | ovary            | 70                        | 0.4855                           |
| 977        | 76               | omentum          | 20                        | 0.222                            |
